# Supplementary material for: Enhanced mammalian genome editing by new Cas12a orthologs with optimized crRNA scaffolds
Source: PubMed Central journal article supplement (PMC6362571; doi:10.1186/s13059-019-1620-8), 2019-02-05
Supplement: 13059_2019_1620_MOESM2_ESM.pdf [file 13059_2019_1620_MOESM2_ESM.pdf]

**a**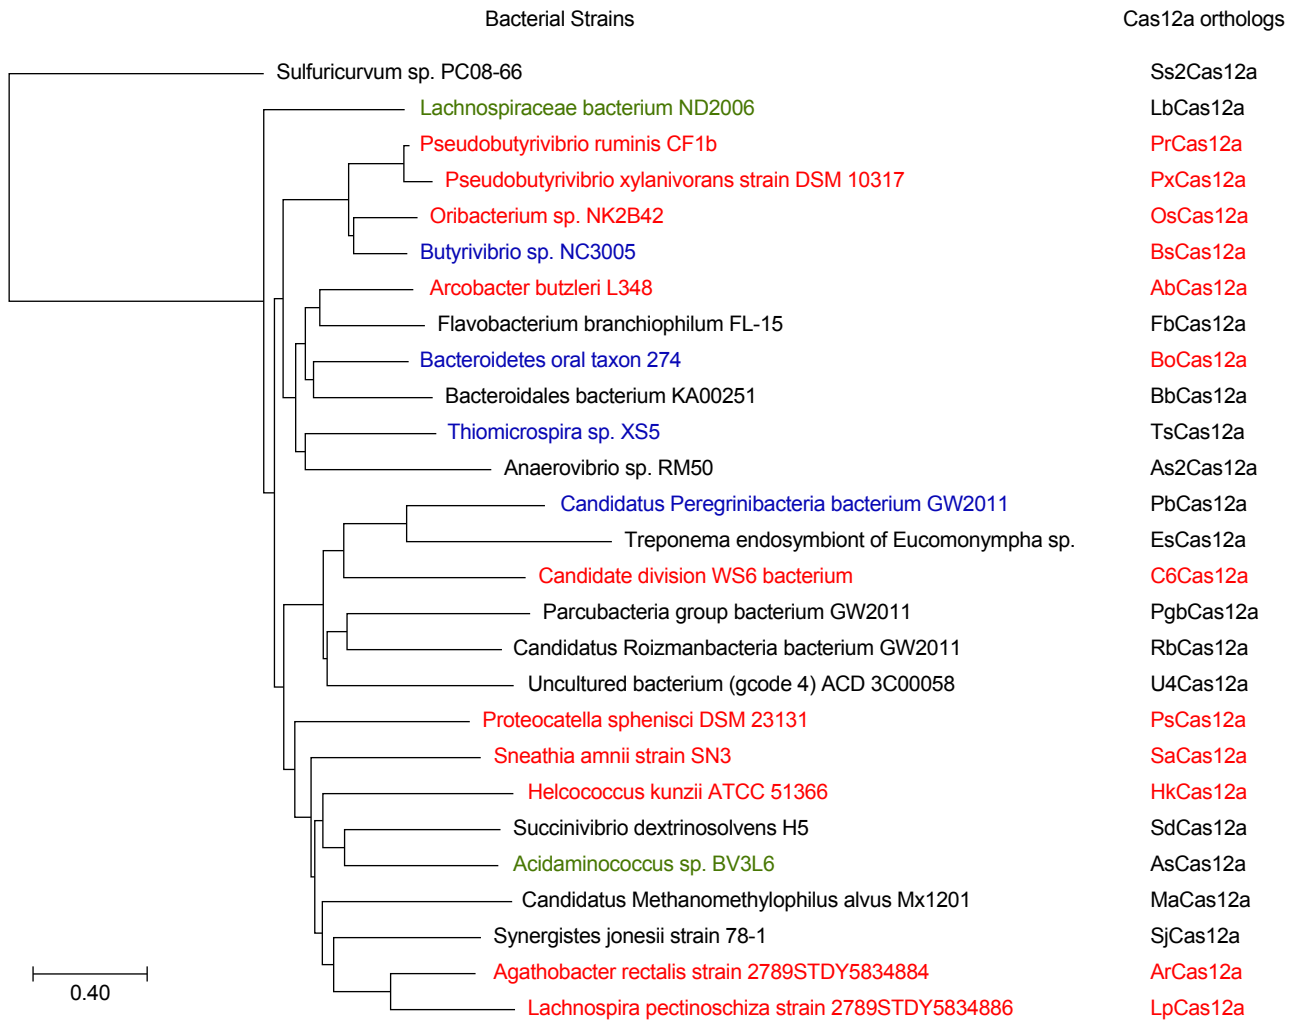**b**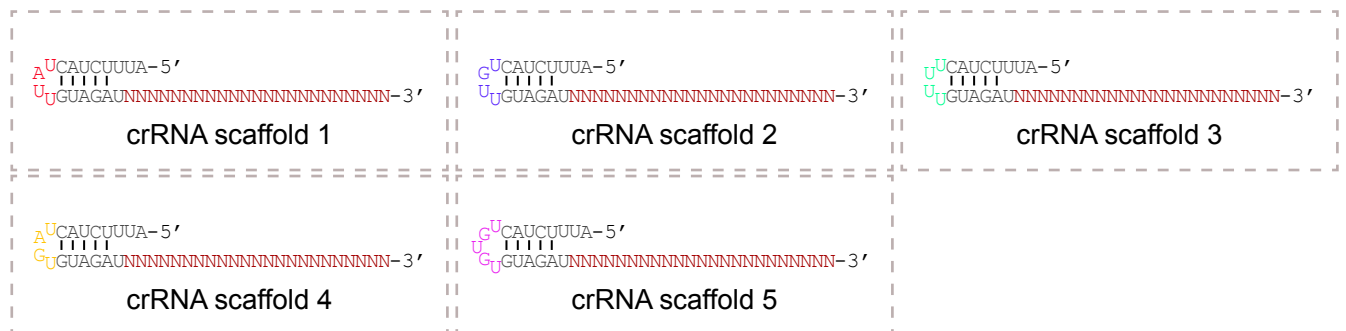

**C**

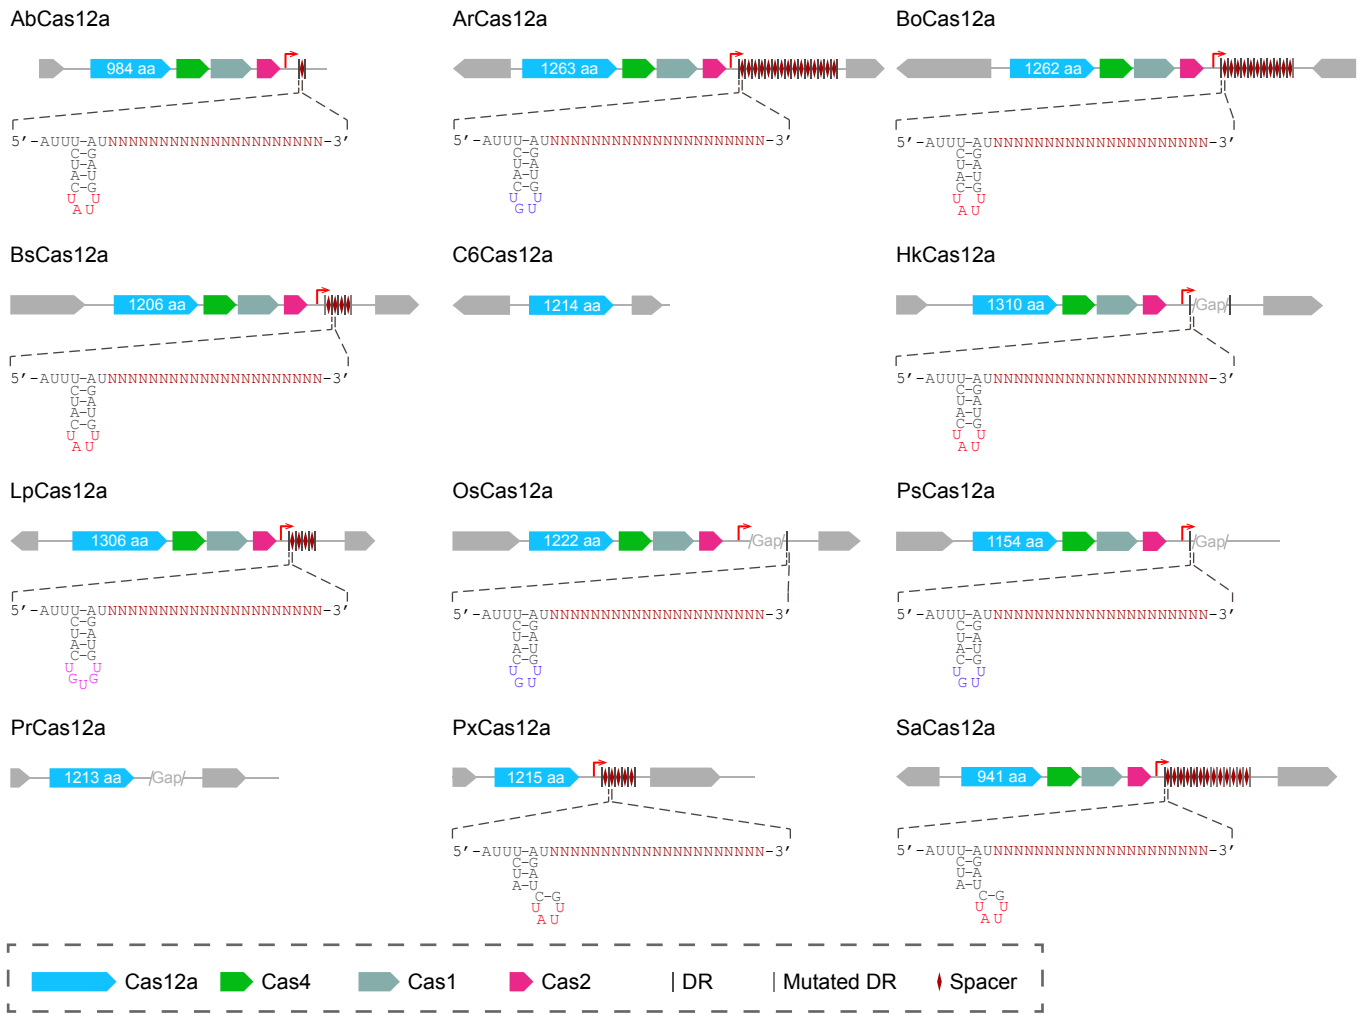

**Figure S1.** Phylogeny tree of non-redundant Cas12a orthologs and selected Cas12a loci for genome editing. **a** Evolutionary relationships of the Cas12a bacterial strains. Candidates synthesized for further functional experimentation were highlighted in red. **b** Schematic showing the 5 naturally existed crRNA scaffolds from the 25 Cas12a bacterial strains in [Figure 1a](#). **c** Maps of bacterial genomic CRISPR-Cas12a loci corresponding to the 12 candidates selected to be tested.

**a**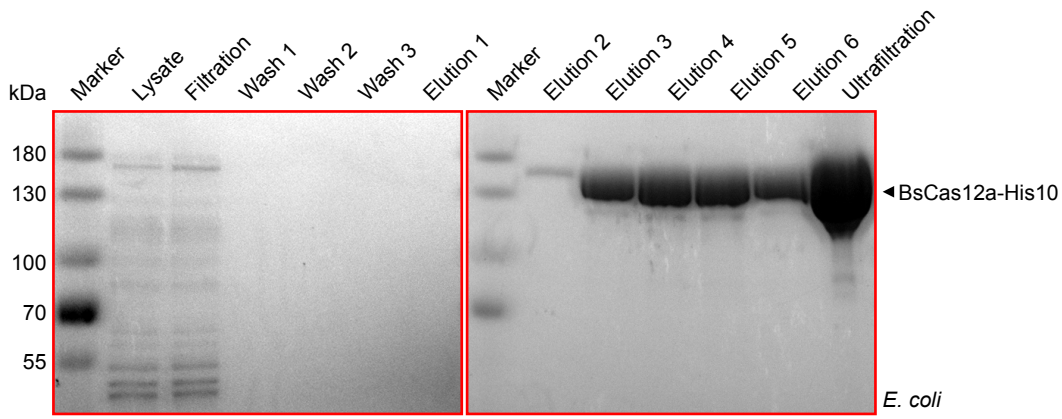**b**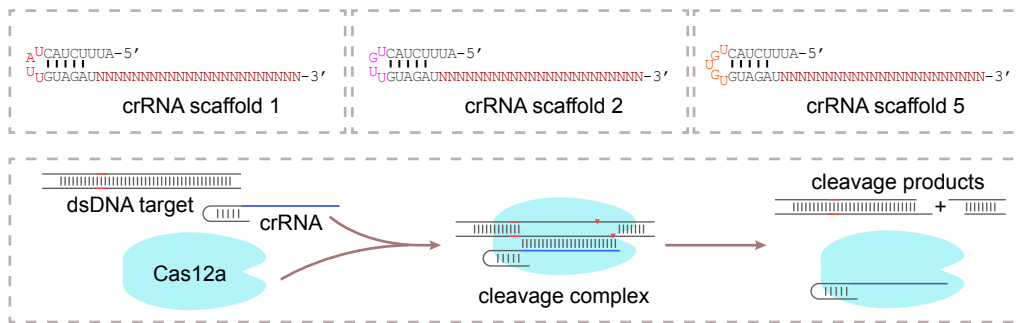**c**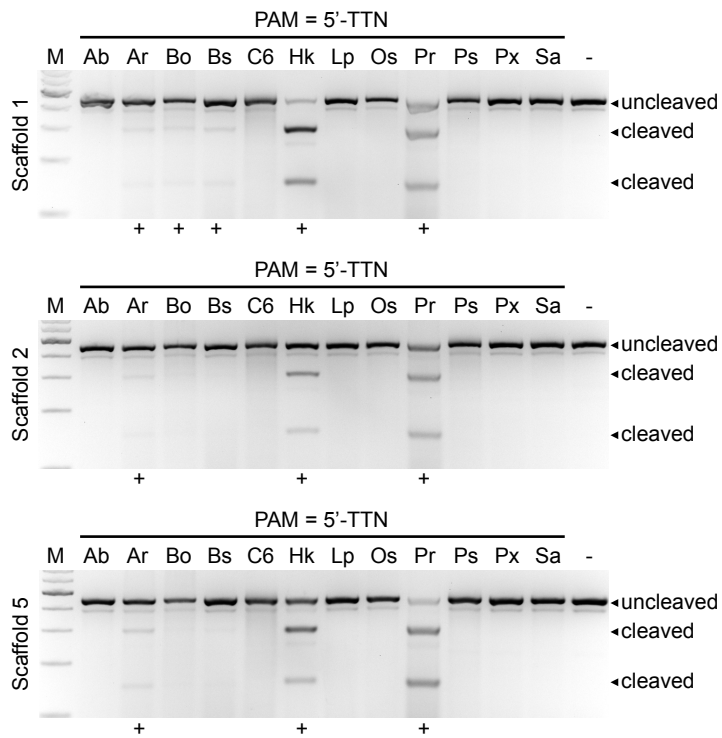

**d**

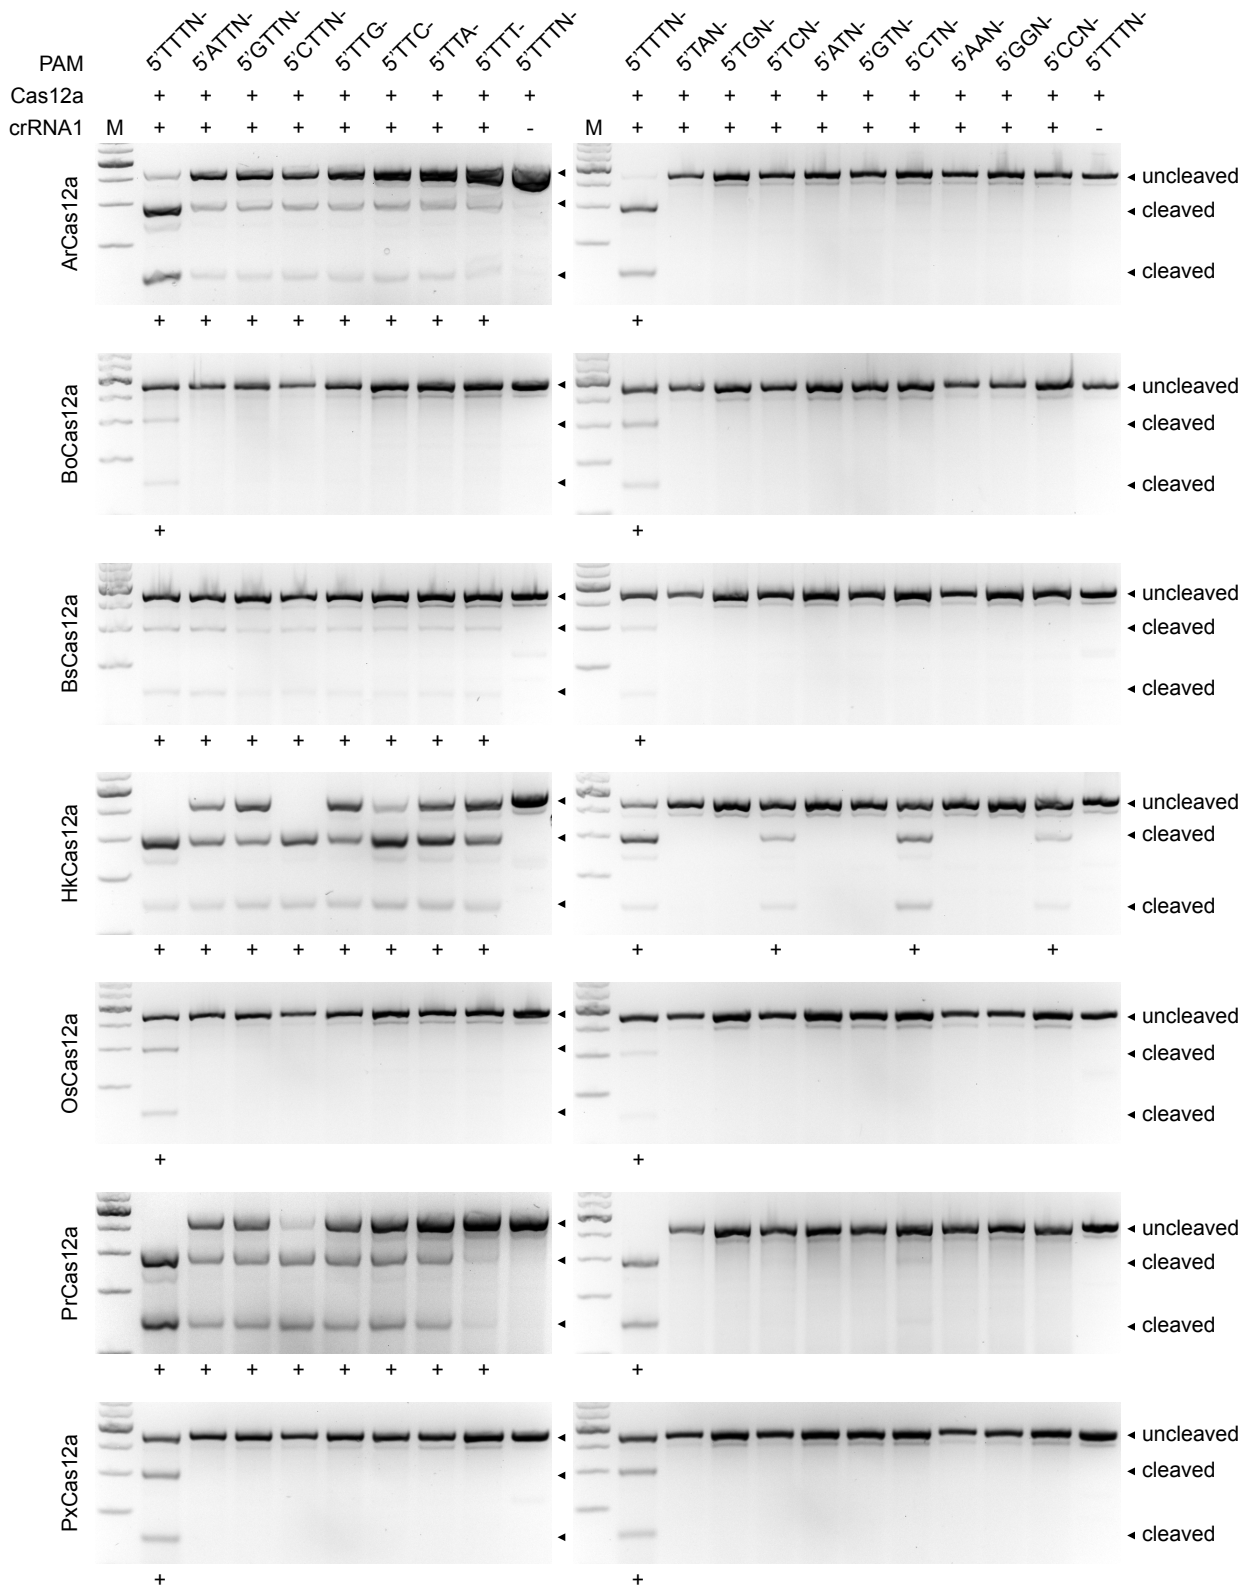



**Figure S2.** *In vitro* DNA cleavage assay for Cas12a PAM sequences. **a** Coomassie blue stained SDS-PAGE of *E. coli* expressed BsCas12a stepwise purification as a representative. The black triangle indicates Cas12a-His<sub>10</sub> fused protein. **b** (*Upper*) Schematic showing the 3 naturally existed crRNA scaffolds used for *in vitro* DNA cleavage assay. (*Lower*) Depiction of workflow of *in vitro* DNA cleavage assay. **c** *In vitro* DNA cleavage assay using the 12 candidate Cas12a proteins directed by crRNA scaffold 1, 2 and 5, respectively. The PCR-generated templates contained 5'-T rich PAM sequences. N = A, T, G, C. M, DNA marker. **d** *In vitro* DNA cleavage analysis of the seven Cas12a nucleases possessing *in vitro* nuclease activity in [Figure S2c](#) to target various 5' PAM sequences directed by crRNA scaffold 1. N = A, T, G, C. M, DNA marker.

**a**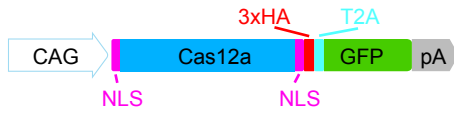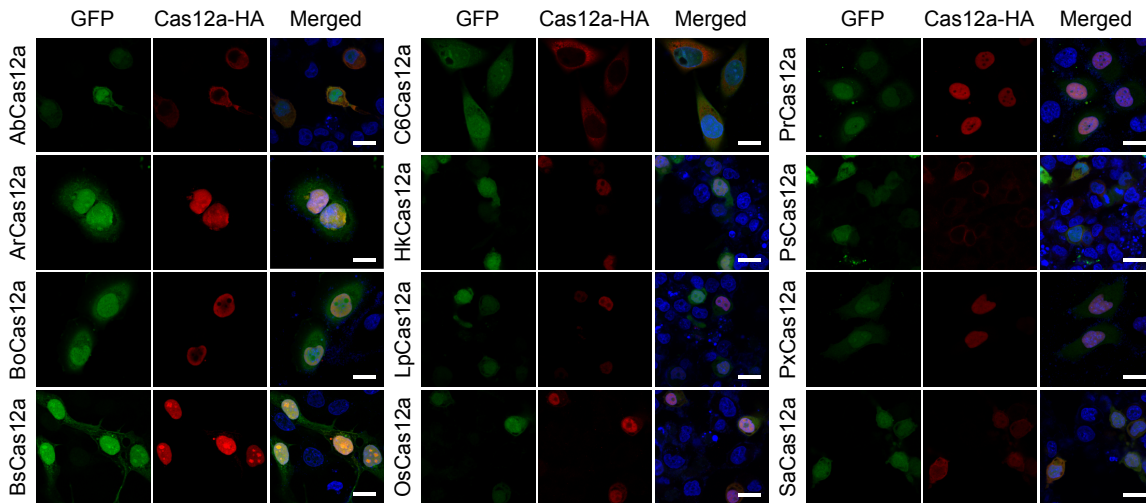**b**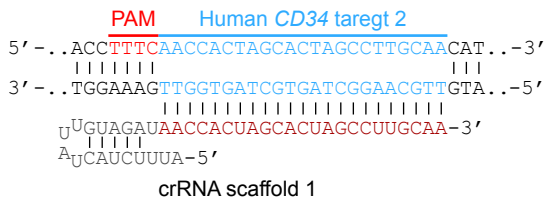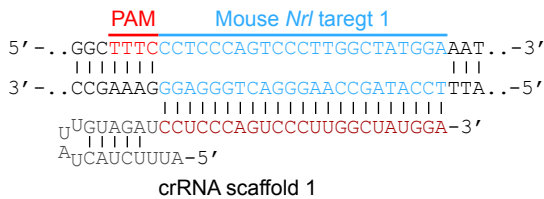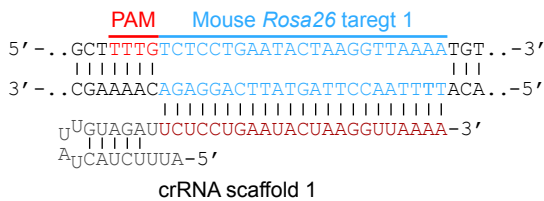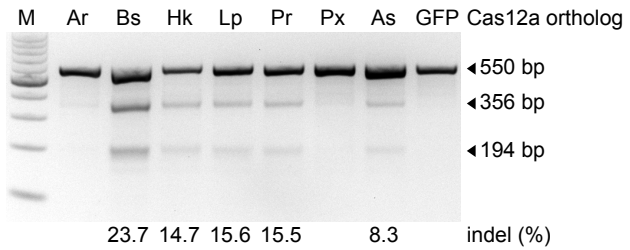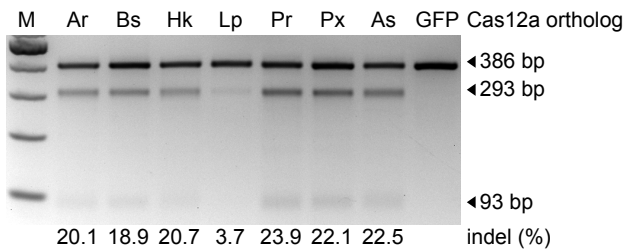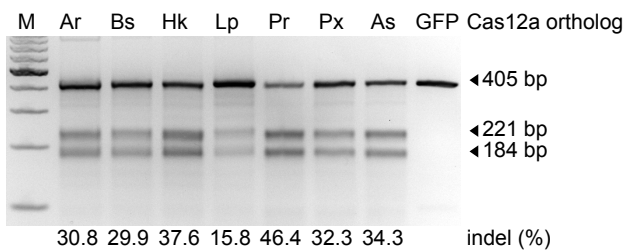**c**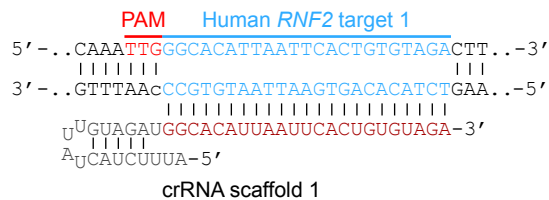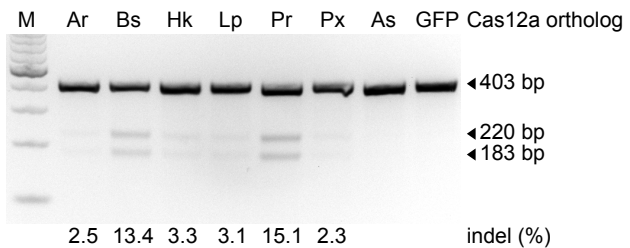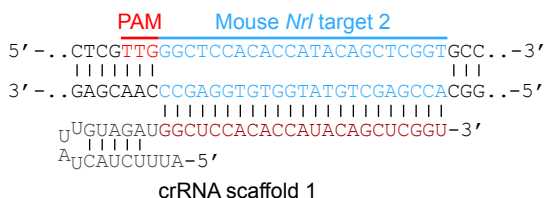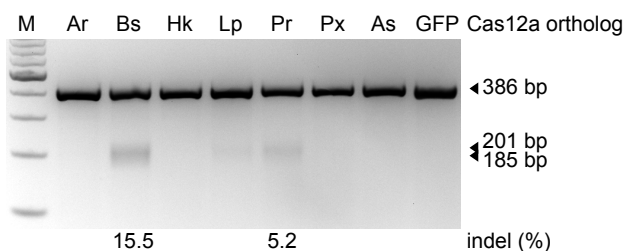

d

Human CD34 target 1

ArCas12a

```

CCACCCAGCCAACGTTTCAACTCCAGAGACAACCTT-----GA-AGCCTAG-CCTGTCACCTGGAAATGTTTCAGACCT
CCACCCAGCCAACGTTTCAACTCCAGAGACAACcctttccagggtgacaggctaggCCTGTCACCTGGAAATGTTTCAGACCT
CCACCCAGCCAACGTTTCAACTCCAGAGACA-----T-----GA-AGCCTAG-CCTGTCACCTGGAAATGTTTCAGACCT
CCACCCAGCCAACGTTTCAACTCCAGAGACA-----T-----TGTCACCTGGAAATGTTTCAGACCT
CCACCCAGCCAACGTTTCAACTCCAGAGACAACCTT-----AATGTTTCAGACCT
CCACCC-----agcctGA-AGCCTAG-CCTGTCACCTGGAAATGTTTCAGACCT
CCACCCAGCCA-----CCTGTCACCTGGAAATGTTTCAGACCT
CCACCCAGCCAACGTTTCAACTCCAGAGACA-----ACCTGGAAATGTTTCAGACCT
CCACCCAGCCAACGTTTCAACTCCAGAGAC----- (Δ 93 bp) -----

```

BsCas12a

```

CCACCCAGCCAACGTTTCAACTCCAGAGACAAC--TTGAAGCCTAGCCTGTCACCTGGAAATGTTTCAGACCTTTCAACC
CCACCCAGCCAACGTTTCAACTCCAGAGACAACgaagGAAGCCTAGCCTGTCACCTGGAAATGTTTCAGACCTTTCAACC
CCACCCAGCCAACGTTTCAACTCCAGAGACA--C--TTGAAGCCTAGCCTGTCACCTGGAAATGTTTCAGACCTTTCAACC
CCACCCAGCCAACGTTTCAACTCCAGAGACAAC---TGAAGCCTAGCCTGTCACCTGGAAATGTTTCAGACCTTTCAACC
CCACCCAGCCAACGTTTCAACTCCAGAGACA-----AAGCCTAGCCTGTCACCTGGAAATGTTTCAGACCTTTCAACC
CCACCCAGCCAACGTTTCAACTCCAGAGACA-----AGCCTAGCCTGTCACCTGGAAATGTTTCAGACCTTTCAACC
CCACCCAGCCAACGTTTCAACTCCAGAGACA-----GCCTAGCCTGTCACCTGGAAATGTTTCAGACCTTTCAACC
CCACCCAGCCAACGTTT-----AAGCCTAGCCTGTCACCTGGAAATGTTTCAGACCTTTCAACC

```

HkCas12a

```

CCACCCAGCCAACGTTTCAACTCCAGAGACAACCTTG-----AAGCCTAGCCTGT
CCACCCAGCCAACGTTTCAACTCCAGAGACAACCTTGccctgggatgcaaggctggttcaacatatgcaaatCTAGCCTGT
CCACCCAGCCAACGTTTCAACTCCAGAGACAACCTTgaagcctttg-----AAGCCTAGCCTGT
CCACCCAGCCAACGTTTCAACTCCAGAGACAACCTT-----AGCCTGT
CCACCCAGCCAACGTTTCAACTCCAGAGACA-----ggCTGT
CCACCCAGCCAACGTTTCAACTCCAGA-----CTAGCCTGT

```

LpCas12a

```

CCACCCAGCCAACGTTTCAACTCCAGAGACAACCTTGAAGCCTAGCCTGTCACCTGGAAATGTTTCAGACCTTTCAACCAC
CCACCCAGCCAACGTTTCAACTCCAGAGACA-----aGAAGCCTAGCCTGTCACCTGGAAATGTTTCAGACCTTTCAACCAC
CCACCCAGCCAACGTTTCAACTCCAGAGACAACCTcga-----AGCCTGTCACCTGGAAATGTTTCAGACCTTTCAACCAC
CCACCCAGCCAACGTTTCAACTCCAGAGACAACCT-----TGAAATGTTTCAGACCTTTCAACCAC

```

PrCas12a

```

CCACCCAGCCAACGTTTCAACTCCAGAGACAACCTTGAAGCCTAGCCTGTCACCTGGAAATGTTTCAGACCTTTCAACCAC
CCACCCAGCCAACGTTTCAACTCCAGAGACAAC--GAAGCCTAGCCTGTCACCTGGAAATGTTTCAGACCTTTCAACCAC
CCACCCAGCCAACGTTTCAACTCCAGAGACAACCT---GCCTAGCCTGTCACCTGGAAATGTTTCAGACCTTTCAACCAC
CCACCCAGCCAACGTTTCAACTCCAGAGACA-----AAGCCTAGCCTGTCACCTGGAAATGTTTCAGACCTTTCAACCAC
CCACCCAGCCAACGTTTCAACTCCAGAGACAAC-----TGAAATGTTTCAGACCTTTCAACCAC
CCACCCAGCCAACGTTTCAACTCCAGAGACA----- (Δ 118 bp) -----

```

PxCas12a

```

CCACCCAGCCAACGTTTCAACTCCAGAGACAACCTTGAAGCCTAGCCTGTCACCTGGAAATGTTTCAGACCTTTCAACCAC
CCACCCAGCCAACGTTTCAACTCCAGAGACAACCT---AGCCTAGCCTGTCACCTGGAAATGTTTCAGACCTTTCAACCAC
CCACCCAGCCAACGTTTCAACTCCAGAGAC-----AGCCTAGCCTGTCACCTGGAAATGTTTCAGACCTTTCAACCAC
CCACCCAGCCAACGTTTCAACTCCAGAGACA-----ggCTAGCCTGTCACCTGGAAATGTTTCAGACCTTTCAACCAC
CCACCCAGCCAACGTTTCAACTCCAGAGACAACCT-----GTCACCTGGAAATGTTTCAGACCTTTCAACCAC
CCACCCAGCCAACGTTTCAACTCCAGAGACAACCT-----GAAATGTTTCAGACCTTTCAACCAC
CCACCCAGCCAACG-----AAGCCTAGCCTGTCACCTGGAAATGTTTCAGACCTTTCAACCAC
CCACCCAGCCAACGTTTCAACTCC-----AGACCTTTCAACCAC

```

e

Human CD34 target 2

**BsCas12a**  
 GAAATGTTTCAGACCTTTCAACCCTAGCACTAGCCTTGCAACATCTCCCACTAAACCCTATACATCATCTTCTCCT  
 GAAATGTTTCAGACCTTTCAACCCTAGCACT-----TTGCAACATCTCCCACTAAACCCTATACATCATCTTCTCCT  
 GAAATGTTTCAGACCTTTCAACCCTAGCACTA-----GCAACATCTCCCACTAAACCCTATACATCATCTTCTCCT  
 GAAATGTTTCAGACCTTTCAACCCTAGCAC-----TGCAACATCTCCCACTAAACCCTATACATCATCTTCTCCT  
 GAAATGTTTCAGACCTTTCAACCCTAGCA-----TCTCCCACTAAACCCTATACATCATCTTCTCCT  
 GAAATGTTTCAGACCTTTCAACCCTAG-----CCACTAAACCCTATACATCATCTTCTCCT  
 GAAATGTTTCAGACCTTTCAACCCTA-----AACCCCTATACATCATCTTCTCCT  
 GAAATGTTTCAGACCTTTCAACCCTAG-----CCCTATACATCATCTTCTCCT

**HkCas12a**  
 GAAATGTTTCAGACCTTTCAACCCTAGCACTAGC---CTTGCAACATCTCCCACTAAACCCTATACATCATCTTC  
 GAAATGTTTCAGACCTTTCAACCCTAGCACT-----GCAACATCTCCCACTAAACCCTATACATCATCTTC  
 GAAATGTTTCAGACCTTTCAACCCTAGCACTAGCaagcCTTGCAACATCTCCCACTAAACCCTATACATCATCTTC  
 GAAATGTTTCAGACCTTTCAACCCTAGCACTA-----TGCAACATCTCCCACTAAACCCTATACATCATCTTC  
 GAAATGTTTCAGACCTTTCAACCCTAGCA-----CTTGCAACATCTCCCACTAAACCCTATACATCATCTTC  
 GAAATGTTTCAGACCTTTCAACCCTAGCACTAGC-----ACATCTCCCACTAAACCCTATACATCATCTTC  
 GAAATGTTTCAGACCTTTCAACCCTAGCACTA-----ACATCTCCCACTAAACCCTATACATCATCTTC  
 GAAATGTTTCAGACCTTTCAACCCTAGCACTA-----AACCCCTATACATCATCTTC

**LpCas12a**  
 GAAATGTTTCAGACCTTTCAACCCTAGCACTAGCCTTGCAACATCTCCCACTAAACCCTATACATCATCTTCTCCT  
 GAAATGTTTCAGACCTTTCAACCCTAGCACTAGC---CAACATCTCCCACTAAACCCTATACATCATCTTCTCCT  
 GAAATGTTTCAGACCTTTCAACCCTAGCACTAGCTTG---CATCTCCCACTAAACCCTATACATCATCTTCTCCT  
 GAAATGTTTCAGACCTTTCAACCCTAGCACTAGC-----AACATCTCCCACTAAACCCTATACATCATCTTCTCCT  
 GAAATGTTTCAGACCTTTCAACCCTAG-----CACTAAACCCTATACATCATCTTCTCCT  
 -----(Δ 80 bp)-----CTATACATCATCTTCTCCT  
 -----(Δ 83 bp)-----AACATCTCCCACTAAACCCTATACATCATCTTCTCCT

**PrCas12a**  
 GAAATGTTTCAGACCTTTCAACCCTAGCACTAGCCTTGCAACATCTCCCACTAAACCCTATACATCATCTTCTCCT  
 GAAATGTTTCAGACCTTTCAACCCTAGCACTAGC---TGCAACATCTCCCACTAAACCCTATACATCATCTTCTCCT  
 GAAATGTTTCAGACCTTTCAACCCTAGCACTAGCCTTGCA--ATCTCCCACTAAACCCTATACATCATCTTCTCCT  
 GAAATGTTTCAGACCTTTCAACCCTAGCACTA---TGCAACATCTCCCACTAAACCCTATACATCATCTTCTCCT  
 GAAATGTTTCAGACCTTTCAACCCTAGCACTA-----aATCTCCCACTAAACCCTATACATCATCTTCTCCT  
 GAAATGTTTCAGACCTTTCAAC-----CACTAAACCCTATACATCATCTTCTCCT

f

Mouse Nr1 target 1

**ArCas12a**  
 CTCAGTCCCAGAAATGGCTTTCCCTCCCAGTCCCTTGGCT-ATGGAATATGTTAATGACTTTGATTTGATGAAGTTCCG  
 CTCAGTCCCAGAAATGGCTTTCCCTCCCAGTCCCTTGGCTaATGGAATATGTTAATGACTTTGATTTGATGAAGTTCCG  
 CTCAGTCCCAGAAATGGCTTTCCCTCCCAGTCCCTT-GCT-ATGGAATATGTTAATGACTTTGATTTGATGAAGTTCCG  
 CTCAGTCCCAGAAATGGCTTTCCCTCCCAGTCCCTT---T-ATGGAATATGTTAATGACTTTGATTTGATGAAGTTCCG  
 CTCAGTCCCAGAAATGGCTTTCCCTCCCAGTCCCT-----gATATGTTAATGACTTTGATTTGATGAAGTTCCG  
 CTCAGTCCCAGAAATGGCTTTCCCTCCCAGTCCCTT-----tTGTTAATGACTTTGATTTGATGAAGTTCCG

**BsCas12a**  
 CTCAGTCCCAGAAATGGCTTTCCCTCCCAGTCCCTTGGCTATGGAATATGTTAATGACTTTGATTTGATGAAGTTCCG  
 CTCAGTCCCAGAAATGGCTTTCCCTCCCAGTCC-----CTATGGAATATGTTAATGACTTTGATTTGATGAAGTTCCG  
 CTCAGTCCCAGAAATGGCTTTCCCTCCCAGTCCCTT-----AATATGTTAATGACTTTGATTTGATGAAGTTCCG  
 CTCAGTCCCAGAAATGGCTTTCCCTCCCAGTCCCTT-----aATGTTAATGACTTTGATTTGATGAAGTTCCG  
 CTCAGTCCCAGAAATGGCTTTCC-----ACTTTGATTTGATGAAGTTCCG  
 CTCAGTCCCAGAAATGGCTTT-----GATTTGATGAAGTTCCG  
 CTCAGTCCCAGAAATGGCTTT-----ttTTTGAAGTTCCG

**HkCas12a**  
 CTCAGTCCCAGAAATGGCTTTCCCTCCCAGTCCCTTGGCTATGGAATATGTTAATGACTTTGATTTGATGAAGTTCCG  
 CTCAGTCCCAGAAATGGCTTTCCCTCCCAGTCCCTTGGCT---AATATGTTAATGACTTTGATTTGATGAAGTTCCG  
 CTCAGTCCCAGAAATGGCTTTCCCTCCCAGTCC-----ATGGAATATGTTAATGACTTTGATTTGATGAAGTTCCG  
 CTCAGTCCCAGAAATGGCTTTCCCTCCCAGTCCCTTGGC-----TTAATGACTTTGATTTGATGAAGTTCCG  
 CTCAGTCCCAGAAATGGCTTTCCCTCCCAGTCCCTT-----ATGTTAATGACTTTGATTTGATGAAGTTCCG

**LpCas12a**  
 CTCAGTCCCAGAAATGGCTTTCCCTCCCAGTCCCTTGGCTATGGAATATGTTAATGACTTTGATTTGATGAAGTTCCG  
 CTCAGTCCCAGAAATGGCTTTCCCTCCCAGTCCCTT-----TGGAATATGTTAATGACTTTGATTTGATGAAGTTCCG  
 CTCAGTCCCAGAAATGGCTTTCCCTCCCAGTCCCTT-----TGTTAATGACTTTGATTTGATGAAGTTCCG  
 CTCAGTCCCAGAAATGGCTTTCCCTCCCAGTCC-----ATGACTTTGATTTGATGAAGTTCCG

**PrCas12a**  
 CTCAGTCCCAGAAATGGCTTTCCCTCCCAGTCCCTTGGCTATGGAATATGTTAATGACTTTGATTTGATGAAGTTCCG  
 CTCAGTCCCAGAAATGGCTTTCCCTCCCAGTCCCTT-----AATATGTTAATGACTTTGATTTGATGAAGTTCCG  
 CTCAGTCCCAGAAATGGCTTTCCCTCCCAGTCC-----aGTTAATGACTTTGATTTGATGAAGTTCCG  
 CTCAGTCCCAGAAATGGCTTTCCCTCCCAGTCCCTT-----TTAATGACTTTGATTTGATGAAGTTCCG  
 CTCAGTCCCAGAAAT-----TTAATGACTTTGATTTGATGAAGTTCCG  
 CTCAGTCCCAGAAATG-----CTTTGATTTGATGAAGTTCCG  
 CTCAGTCCCAGAAATGGCTTTCCCTCCC-----AGTTCCG

**PxCas12a**  
 CTCAGTCCCAGAAATGGCTTTCCCTCCCAGTCCCTTGGCTATGGAATATGTTAATGACTTTGATTTGATGAAGTTCCG  
 CTCAGTCCCAGAAATGGCTTTCCCTCCCAGTCCCT---TATGGAATATGTTAATGACTTTGATTTGATGAAGTTCCG  
 CTCAGTCCCAGAAATGGCTTTCCCTCCCAGTCCCTT-----AATATGTTAATGACTTTGATTTGATGAAGTTCCG  
 CTCAGTCCCAGAAATGGCTTTCCCTCCCAGTCC-----AATATGTTAATGACTTTGATTTGATGAAGTTCCG  
 CTCAGTCCCAGAAATGGCTTTCCCTCCCAGTCC-----AATATGTTAATGACTTTGATTTGATGAAGTTCCG  
 CTCAGTCCCAGAAATG-----CTTTGATTTGATGAAGTTCCG

**Figure S3.** Six new Cas12a proteins mediated robust genome editing in mammalian cells. **a** (*Upper*) Diagram of Cas12a expression vector driven by the CAG promoter. (*Lower*) Immunofluorescence staining of the tested 12 HA-tagged Cas12a proteins in human HeLa cells. NLS, nuclear localization signal. Scale bars, 20  $\mu\text{m}$ . **b** (*Left*) Schematic showing the sequence of crRNAs targeting one human and two mouse gene sites with the requisite 5'-TTTN PAM. (*Right*) T7EI analysis of targeted indel frequencies generated by the six Cas12a orthologs as indicated. AsCas12a was used as positive control. GFP, an empty backbone vector without Cas12a protein expression. M, DNA marker. **c** (*Left*) Schematic showing the sequence of crRNA targeting one human and one mouse gene sites with the requisite 5'-TTN PAM. (*Right*) T7EI analysis of targeted indel frequencies generated by the six Cas12a orthologs and AsCas12a as indicated. GFP, an empty backbone vector without Cas12a protein expression. M, DNA marker. **d-f** Representative targeted human *CD34* sequences observed in [Figure 1b](#) and [Figure S3b](#), and targeted mouse *Nr1* sequences observed in [Figure S3c](#). The PAM sequences were colored red. Green dashes and blue lowercases indicated deletions and insertions, respectively.

a

Human AAVS1 target site 1

GTGGAAAAC TCCC TTGTGAGAATGGTGCCTCC ---TAGGTGTTACCAGGTCGTGGCCGCCTCTACTCCCTTTCTC  
GTGGAAAAC TCCCTTTGTGAGAATGGTGCCTCCctaTAGGTGTTACCAGGTCGTGGCCGCCTCTACTCCCTTTCTC  
GTGGAAAAC TCCCTTTGTGAGAATGGTGCCTCCcacc---acccatttCCAGGTCGTGGCCGCCTCTACTCCCTTTCTC  
GTGGAAAAC TCCCTTTGTGAGAATGGTGCCTCC---TAGGTGTTACCAGGTCGTGGCCGCCTCTACTCCCTTTCTC  
GTGGAAAAC TCCCTTTGTGAGAATGGTGCCTCC-----GGTGTTCACCAGGTCGTGGCCGCCTCTACTCCCTTTCTC

Human AAVS1 target site 2

GTGGAAAAC TCCC TTGTGAGAATGGTGCCTCC TAGGTGTTACCAGGTCGTGGCCGCCTCTACTCCCTTTCTC  
GTGGAAAAC TCCCTTTGTGAGAATGGTGCCTCC---GGTGTTCACCAGGTCGTGGCCGCCTCTACTCCCTTTCTC  
GTGGAAAAC TCCCTTTGTGAGAATGGTGCCTCC-----TCTACTCCCTTTCTC

Human AAVS1 target site 3

TGCGTCCTAGGTG TTC ACCAGGTCGTGGCCGCCTCTACTCCCTTTCTC TTTCTCCATCCTTCTTTCTTAAAGAGTC  
TGCGTCCTAGGTG TTC ACCAGGTCGTGGCCGCCTCTACT---CCTTTCTC TTTCTCCATCCTTCTTTCTTAAAGAGTC  
TGCGTCCTAGGTG TTC ACCAGGTCGTGGCCGCCT---ACTCCCTTCTC TTTCTCCATCCTTCTTTCTTAAAGAGTC  
TGCGTCCTAGGTG TTC ACCAGGTCGTGGCCGCCTC-----CCTTTCTC TTTCTCCATCCTTCTTTCTTAAAGAGTC

Human AAVS1 target site 4

AGGAGGGGGGTG TCCGTGTGGAAAAC TCCCTTT-----GTGAGAATGGTGCCTC  
AGGAGGGGGGTG TCCGTGTGGAAAAC TCCCTTTtgttcgcagttaatagtttgcgcaacgGTGAGAATGGTGCCTC  
AGGAGGGGGGTG TCCGTGTGGAAAAC TCCCTTT-----GAGAATGGTGCCTC  
AGGAGGGGGGTG TCCGTGTGGAAAAC T-----acAATGGTGCCTC

Human AAVS1 target site 5

GGCGCTCAGGCTG TCCGTGTGGAAAAC TCCCTTTCCCTCGTCCAC---CATCTCATGCCCTGGCTCTCCTGCCCTTCCCTACAGG  
GGCGCTCAGGCTG TCCCTGTCCCTTCCCTCGTCCACcaCATCTCATGCCCTGGCTCTCCTGCCCTTCCCTACAGG  
GGCGCTCAGGCTG TCCCTGTCCCTTCCCTC-----ATGCCCTGGCTCTCCTGCCCTTCCCTACAGG  
GGCGCTCAGGCTG TCCCTGTCCCTTCCCTG-----TGCCCTGGCTCTCCTGCCCTTCCCTACAGG

Human AAVS1 target site 6

TCCGTGTGGAAAAC TCCCTTTGTGAGAATGGTGCCTTAGGTGTTACCAGGTCGTGGCCGCCTCTACTCCCTTTCTC  
TCCGTGTGGAAAAC TCCCTTTGTGAGAAT---TGCGTCCTAGGTGTTACCAGGTCGTGGCCGCCTCTACTCCCTTTCTC  
TCCGTGTGGAAAAC TCCCTTTGTGAGAATG-----CTAGGTGTTACCAGGTCGTGGCCGCCTCTACTCCCTTTCTC  
TCCGTGTGGAAAAC TCCCTT-----GCGTCTAGGTGTTACCAGGTCGTGGCCGCCTCTACTCCCTTTCTC  
TCCGTGTGGAAAAC TCCCTTTGTGAGAAcg-----GTTACCAGGTCGTGGCCGCCTCTACTCCCTTTCTC  
TCCGTGTGGAAAAC TCCCTTTGTGA-----GTTACCAGGTCGTGGCCGCCTCTACTCCCTTTCTC

Human AAVS1 target site 7

CTCTCCTGCCCTG TCCCTACAGGGGTTCCCTGGCT---CTGCTCTCAGACTGAGCCCCGTTCCCTGCATCCCCGTTCC  
CTCTCCTGCCCTG TCCCTACAGGGGTTCCCTGGCTtCTGCTCTCAGACTGAGCCCCGTTCCCTGCATCCCCGTTCC  
CTCTCCTGCCCTG TCCCTACAGGGGTTCCCTG-----CTCTCAGACTGAGCCCCGTTCCCTGCATCCCCGTTCC  
CTCTCCTGCCCTG TCCCTACAGGGGTTCCCTG-----agCTCTCAGACTGAGCCCCGTTCCCTGCATCCCCGTTCC  
CTCTCCTGCCCTG TCCCTACAGGGGTTCCCTG-----GACTGAGCCCCGTTCCCTGCATCCCCGTTCC

Human CCR5 target site 1

GCTTGTCATGGTCAT CTGCTACTCGGGAATCCTAAAACTCTGCTTCGGTGTGCGAAATGAGAAGAAGAGGCACAGGG  
GCTTGTCATGGTCAT CTGCTACTCGGGAATCCTAAAA---GCTTCGGTGTGCGAAATGAGAAGAAGAGGCACAGGG  
GCTTGTCATGGTCAT CTGCTACTCGGGAATCCTAA-----TGCTTCGGTGTGCGAAATGAGAAGAAGAGGCACAGGG  
GCTTGTCATGGTCAT CTGCTACTCGGGAATCCTA-----TGCTTCGGTGTGCGAAATGAGAAGAAGAGGCACAGGG  
GCTTGTCATGGTCAT CTGCTACTCGGGAATCCTAA-----TCGGTGTGCGAAATGAGAAGAAGAGGCACAGGG

Human CCR5 target site 2

TGTTTATTTTCTCT CTGCGCTCCCTACAACATTGCTCTTCTCCTGAACACCTTCCAGGAATCTTTGGCCTGAATA  
TGTTTATTTTCTCT CTGCGCTCCCTACAACATTGT---aTCTCCTGAACACCTTCCAGGAATCTTTGGCCTGAATA  
TGTTTATTTTCTCT CTGCGCTCCCTACAACATTG---CTCCTGAACACCTTCCAGGAATCTTTGGCCTGAATA  
TGTTTATTTTCTCT CTGCGCTCCCTACAACATTG-----TCCTGAACACCTTCCAGGAATCTTTGGCCTGAATA  
TGTTTATTTTCTCT CTGCGCTCCCTACAACATTG-----gCTGAACACCTTCCAGGAATCTTTGGCCTGAATA  
TGTTTATTTTCTCT CTGCGCTCCCTACA-----CTGAACACCTTCCAGGAATCTTTGGCCTGAATA

HkCas12a

HkCas12a

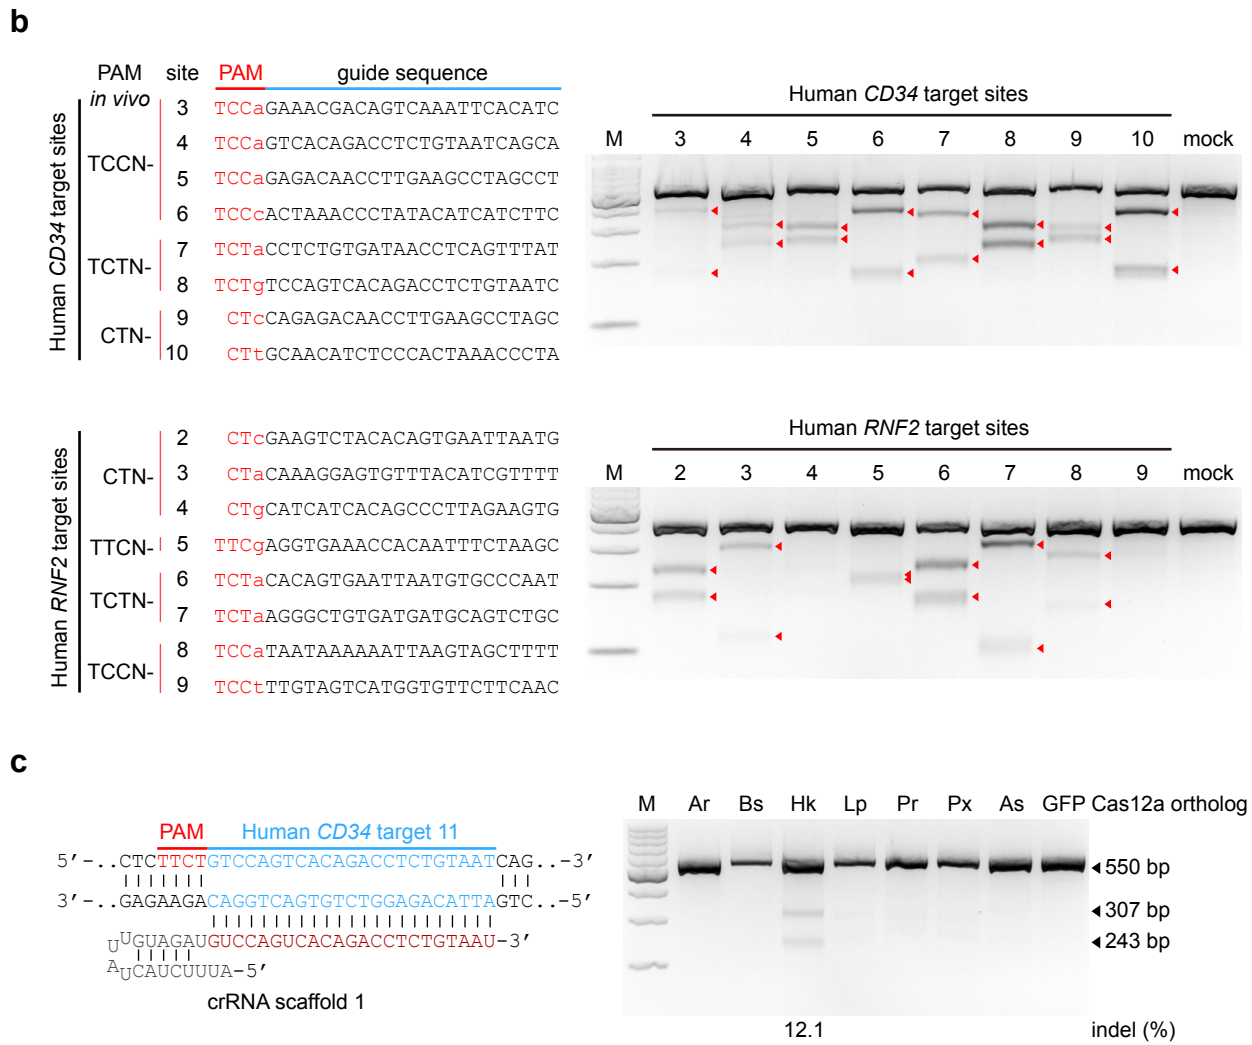

**Figure S4.** Increased genome-wide coverage of HkCas12a with altered PAMs. **a** Representative sequences of mutated alleles in the human *AAVS1* and *CCR5* loci indicated HkCas12a-crRNA1 edited the human genome recognizing 5'-YTN, 5'-TYN, 5'-TTYN and 5'-TCCN PAMs. The PAM sequences were colored red. Green dashes and blue lowercases indicated deletions and insertions, respectively. **b** (*Left*) Cas12a target sequences with indicated PAM sequences in the human *CD34*, *RNF2* and *CCR5* loci. (*Right*) T7EI analysis indicated that HkCas12a-crRNA1 targeted the human genome recognizing 5'-CTN and 5'-TYYN PAMs. Red triangles indicate cleavage bands. mock, an U6 empty vector without crRNA expression. M, DNA marker. **c** (*Left*) Schematic showing the crRNA targeting human *CD34* site 11. (*Right*) T7EI assay indicated that HkCas12a induced targeted indels directed by 5'-TTCN PAM. GFP, an empty backbone vector without Cas12a protein expression. M, DNA marker.

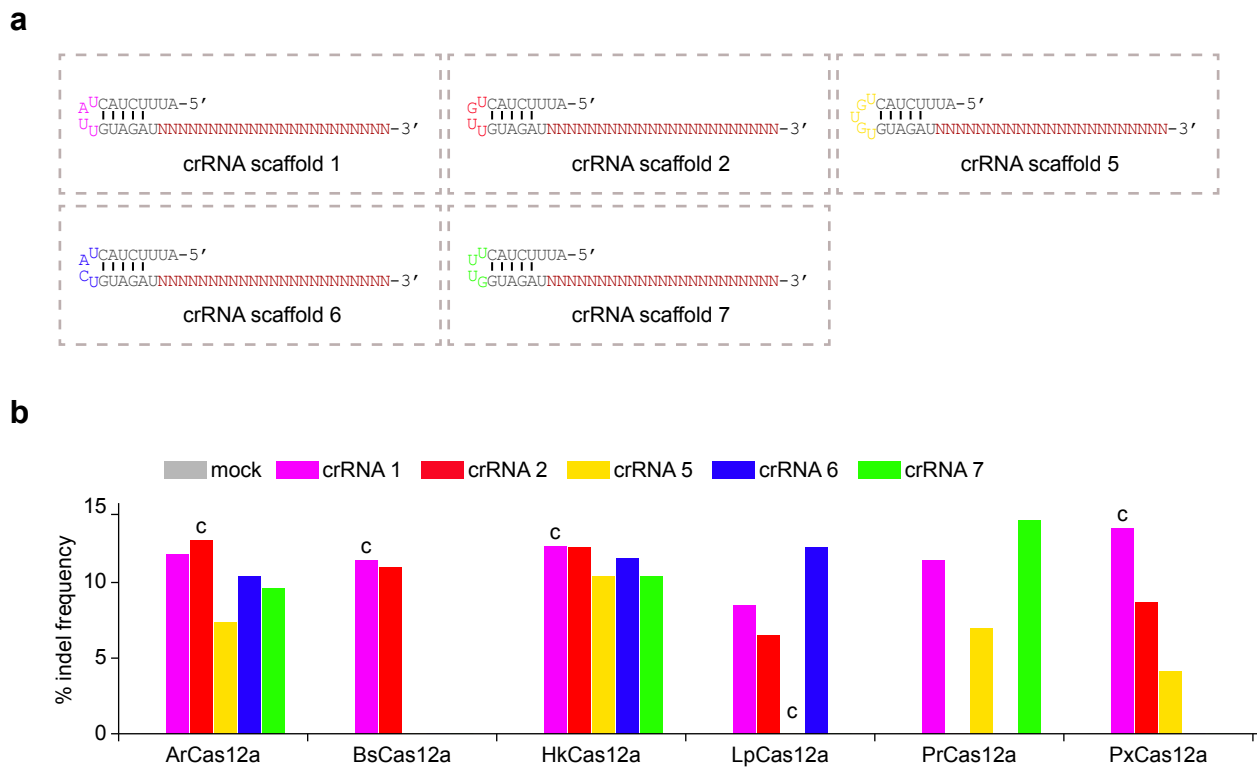

**Figure S5.** crRNA scaffold alters targeted indel efficiencies of Cas12a proteins. **a** Schematic showing the five crRNA scaffolds. Scaffold 1, 2 and 5 cover all cases of naturally existed crRNA scaffolds in this study, while scaffold 6 and 7 are two artifacts not found in nature. **b** Efficiencies of targeted indel mutations in the *MeCP2* locus in mES cells mediated by the five crRNA scaffolds with individual Cas12a-family protein were calculated by T7EI assay. Cognate crRNA was indicated with a “c” on the column. mock, an U6 empty vector without crRNA expression.



**a**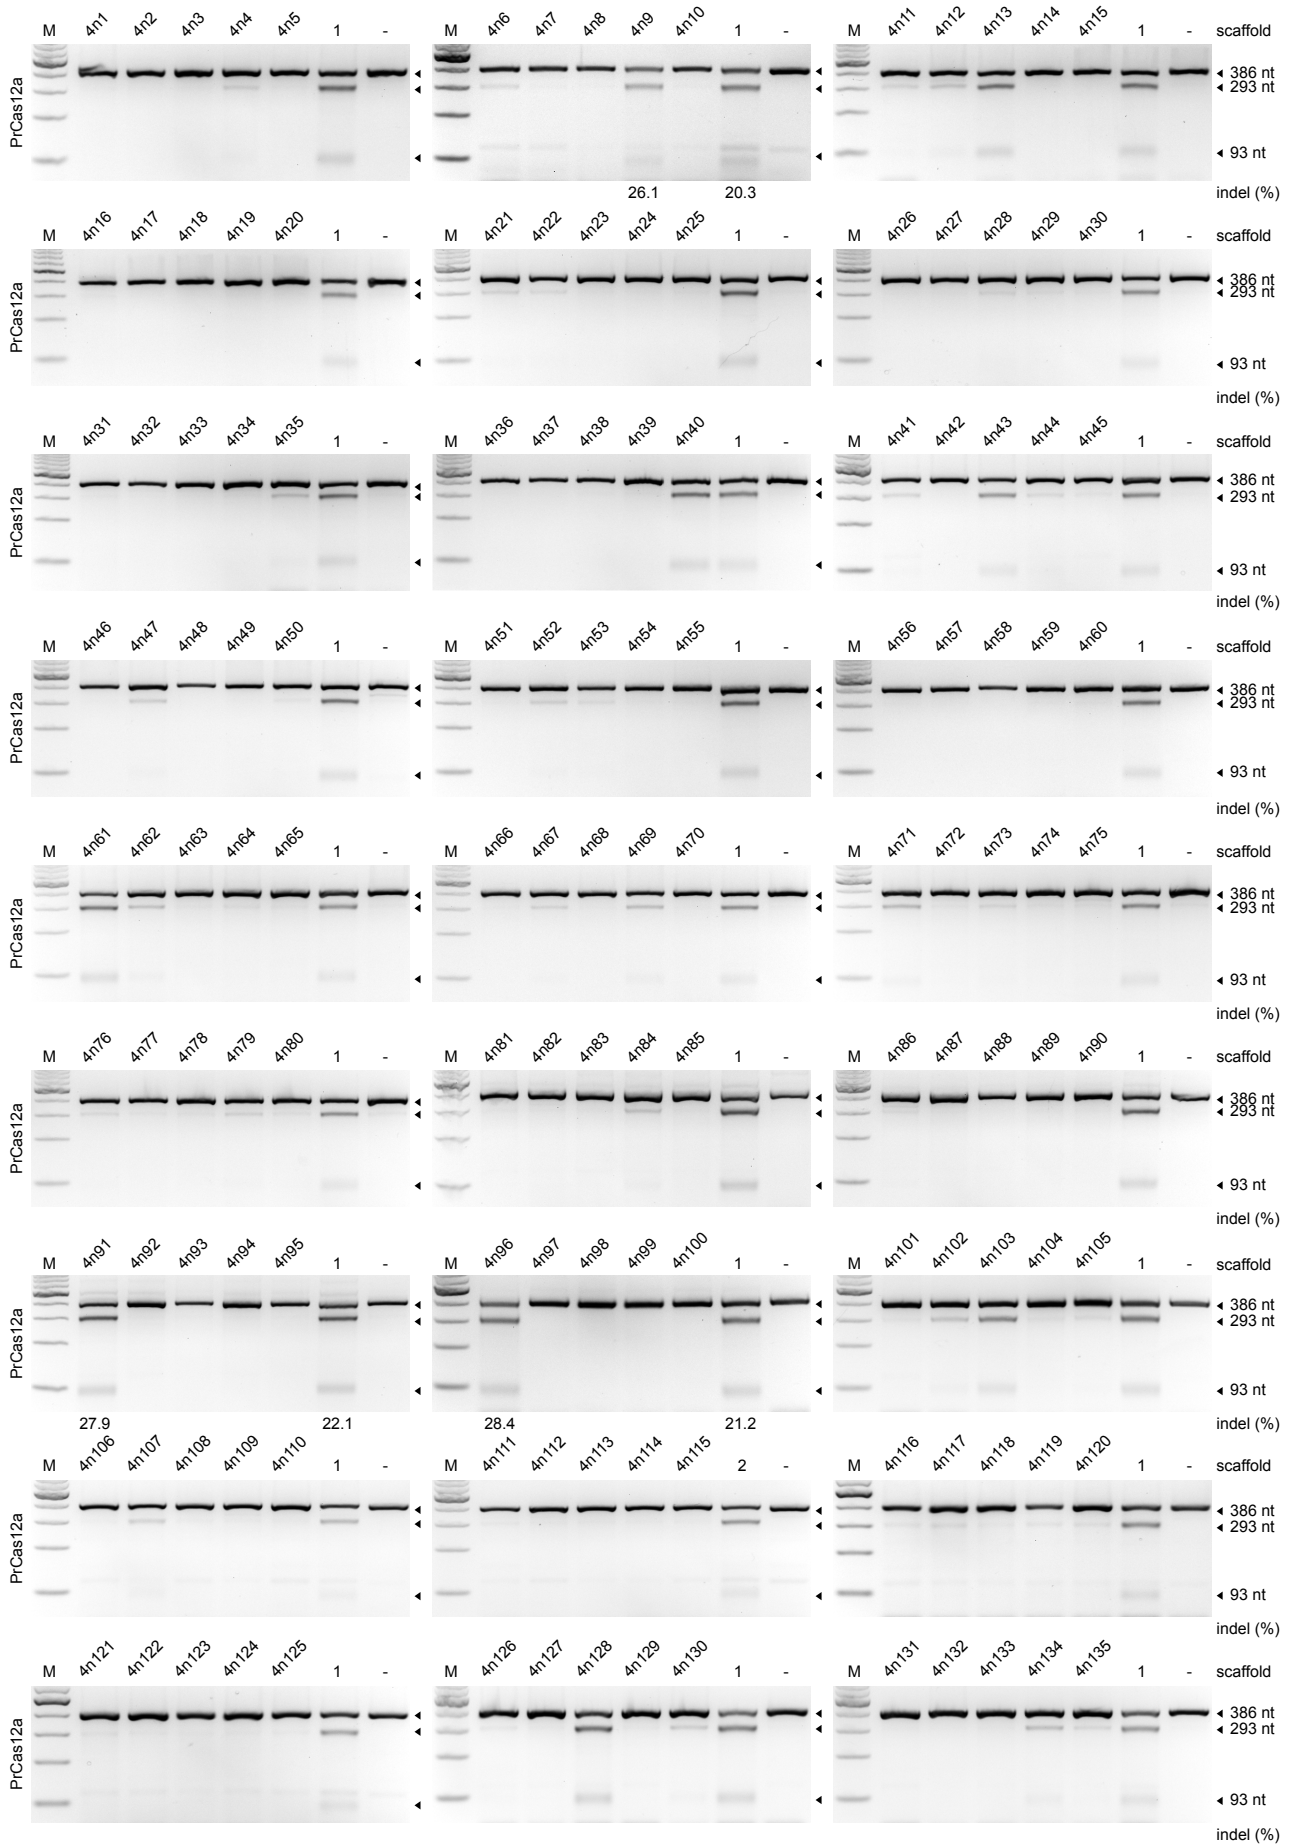

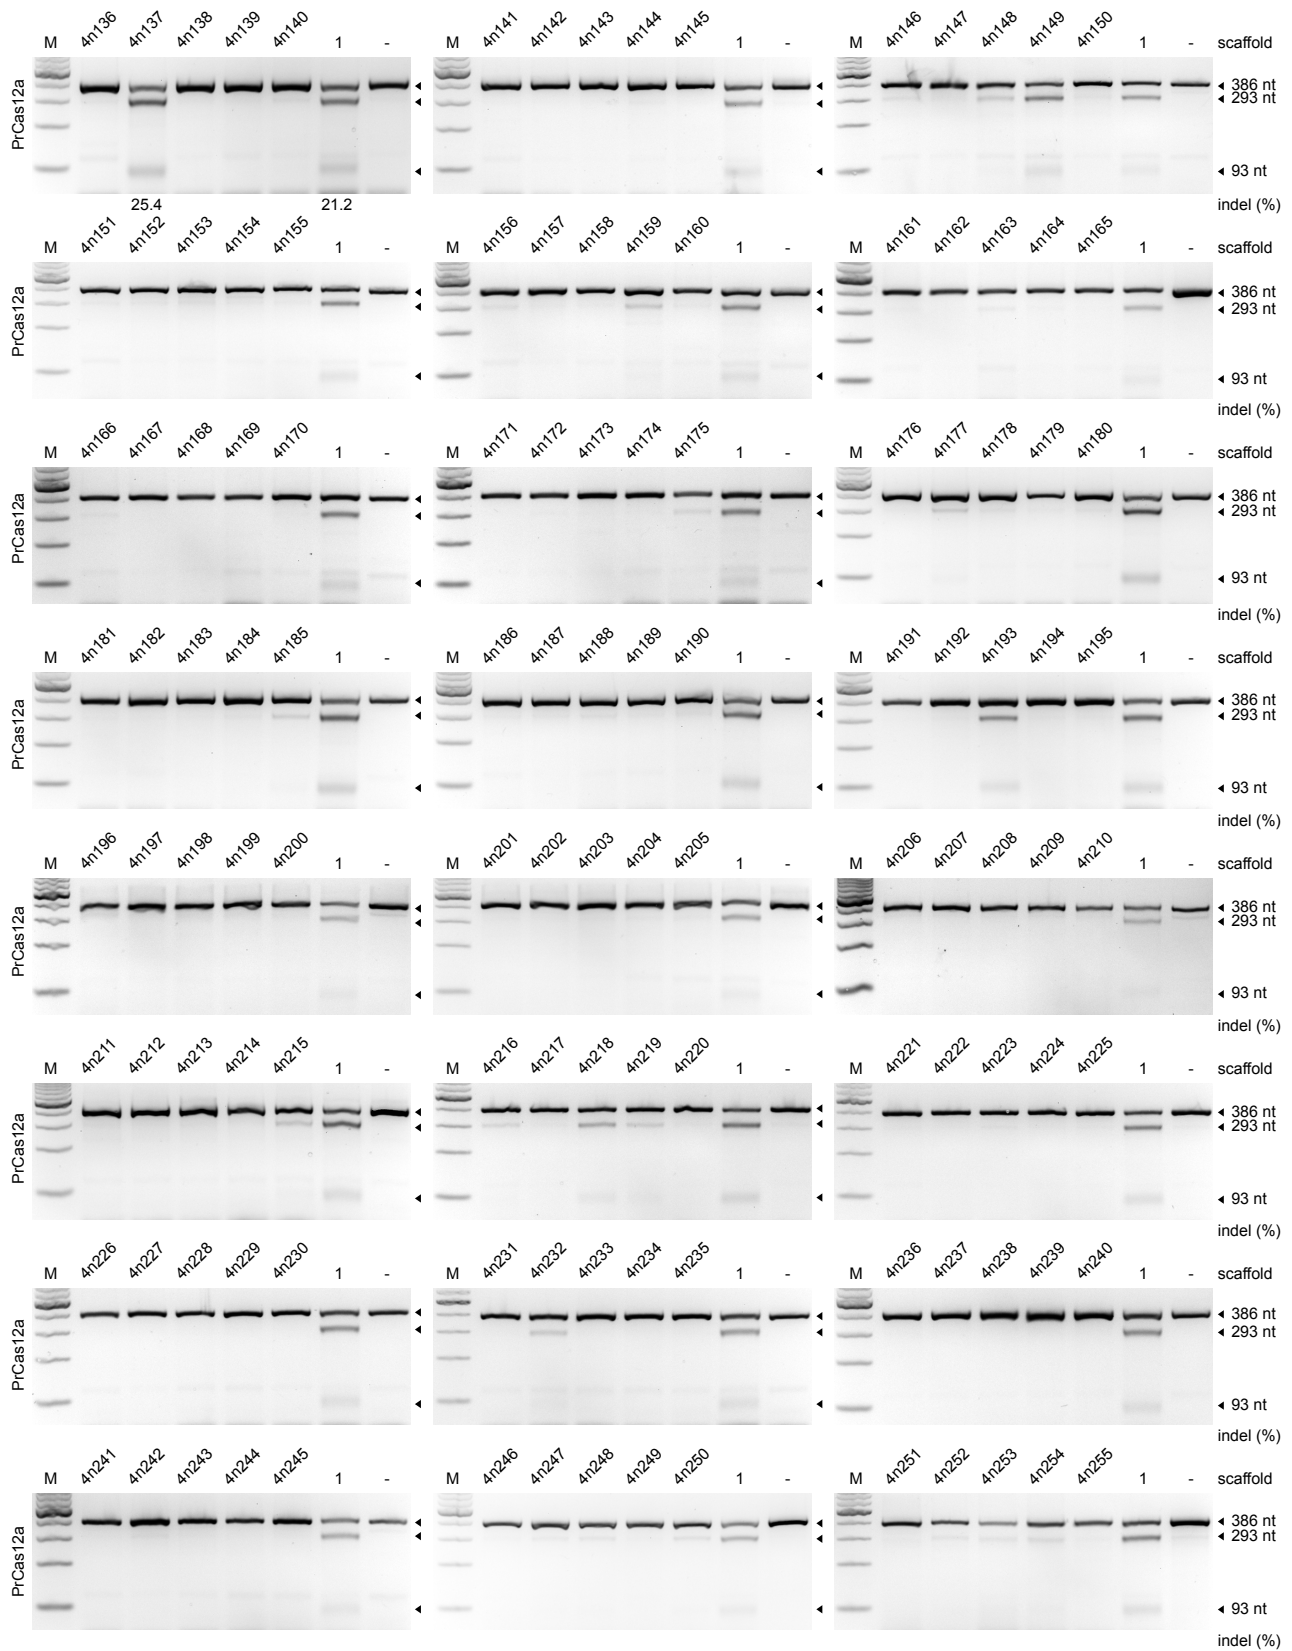

**b**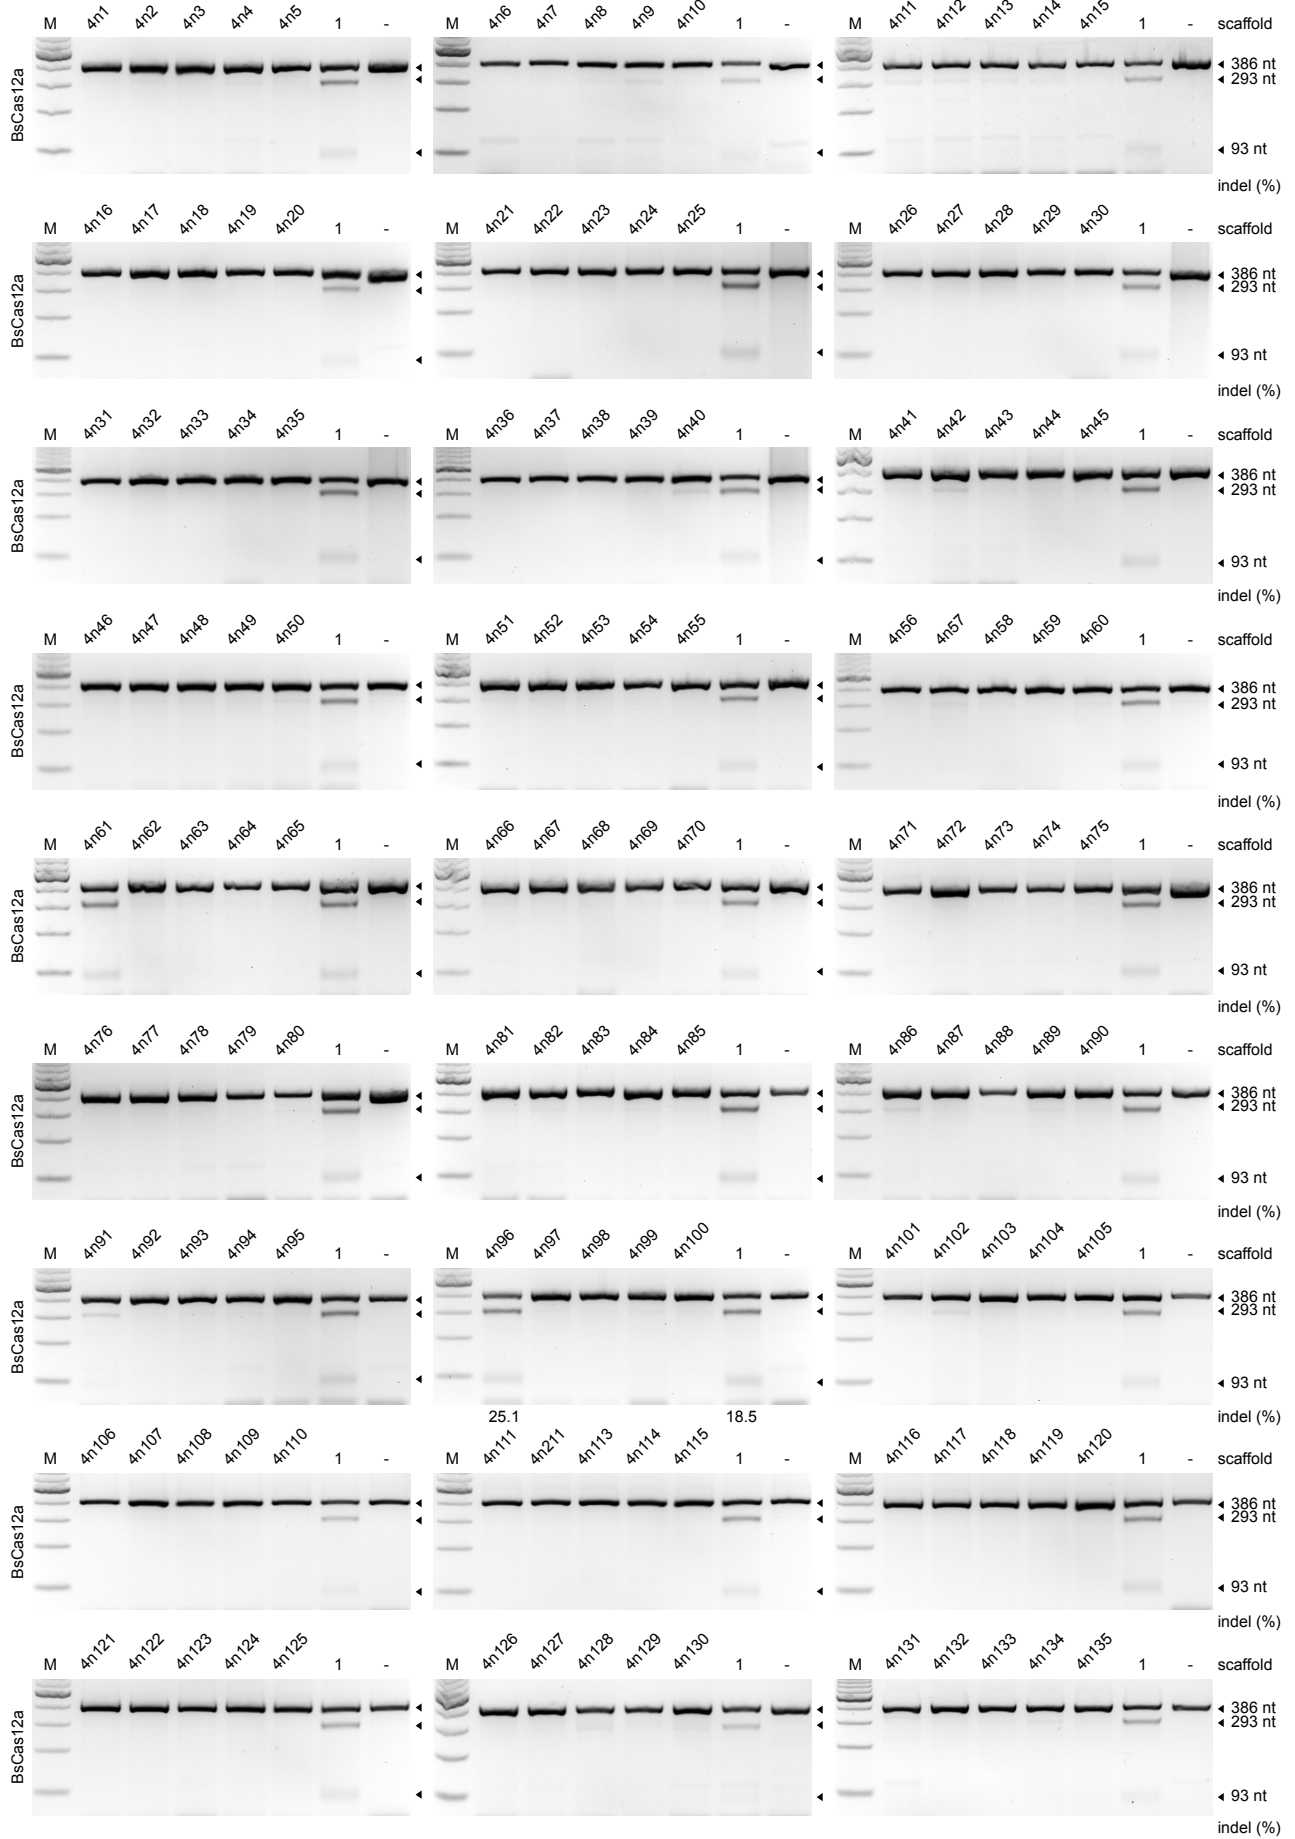

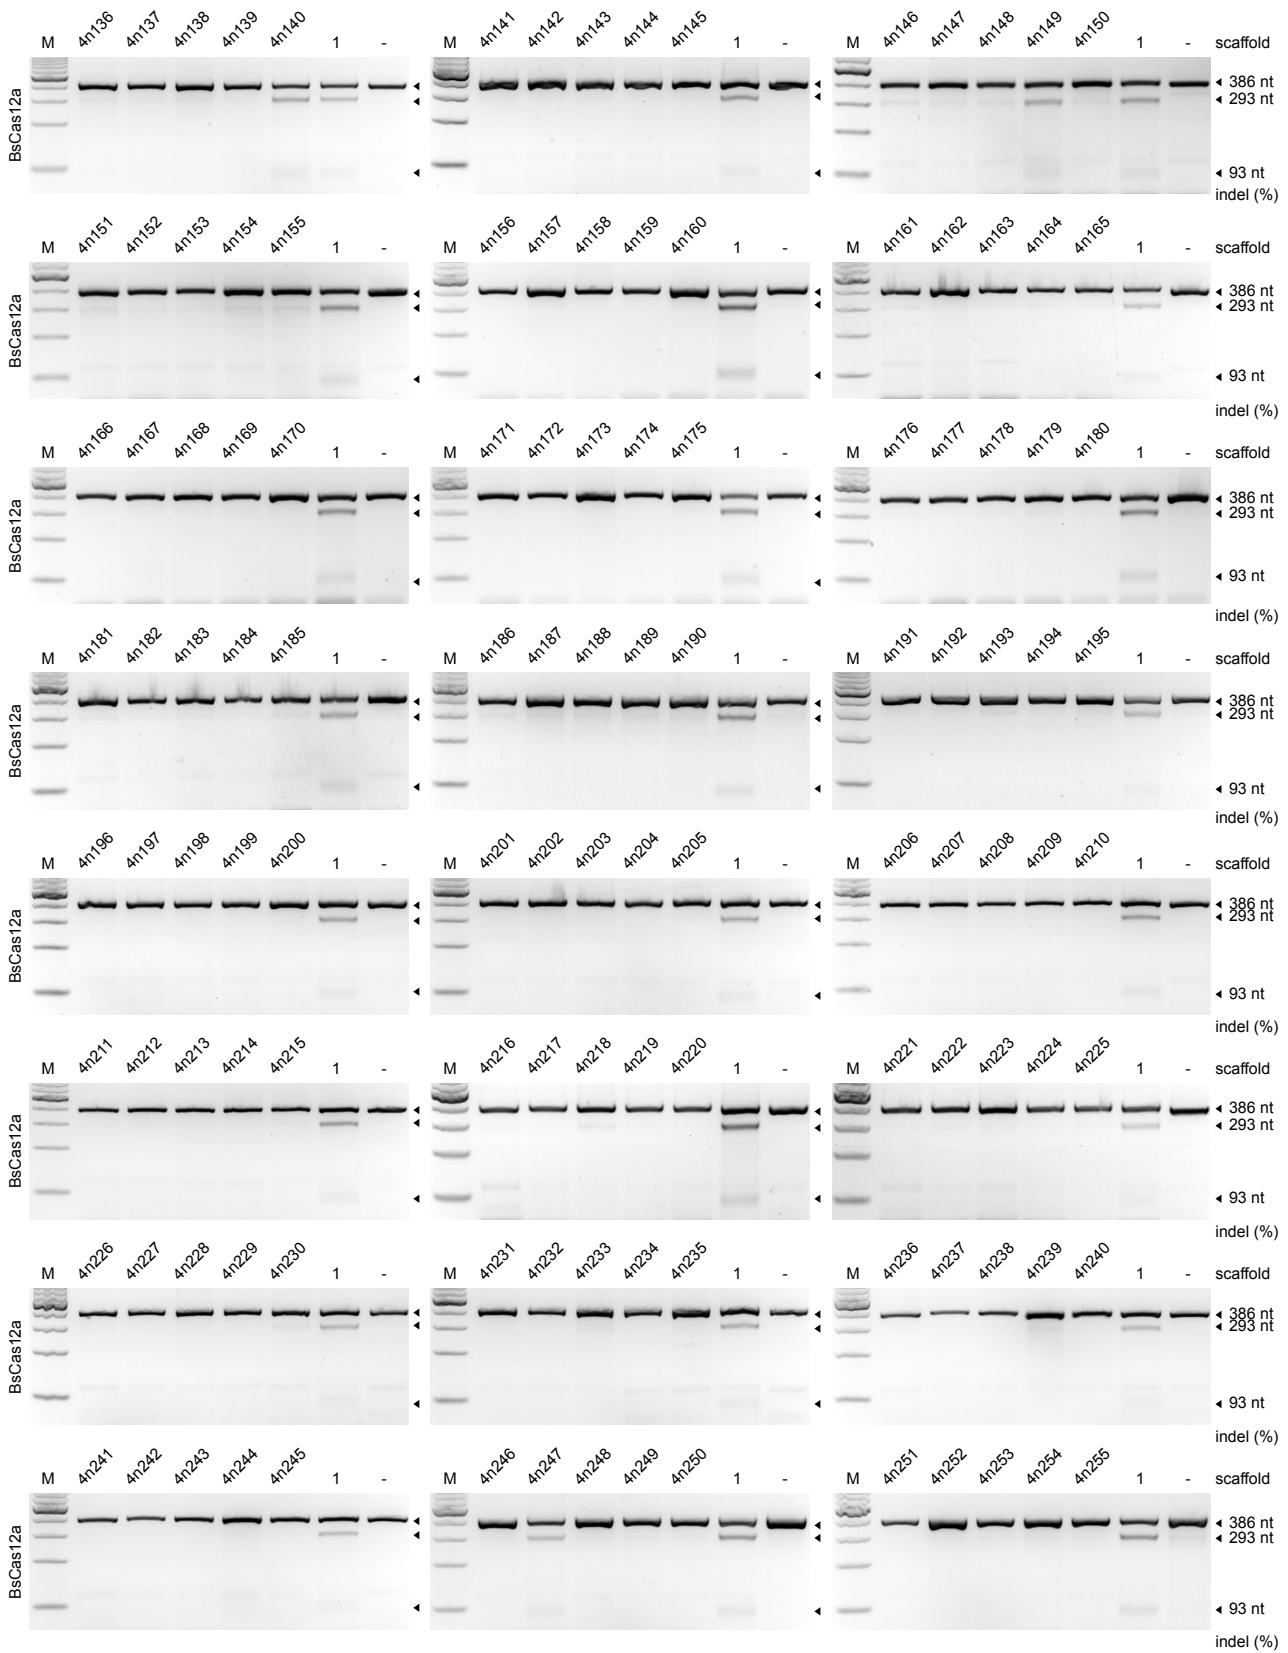

**c**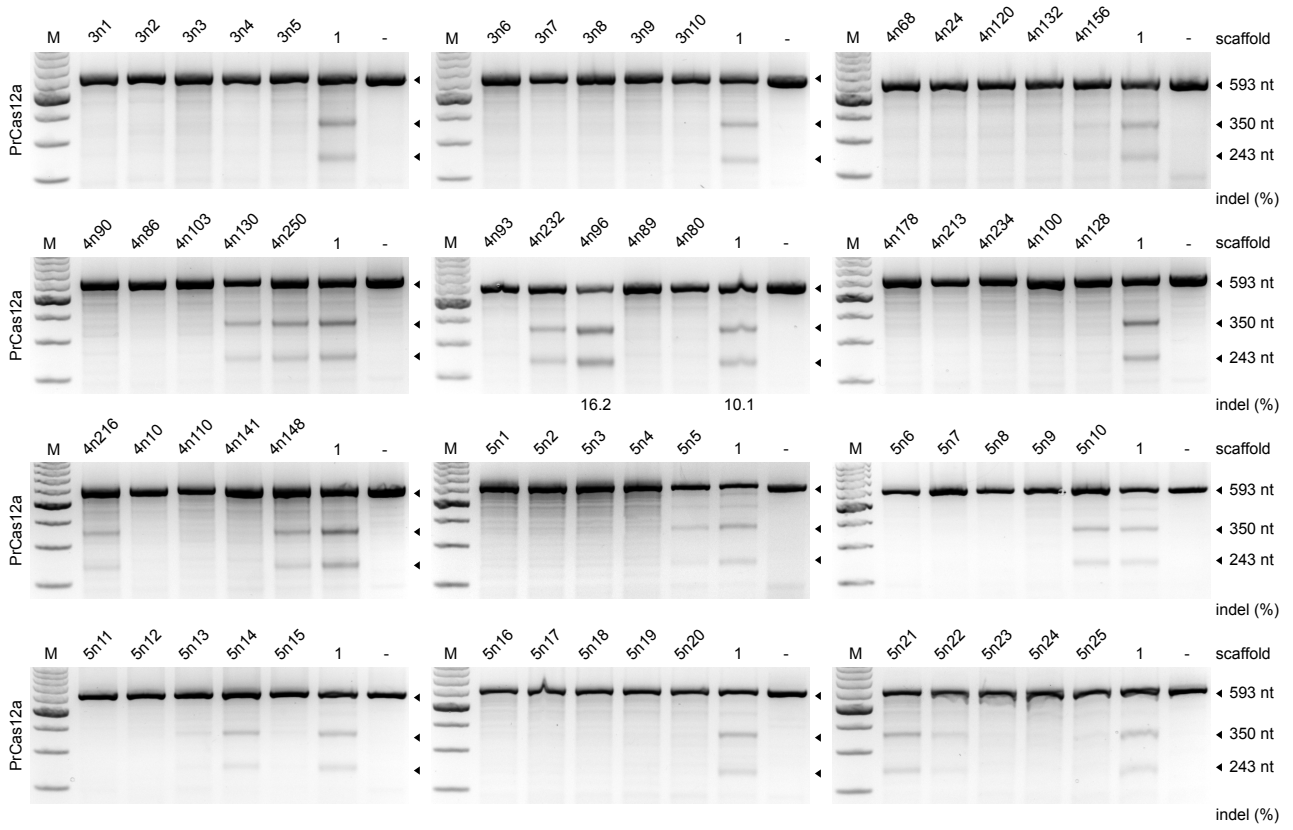**d**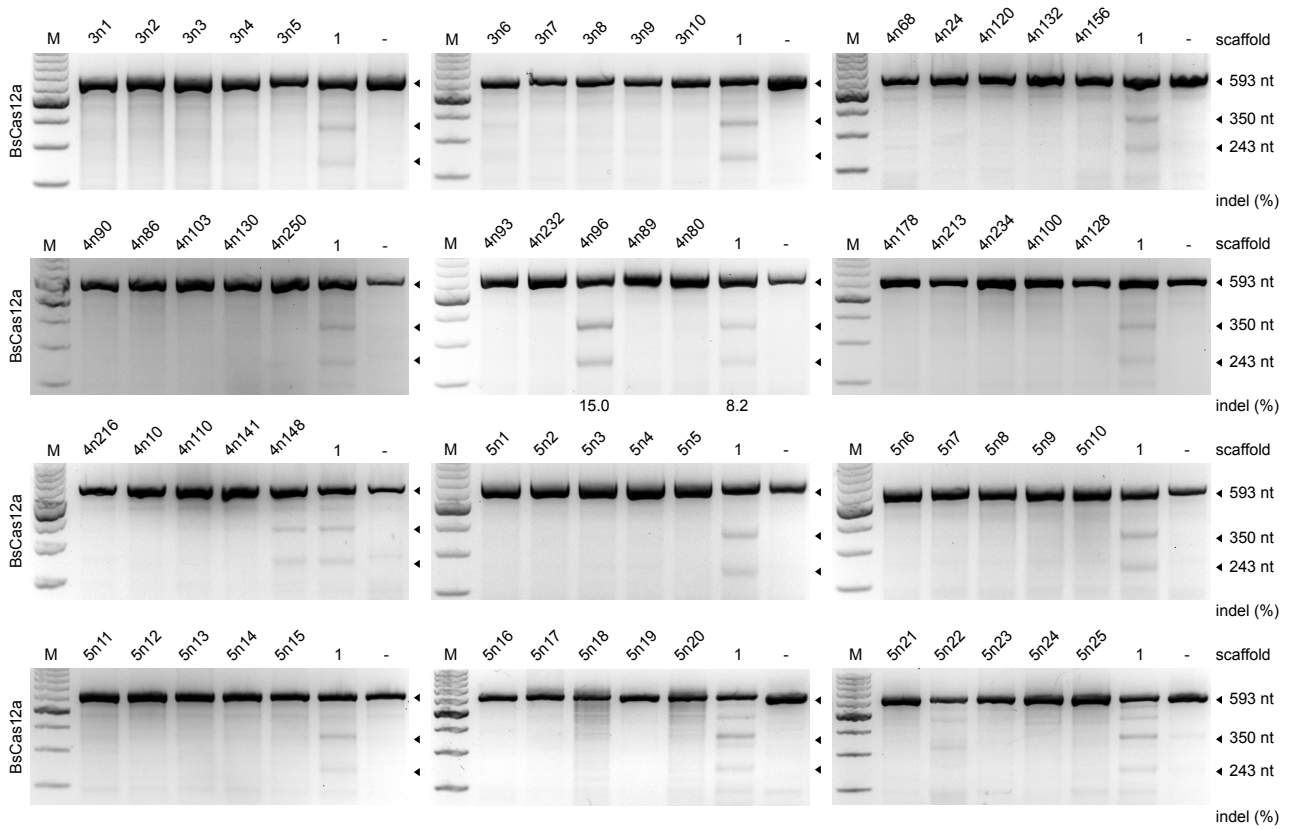

**Figure S6.** crRNA scaffold optimization and screening. **a-b** 256 crRNA scaffolds with all possible 4 nt-loop were used for genome editing screening with PrCas12a (**a**) and BsCas12a (**b**) in the *Nrl* locus in mES cells and T7EI assay was applied. Enhanced indels compared with scaffold 1 were labelled. -, an U6 empty vector without crRNA expression. M, DNA marker. **c-d** Target indels produced in the *MeCP2* locus in mES cells by PrCas12a (**c**) and BsCas12a (**d**) with crRNA scaffolds bearing mutations within 3 nt-, 4 nt- or 5 nt-loop. Enhanced indels compared with scaffold 1 were labelled. -, an U6 empty vector without crRNA expression. M, DNA marker.

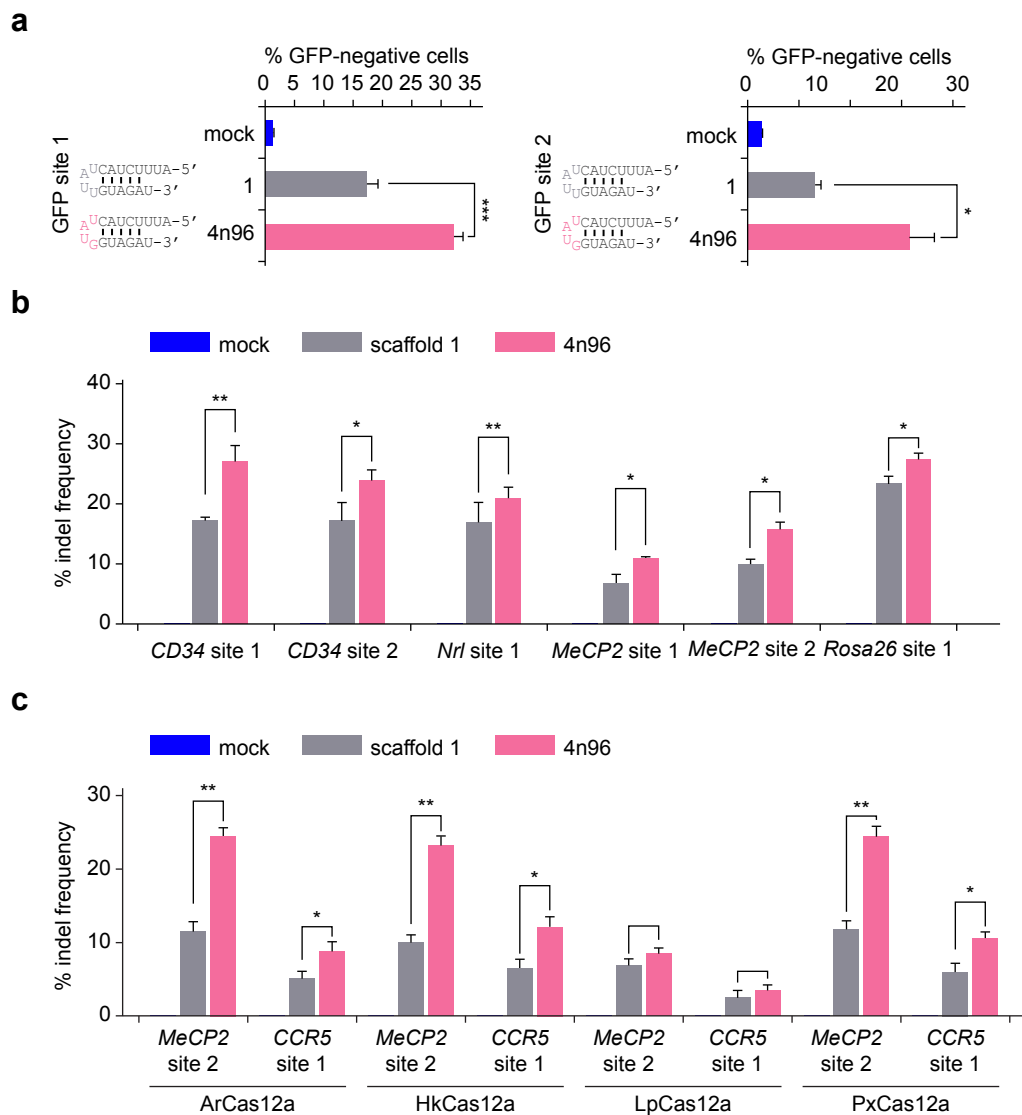

**Figure S7.** Enhanced targeted efficiency with optimized crRNA scaffold. **a** Efficiencies of GFP disruption in human 293FT cells mediated by BsCas12a with crRNA scaffold 4n96 and 1. Error bars indicate standard errors of the mean (s.e.m.),  $n = 3$ . \* and \*\*\* mean  $p$  value  $< 0.05$  and  $0.001$ , respectively. mock, an U6 empty vector without crRNA expression. **b** T7EI analysis of targeted mutation efficiencies induced at six different endogenous loci by scaffold 4n96 and 1 combined with BsCas12a. Error bars indicate s.e.m.,  $n = 3$ . \* means  $p$  value  $< 0.05$  and \*\* means  $p$  value  $< 0.01$ . **c** T7EI analysis of targeted mutation efficiencies induced at two different endogenous loci by scaffold 4n96 and 1 combined with individual Cas12a. Error bars indicate s.e.m.,  $n = 3$ . \* means  $p$  value  $< 0.05$  and \*\* means  $p$  value  $< 0.01$ .

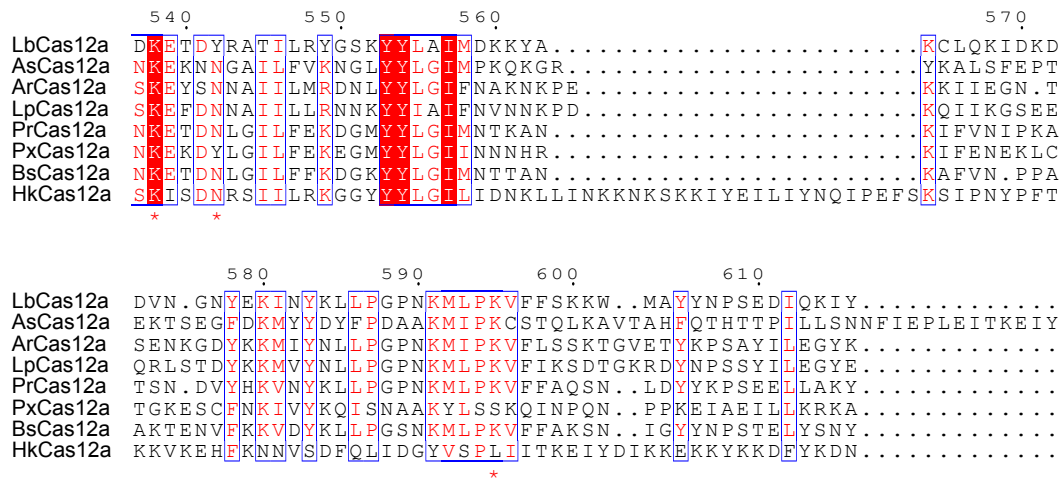

**Figure S8.** Conserved residues in PAM-interacting (PI) domain of Cas12a proteins. The three residues in the PI domain responsible for PAM recognition are indicated with red asterisk. In HkCas12a, L642 equivalent to K592 of LbCas12a, is not conserved.
