# Supplementary material for: Enhanced mammalian genome editing by new Cas12a orthologs with optimized crRNA scaffolds
Source: PubMed Central journal article supplement (PMC6362571; doi:10.1186/s13059-019-1620-8), 2019-02-05
Supplement: 13059_2019_1620_MOESM4_ESM.pdf [file 13059_2019_1620_MOESM4_ESM.pdf]

**Table S2. Sequences of targeting crRNAs used for *in vitro* RNA transcription.** Targeting crRNAs bear the 5' T7 promoter sequence. The purchased oligos were annealed to form dsDNA templates. Sequences of T7 promoter and crRNA scaffolds were highlighted in blue and red fonts, respectively.

| crRNA ID | crRNA sequences (5' - 3')                                          |
|----------|--------------------------------------------------------------------|
| crRNA1-F | TAATACGACTCACTATAGGATTTCTACTATTGTAGATAGGAGTGTTCA<br>GTCTCCGTGAAC   |
| crRNA1-R | G TTCACGGAGACTGAACACTCCTATCTACAATAGTAGAAATCCTATAG<br>TGAGTCGTATTA  |
| crRNA2-F | TAATACGACTCACTATAGGATTTCTACTGTTGTAGATAGGAGTGTTCA<br>GTCTCCGTGAAC   |
| crRNA2-R | G TTCACGGAGACTGAACACTCCATCTACAACAGTAGAAATCCTATAG<br>TGAGTCGTATTA   |
| crRNA5-F | TAATACGACTCACTATAGGATTTCTACTGTGTGTAGATAGGAGTGTTCA<br>AGTCTCCGTGAAC |
| crRNA5-R | G TTCACGGAGACTGAACACTCCTATCTACACACAGTAGAAATCCTATA<br>GTGAGTCGTATTA |

**Table S3. Target sequences harboring various 5' PAM sequences used for *in vitro* DNA cleavage assay.** Synthesized oligos containing the protospacer targeting sequences and adjacent 5' PAMs were annealed and constructed into EcoRI and SphI double-digested p11-LacY-wtx1 vector. 5' EcoRI overhang and 3' SphI overhang were highlighted in yellow and green backgrounds, respectively. The 5' PAM sequences were colored red.

| PAM ID      | Target sequences (5' to 3')           | 5' PAM sequences |
|-------------|---------------------------------------|------------------|
| p11-PMA1-F  | AATTATTNAGGAGTGTTTCAGTCTCCGTGAACCATG  | <u>TTN</u>       |
| p11-PMA1-R  | G TTCACGGAGACTGAACACTCCTNAAAT         |                  |
| p11-PMA2-F  | AATTATTNAGGAGTGTTTCAGTCTCCGTGAACCATG  | <u>ATTN</u>      |
| p11-PMA2-R  | G TTCACGGAGACTGAACACTCCTNAATT         |                  |
| p11-PMA3-F  | AATTAGTTNAGGAGTGTTTCAGTCTCCGTGAACCATG | <u>GTTN</u>      |
| p11-PMA3-R  | G TTCACGGAGACTGAACACTCCTNAACT         |                  |
| p11-PMA4-F  | AATTACTTNAGGAGTGTTTCAGTCTCCGTGAACCATG | <u>CTTN</u>      |
| p11-PMA4-R  | G TTCACGGAGACTGAACACTCCTNAAGT         |                  |
| p11-PMA5-F  | AATTATTNAGGAGTGTTTCAGTCTCCGTGAACCATG  | <u>TTN</u>       |
| p11-PMA5-R  | G TTCACGGAGACTGAACACTCCTNAAAT         |                  |
| p11-PMA6-F  | AATTATANAGGAGTGTTTCAGTCTCCGTGAACCATG  | <u>TAN</u>       |
| p11-PMA6-R  | G TTCACGGAGACTGAACACTCCTNTAT          |                  |
| p11-PMA7-F  | AATTATGNAGGAGTGTTTCAGTCTCCGTGAACCATG  | <u>TGN</u>       |
| p11-PMA7-R  | G TTCACGGAGACTGAACACTCCTNCAT          |                  |
| p11-PMA8-F  | AATTATCNAGGAGTGTTTCAGTCTCCGTGAACCATG  | <u>TCN</u>       |
| p11-PMA8-R  | G TTCACGGAGACTGAACACTCCTNGAT          |                  |
| p11-PMA9-F  | AATTATTNAGGAGTGTTTCAGTCTCCGTGAACCATG  | <u>ATN</u>       |
| p11-PMA9-R  | G TTCACGGAGACTGAACACTCCTNATT          |                  |
| p11-PMA10-F | AATTAGTNAGGAGTGTTTCAGTCTCCGTGAACCATG  | <u>GTN</u>       |
| p11-PMA10-R | G TTCACGGAGACTGAACACTCCTNACT          |                  |
| p11-PMA11-F | AATTACTNAGGAGTGTTTCAGTCTCCGTGAACCATG  | <u>CTN</u>       |
| p11-PMA11-R | G TTCACGGAGACTGAACACTCCTNAGT          |                  |
| p11-PMA12-F | ATTAAANAGGAGTGTTTCAGTCTCCGTGAACCATG   | <u>AAN</u>       |
| p11-PMA12-R | G TTCACGGAGACTGAACACTCCTNTTT          |                  |
| p11-PMA13-F | AATTAGGNAGGAGTGTTTCAGTCTCCGTGAACCATG  | <u>GGN</u>       |
| p11-PMA13-R | G TTCACGGAGACTGAACACTCCTNCCT          |                  |
| p11-PMA14-F | AATTACCNAGGAGTGTTTCAGTCTCCGTGAACCATG  | <u>CCN</u>       |
| p11-PMA14-R | G TTCACGGAGACTGAACACTCCTNNGT          |                  |
| p11-PMA15-F | AATTATTGAGGAGTGTTTCAGTCTCCGTGAACCATG  | <u>TTG</u>       |
| p11-PMA15-R | G TTCACGGAGACTGAACACTCCTCAAT          |                  |
| p11-PMA16-F | AATTATTCAGGAGTGTTTCAGTCTCCGTGAACCATG  | <u>TTC</u>       |
| p11-PMA16-R | G TTCACGGAGACTGAACACTCCTGAAT          |                  |

|             |                                       |            |
|-------------|---------------------------------------|------------|
| p11-PMA17-F | AATTATTAAGGAGTG TTCAGTCTCCGTGAAC CATG | <u>TTA</u> |
| p11-PMA17-R | G TTCACGGAGACTGAACACTCCTCTAAT         |            |
| p11-PMA18-F | AATTATTTAGGAGTG TTCAGTCTCCGTGAAC CATG | <u>TTT</u> |
| p11-PMA18-R | G TTCACGGAGACTGAACACTCCTAAAT          |            |

**Table S4. Protospacer sequences used for mammalian genome editing.** Mammalian genome targeting protospacers were designed based on type V-A CRISPR-Cas12a or type II CRISPR-SpCas9 loci with their requisite PAMs.

| Target species      | Gene  | Proto-spacer ID         | Protospacer sequence (5' to 3') | Cell line tested |
|---------------------|-------|-------------------------|---------------------------------|------------------|
| <i>Homo sapiens</i> | AAVS1 | 1                       | TTTGTGAGAATGGTGCGTCCTAGGTGT     | 293FT            |
|                     |       | 2                       | TTTGTGAGAATGGTGCGTCCTAGGTG      | 293FT            |
|                     |       | 3                       | TTCACCAGGTCGTGGCCGCCTCTACT      | 293FT            |
|                     |       | 4                       | TCCGTGTGGAAAACCTCCCTTTGTGAGA    | 293FT            |
|                     |       | 5                       | TCCCTGTCCCCCTTCCTCGTCCACCAT     | 293FT            |
|                     |       | 6                       | CTCCCTTTGTGAGAATGGTGCGTCCT      | 293FT            |
|                     |       | 7                       | TTCCCTACAGGGGTTCCCTGGCTCTGCT    | 293FT            |
|                     | CD34  | 1                       | TTTCAACTCCAGAGACAACCTTGAAGC     | 293FT            |
|                     |       | 2                       | TTTCAACCACTAGCACTAGCCTTGCAA     | 293FT            |
|                     |       | 3                       | TCCAGAAACGACAGTCAAATTCACATC     | 293FT            |
|                     |       | 4                       | TCCAGTCACAGACCTCTGTAATCAGCA     | 293FT            |
|                     |       | 5                       | TCCAGAGACAACCTTGAAGCCTAGCCT     | 293FT            |
|                     |       | 6                       | TCCCCTAAACCCTATACATCATCTTC      | 293FT            |
|                     |       | 7                       | TCTACCTCTGTGATAACCTCAGTTTAT     | 293FT            |
|                     |       | 8                       | TCTGTCCAGTCACAGACCTCTGTAATC     | 293FT            |
|                     |       | 9                       | CTCCAGAGACAACCTTGAAGCCTAGC      | 293FT            |
|                     |       | 10                      | CTTGCAACATCTCCCACTAAACCCTA      | 293FT            |
|                     |       | 11                      | TTCTGTCCAGTCACAGACCTCTGTAAT     | 293FT            |
|                     | RNF2  | 1                       | TTGGGCACATTAATTCAGTGTGTAGA      | 293FT            |
|                     |       | 2                       | CTCGAAGTCTACACAGTGAATTAATG      | 293FT            |
|                     |       | 3                       | CTACAAAGGAGTGTTTACATCGTTTT      | 293FT            |
|                     |       | 4                       | CTGCATCATCACAGCCCTTAGAAGTG      | 293FT            |
|                     |       | 5                       | TTCGAGGTGAAACCACAATTTCTAAGC     | 293FT            |
|                     |       | 6                       | TCTACACAGTGAATTAATGTGCCCAAT     | 293FT            |
|                     |       | 7                       | TCTAAGGGCTGTGATGATGCAGTCTGC     | 293FT            |
|                     |       | 8                       | TCCAATAAAAAATTAAGTAGCTTTT       | 293FT            |
|                     |       | 9                       | TCCTTTGTAGTCATGGTGTTCTTCAAC     | 293FT            |
|                     | DNMT1 | 1                       | TTTCCTTCAGCTAAAATAAAGGAGGA      | 293FT            |
|                     |       | 2                       | TTTATTTCCCTTCAGCTAAAATAAAGG     | 293FT            |
|                     | CCR5  | 1                       | TTTGGCCTGAATAATTGCAGTAGCTCT     | 293FT            |
|                     | EMX1  | 1                       | CCAATGACTAGGGTGGGCAACCAAAA      | 293FT            |
|                     | DNMT1 | 1                       | CCCTTCAGCTAAAATAAAGGAGG         | 293FT            |
|                     |       | 2                       | TTTCCCTTCAGCTAAAATAAAGG         | 293FT            |
| CCR5                | 1     | CCTGAATAATTGCAGTAGCTCTA | 293FT                           |                  |

|                     |               |   |                             |       |
|---------------------|---------------|---|-----------------------------|-------|
|                     | <i>EMX1</i>   | 1 | GTCACCTCCAATGACTAGGGTGG     | 293FT |
| <i>Mus musculus</i> | <i>MeCP2</i>  | 1 | TTTGCTGCCTCTGCTGGCTCTGCAGA  | ESC   |
|                     |               | 2 | TTTCGTGTCCAACCTTCAGGCAAGGTG | ESC   |
|                     | <i>Nrl</i>    | 1 | TTTCCTCCCAGTCCCTTGGCTATGGA  | ESC   |
|                     |               | 2 | TTGGGCTCCACACCATACAGCTCGGT  | ESC   |
|                     | <i>Rosa26</i> | 1 | TTGTCTCCTGAATACTAAGGTTAAAA  | ESC   |

**Table S5. crRNA scaffold optimization and screening.** Sequences of crRNA scaffolds within the loop were optimized, and the rest sequences remained the same as crRNA scaffold 1. Totally, 256 crRNA scaffolds (including scaffold 1, 2, 6 and 7) with all the possible 4-nt loop sequences thoroughly covered were generated. Meanwhile, 10 crRNA scaffolds with the 3-nt loop sequence mutated, 25 crRNA scaffolds with the 4-nt loop sequence mutated and 25 crRNA scaffolds (including scaffold 5) with the 5-nt loop sequence mutated targeting the *MeCP2* gene site were generated for screening. Spacer sequences targeting mouse endogenous genes are in blue or green font.

| crRNA scaffold ID          | crRNA sequences containing spacer (5' to 3')                                                          |
|----------------------------|-------------------------------------------------------------------------------------------------------|
| crRNA4n- <i>Nrl</i> Pool   | TGCAATTTCTACNNNNGTAGATGTGTCCAACCTTCAGGCAAGGTG<br>GTG<br>TGTTCACCTTGCCTGAAGGTTGGACACATCTACNNNNGTAGAAAT |
| crRNA4n- <i>MeCP2</i> Pool | TGCAATTTCTACNNNNGTAGATCCTGCCTCTGCTGGCTCTGCAGA<br>AGA<br>TGTTCCTGCAGAGCCAGCAGAGGCAGGATCTACNNNNGTAGAAAT |
| crRNA1- <i>MeCP2</i>       | ATTTCTACTATTGTAGATCCTGCCTCTGCTGGCTCTGCAGAG                                                            |
| crRNA2- <i>MeCP2</i>       | ATTTCTACTGTTGTAGATCCTGCCTCTGCTGGCTCTGCAGAG                                                            |
| crRNA5- <i>MeCP2</i>       | ATTTCTACTAGTTGTAGATCCTGCCTCTGCTGGCTCTGCAGAG                                                           |
| crRNA6- <i>MeCP2</i>       | ATTTCTACTACTGTAGATCCTGCCTCTGCTGGCTCTGCAGAG                                                            |
| crRNA7- <i>MeCP2</i>       | ATTTCTACTTTGGTAGATCCTGCCTCTGCTGGCTCTGCAGAG                                                            |
| crRNA1- <i>Nrl</i>         | ATTTCTACTATTGTAGATGTGTCCAACCTTCAGGCAAGGTTG                                                            |
| crRNA4n1- <i>Nrl</i>       | ATTTCTACTGTACGTAGATGTGTCCAACCTTCAGGCAAGGTTG                                                           |
| crRNA4n2- <i>Nrl</i>       | ATTTCTACACGAGTAGATGTGTCCAACCTTCAGGCAAGGTTG                                                            |
| crRNA4n3- <i>Nrl</i>       | ATTTCTACGATAGTAGATGTGTCCAACCTTCAGGCAAGGTTG                                                            |
| crRNA4n4- <i>Nrl</i>       | ATTTCTACTGAAGTAGATGTGTCCAACCTTCAGGCAAGGTTG                                                            |
| crRNA4n5- <i>Nrl</i>       | ATTTCTACTGATGTAGATGTGTCCAACCTTCAGGCAAGGTTG                                                            |
| crRNA4n6- <i>Nrl</i>       | ATTTCTACTAGCGTAGATGTGTCCAACCTTCAGGCAAGGTTG                                                            |
| crRNA4n7- <i>Nrl</i>       | ATTTCTACCGTTGTAGATGTGTCCAACCTTCAGGCAAGGTTG                                                            |
| crRNA4n8- <i>Nrl</i>       | ATTTCTACAGAAGTAGATGTGTCCAACCTTCAGGCAAGGTTG                                                            |
| crRNA4n9- <i>Nrl</i>       | ATTTCTACTGTCTGTAGATGTGTCCAACCTTCAGGCAAGGTTG                                                           |
| crRNA4n10- <i>Nrl</i>      | ATTTCTACCGGAGTAGATGTGTCCAACCTTCAGGCAAGGTTG                                                            |
| crRNA4n11- <i>Nrl</i>      | ATTTCTACGCTCGTAGATGTGTCCAACCTTCAGGCAAGGTTG                                                            |
| crRNA4n12- <i>Nrl</i>      | ATTTCTACTGTTGTAGATGTGTCCAACCTTCAGGCAAGGTTG                                                            |
| crRNA4n13- <i>Nrl</i>      | ATTTCTACCGGTGTAGATGTGTCCAACCTTCAGGCAAGGTTG                                                            |
| crRNA4n14- <i>Nrl</i>      | ATTTCTACGAGTGTAGATGTGTCCAACCTTCAGGCAAGGTTG                                                            |

|               |                                           |
|---------------|-------------------------------------------|
| crRNA4n15-Nrl | ATTTCTACGACAGTAGATGTGTCCAACCTTCAGGCAAGGTG |
| crRNA4n16-Nrl | ATTTCTACCCACGTAGATGTGTCCAACCTTCAGGCAAGGTG |
| crRNA4n17-Nrl | ATTTCTACGACTGTAGATGTGTCCAACCTTCAGGCAAGGTG |
| crRNA4n18-Nrl | ATTTCTACCACAGTAGATGTGTCCAACCTTCAGGCAAGGTG |
| crRNA4n19-Nrl | ATTTCTACCCGCGTAGATGTGTCCAACCTTCAGGCAAGGTG |
| crRNA4n20-Nrl | ATTTCTACGTATGTAGATGTGTCCAACCTTCAGGCAAGGTG |
| crRNA4n21-Nrl | ATTTCTACTCATGTAGATGTGTCCAACCTTCAGGCAAGGTG |
| crRNA4n22-Nrl | ATTTCTACTTCCGTAGATGTGTCCAACCTTCAGGCAAGGTG |
| crRNA4n23-Nrl | ATTTCTACGTCCGTAGATGTGTCCAACCTTCAGGCAAGGTG |
| crRNA4n24-Nrl | ATTTCTACCGATGTAGATGTGTCCAACCTTCAGGCAAGGTG |
| crRNA4n25-Nrl | ATTTCTACGGTAGTAGATGTGTCCAACCTTCAGGCAAGGTG |
| crRNA4n26-Nrl | ATTTCTACCACTGTAGATGTGTCCAACCTTCAGGCAAGGTG |
| crRNA4n27-Nrl | ATTTCTACAAAAGTAGATGTGTCCAACCTTCAGGCAAGGTG |
| crRNA4n28-Nrl | ATTTCTACGCGGGTAGATGTGTCCAACCTTCAGGCAAGGTG |
| crRNA4n29-Nrl | ATTTCTACACCAGTAGATGTGTCCAACCTTCAGGCAAGGTG |
| crRNA4n30-Nrl | ATTTCTACCTGAGTAGATGTGTCCAACCTTCAGGCAAGGTG |
| crRNA4n31-Nrl | ATTTCTACGTGTGTAGATGTGTCCAACCTTCAGGCAAGGTG |
| crRNA4n32-Nrl | ATTTCTACCTTTGTAGATGTGTCCAACCTTCAGGCAAGGTG |
| crRNA4n33-Nrl | ATTTCTACAATTGTAGATGTGTCCAACCTTCAGGCAAGGTG |
| crRNA4n34-Nrl | ATTTCTACCACGGTAGATGTGTCCAACCTTCAGGCAAGGTG |
| crRNA4n35-Nrl | ATTTCTACGCTTGTAGATGTGTCCAACCTTCAGGCAAGGTG |
| crRNA4n36-Nrl | ATTTCTACGGATGTAGATGTGTCCAACCTTCAGGCAAGGTG |
| crRNA4n37-Nrl | ATTTCTACATTGGTAGATGTGTCCAACCTTCAGGCAAGGTG |
| crRNA4n38-Nrl | ATTTCTACAGGCGTAGATGTGTCCAACCTTCAGGCAAGGTG |
| crRNA4n39-Nrl | ATTTCTACGGAAGTAGATGTGTCCAACCTTCAGGCAAGGTG |
| crRNA4n40-Nrl | ATTTCTACTGTAGTAGATGTGTCCAACCTTCAGGCAAGGTG |
| crRNA4n41-Nrl | ATTTCTACCAGCGTAAATGTGTCCAACCTTCAGGCAAGGTG |
| crRNA4n42-Nrl | ATTTCTACCGCAGTAGATGTGTCCAACCTTCAGGCAAGGTG |
| crRNA4n43-Nrl | ATTTCTACTACTGTAGATGTGTCCAACCTTCAGGCAAGGTG |
| crRNA4n44-Nrl | ATTTCTACACCTGTAGATGTGTCCAACCTTCAGGCAAGGTG |
| crRNA4n45-Nrl | ATTTCTACACGTGTAGATGTGTCCAACCTTCAGGCAAGGTG |
| crRNA4n46-Nrl | ATTTCTACCCGTGTAGATGTGTCCAACCTTCAGGCAAGGTG |
| crRNA4n47-Nrl | ATTTCTACTAACGTAGATGTGTCCAACCTTCAGGCAAGGTG |
| crRNA4n48-Nrl | ATTTCTACCTAAGTAGATGTGTCCAACCTTCAGGCAAGGTG |
| crRNA4n49-Nrl | ATTTCTACGGAGGTAGATGTGTCCAACCTTCAGGCAAGGTG |
| crRNA4n50-Nrl | ATTTCTACCGGGGTAGATGTGTCCAACCTTCAGGCAAGGTG |
| crRNA4n51-Nrl | ATTTCTACTCTTGTAGATGTGTCCAACCTTCAGGCAAGGTG |
| crRNA4n52-Nrl | ATTTCTACTGCAGTAGATGTGTCCAACCTTCAGGCAAGGTG |
| crRNA4n53-Nrl | ATTTCTACTTAAGTAGATGTGTCCAACCTTCAGGCAAGGTG |
| crRNA4n54-Nrl | ATTTCTACCATAGTAGATGTGTCCAACCTTCAGGCAAGGTG |
| crRNA4n55-Nrl | ATTTCTACGTGGGTAGATGTGTCCAACCTTCAGGCAAGGTG |
| crRNA4n56-Nrl | ATTTCTACAGGAGTAGATGTGTCCAACCTTCAGGCAAGGTG |

|               |                                           |
|---------------|-------------------------------------------|
| crRNA4n57-Nrl | ATTTCTACCCTCGTAGATGTGTCCAACCTTCAGGCAAGGTG |
| crRNA4n58-Nrl | ATTTCTACGTCAGTAGATGTGTCCAACCTTCAGGCAAGGTG |
| crRNA4n59-Nrl | ATTTCTACACCGGTAGATGTGTCCAACCTTCAGGCAAGGTG |
| crRNA4n60-Nrl | ATTTCTACAACGGTAGATGTGTCCAACCTTCAGGCAAGGTG |
| crRNA4n61-Nrl | ATTTCTACTTGTGTAGATGTGTCCAACCTTCAGGCAAGGTG |
| crRNA4n62-Nrl | ATTTCTACTAGTGTAGATGTGTCCAACCTTCAGGCAAGGTG |
| crRNA4n63-Nrl | ATTTCTACGGTGGTAGATGTGTCCAACCTTCAGGCAAGGTG |
| crRNA4n64-Nrl | ATTTCTACTCGGGTAGATGTGTCCAACCTTCAGGCAAGGTG |
| crRNA4n65-Nrl | ATTTCTACCTTGGTAGATGTGTCCAACCTTCAGGCAAGGTG |
| crRNA4n66-Nrl | ATTTCTACATTCGTAGATGTGTCCAACCTTCAGGCAAGGTG |
| crRNA4n67-Nrl | ATTTCTACTGCGGTAGATGTGTCCAACCTTCAGGCAAGGTG |
| crRNA4n68-Nrl | ATTTCTACCCTGTAGATGTGTCCAACCTTCAGGCAAGGTG  |
| crRNA4n69-Nrl | ATTTCTACTTTCGTAGATGTGTCCAACCTTCAGGCAAGGTG |
| crRNA4n70-Nrl | ATTTCTACAAATGTAGATGTGTCCAACCTTCAGGCAAGGTG |
| crRNA4n71-Nrl | ATTTCTACTAGAGTAGATGTGTCCAACCTTCAGGCAAGGTG |
| crRNA4n72-Nrl | ATTTCTACACTAGTAGATGTGTCCAACCTTCAGGCAAGGTG |
| crRNA4n73-Nrl | ATTTCTACTTGCGTAGATGTGTCCAACCTTCAGGCAAGGTG |
| crRNA4n74-Nrl | ATTTCTACGTAGGTAGATGTGTCCAACCTTCAGGCAAGGTG |
| crRNA4n75-Nrl | ATTTCTACAGCGGTAGATGTGTCCAACCTTCAGGCAAGGTG |
| crRNA4n76-Nrl | ATTTCTACTTATGTAGATGTGTCCAACCTTCAGGCAAGGTG |
| crRNA4n77-Nrl | ATTTCTACGGGCGTAGATGTGTCCAACCTTCAGGCAAGGTG |
| crRNA4n78-Nrl | ATTTCTACTAATGTAGATGTGTCCAACCTTCAGGCAAGGTG |
| crRNA4n79-Nrl | ATTTCTACTCCAGTAGATGTGTCCAACCTTCAGGCAAGGTG |
| crRNA4n80-Nrl | ATTTCTACTTTTGTAGATGTGTCCAACCTTCAGGCAAGGTG |
| crRNA4n81-Nrl | ATTTCTACCATGGTAGATGTGTCCAACCTTCAGGCAAGGTG |
| crRNA4n82-Nrl | ATTTCTACGCCTGTAGATGTGTCCAACCTTCAGGCAAGGTG |
| crRNA4n83-Nrl | ATTTCTACAATAGTAGATGTGTCCAACCTTCAGGCAAGGTG |
| crRNA4n84-Nrl | ATTTCTACGAGCGTAGATGTGTCCAACCTTCAGGCAAGGTG |
| crRNA4n85-Nrl | ATTTCTACTATCGTAGATGTGTCCAACCTTCAGGCAAGGTG |
| crRNA4n86-Nrl | ATTTCTACTTACGTAGATGTGTCCAACCTTCAGGCAAGGTG |
| crRNA4n87-Nrl | ATTTCTACCTATGTAGATGTGTCCAACCTTCAGGCAAGGTG |
| crRNA4n88-Nrl | ATTTCTACAGAGGTAGATGTGTCCAACCTTCAGGCAAGGTG |
| crRNA4n89-Nrl | ATTTCTACCTCTGTAGATGTGTCCAACCTTCAGGCAAGGTG |
| crRNA4n90-Nrl | ATTTCTACGTTAGTAGATGTGTCCAACCTTCAGGCAAGGTG |
| crRNA4n91-Nrl | ATTTCTACTGTGGTAGATGTGTCCAACCTTCAGGCAAGGTG |
| crRNA4n92-Nrl | ATTTCTACCCTAGTAGATGTGTCCAACCTTCAGGCAAGGTG |
| crRNA4n93-Nrl | ATTTCTACGCCGGTAGATGTGTCCAACCTTCAGGCAAGGTG |
| crRNA4n94-Nrl | ATTTCTACACAAGTAGATGTGTCCAACCTTCAGGCAAGGTG |
| crRNA4n95-Nrl | ATTTCTACGAAGGTAGATGTGTCCAACCTTCAGGCAAGGTG |
| crRNA4n96-Nrl | ATTTCTACTATGGTAGATGTGTCCAACCTTCAGGCAAGGTG |
| crRNA4n97-Nrl | ATTTCTACAATGGTAGATGTGTCCAACCTTCAGGCAAGGTG |
| crRNA4n98-Nrl | ATTTCTACGACCGTAGATGTGTCCAACCTTCAGGCAAGGTG |



|                        |                                            |
|------------------------|--------------------------------------------|
| crRNA4n99- <i>Nrl</i>  | ATTTCTACATTAGTAGATGTGTCCAACCTTCAGGCAAGGTG  |
| crRNA4n100- <i>Nrl</i> | ATTTCTACAATCGTAGATGTGTCCAACCTTCAGGCAAGGTG  |
| crRNA4n101- <i>Nrl</i> | ATTTCTACTTTGGTAGATGTGTCCAACCTTCAGGCAAGGTG  |
| crRNA4n102- <i>Nrl</i> | ATTTCTACTACAGTAGATGTGTCCAACCTTCAGGCAAGGTG  |
| crRNA4n103- <i>Nrl</i> | ATTTCTACGCAGGTAGATGTGTCCAACCTTCAGGCAAGGTG  |
| crRNA4n104- <i>Nrl</i> | ATTTCTACGTTTGTAGATGTGTCCAACCTTCAGGCAAGGTG  |
| crRNA4n105- <i>Nrl</i> | ATTTCTACTGACGTAGATGTGTCCAACCTTCAGGCAAGGTG  |
| crRNA4n106- <i>Nrl</i> | ATTTCTACGATGGTAGATGTGTCCAACCTTCAGGCAAGGTG  |
| crRNA4n107- <i>Nrl</i> | ATTTCTACTGCTGTAGATGTGTCCAACCTTCAGGCAAGGTG  |
| crRNA4n108- <i>Nrl</i> | ATTTCTACCCCGGTAGATGTGTCCAACCTTCAGGCAAGGTG  |
| crRNA4n109- <i>Nrl</i> | ATTTCTACGTAAGTAGATGTGTCCAACCTTCAGGCAAGGTG  |
| crRNA4n110- <i>Nrl</i> | ATTTCTACCCCCGTAGATGTGTCCAACCTTCAGGCAAGGTG  |
| crRNA4n111- <i>Nrl</i> | ATTTCTACCGCTGTAGATGTGTCCAACCTTCAGGCAAGGTG  |
| crRNA4n112- <i>Nrl</i> | ATTTCTACCCGAGTAGATGTGTCCAACCTTCAGGCAAGGTG  |
| crRNA4n113- <i>Nrl</i> | ATTTCTACCTGTGTAGATGTGTCCAACCTTCAGGCAAGGTG  |
| crRNA4n114- <i>Nrl</i> | ATTTCTACGGGTGTAGATGTGTCCAACCTTCAGGCAAGGTG  |
| crRNA4n115- <i>Nrl</i> | ATTTCTACGATCGTAGATGTGTCCAACCTTCAGGCAAGGTG  |
| crRNA4n116- <i>Nrl</i> | ATTTCTACCTTAGTAGATGTGTCCAACCTTCAGGCAAGGTG  |
| crRNA4n117- <i>Nrl</i> | ATTTCTACACATGTAGATGTGTCCAACCTTCAGGCAAGGTG  |
| crRNA4n118- <i>Nrl</i> | ATTTCTACAAGAGTAGATGTGTCCAACCTTCAGGCAAGGTG  |
| crRNA4n119- <i>Nrl</i> | ATTTCTACTAAAGTAGATGTGTCCAACCTTCAGGCAAGGTG  |
| crRNA4n120- <i>Nrl</i> | ATTTCTACCCAAGTAGATGTGTCCAACCTTCAGGCAAGGTG  |
| crRNA4n121- <i>Nrl</i> | ATTTCTACAGCTGTAGATGTGTCCAACCTTCAGGCAAGGTG  |
| crRNA4n122- <i>Nrl</i> | ATTTCTACGCGAGTAGATGTGTCCAACCTTCAGGCAAGGTG  |
| crRNA4n123- <i>Nrl</i> | ATTTCTACTGGGGTAGATGTGTCCAACCTTCAGGCAAGGTG  |
| crRNA4n124- <i>Nrl</i> | ATTTCTACCCTTGTAGATGTGTCCAACCTTCAGGCAAGGTG  |
| crRNA4n125- <i>Nrl</i> | ATTTCTACACGGGTAGATGTGTCCAACCTTCAGGCAAGGTG  |
| crRNA4n126- <i>Nrl</i> | ATTTCTACTCACGTAGATGTGTCCAACCTTCAGGCAAGGTG  |
| crRNA4n127- <i>Nrl</i> | ATTTCTACACCCGTAGATGTGTCCAACCTTCAGGCAAGGTG  |
| crRNA4n128- <i>Nrl</i> | ATTTCTACGCAAGTAGATGTGTCCAACCTTCAGGCAAGGTG  |
| crRNA4n129- <i>Nrl</i> | ATTTCTACCAGTGTAGATGTGTCCAACCTTCAGGCAAGGTG  |
| crRNA4n130- <i>Nrl</i> | ATTTCTACTTCTGTAGATGTGTCCAACCTTCAGGCAAGGTG  |
| crRNA4n131- <i>Nrl</i> | ATTTCTACGTTTCGTAGATGTGTCCAACCTTCAGGCAAGGTG |
| crRNA4n132- <i>Nrl</i> | ATTTCTACAGACGTAGATGTGTCCAACCTTCAGGCAAGGTG  |
| crRNA4n133- <i>Nrl</i> | ATTTCTACGAACGTAGATGTGTCCAACCTTCAGGCAAGGTG  |
| crRNA4n134- <i>Nrl</i> | ATTTCTACATCCGTAGATGTGTCCAACCTTCAGGCAAGGTG  |
| crRNA4n135- <i>Nrl</i> | ATTTCTACGCTGGTAGATGTGTCCAACCTTCAGGCAAGGTG  |
| crRNA4n136- <i>Nrl</i> | ATTTCTACATGAGTAGATGTGTCCAACCTTCAGGCAAGGTG  |
| crRNA4n137- <i>Nrl</i> | ATTTCTACTTCGGTAGATGTGTCCAACCTTCAGGCAAGGTG  |
| crRNA4n138- <i>Nrl</i> | ATTTCTACGCGCGTAGATGTGTCCAACCTTCAGGCAAGGTG  |
| crRNA4n139- <i>Nrl</i> | ATTTCTACCGTTCGTAGATGTGTCCAACCTTCAGGCAAGGTG |
| crRNA4n140- <i>Nrl</i> | ATTTCTACCACCGTAGATGTGTCCAACCTTCAGGCAAGGTG  |

|                        |                                           |
|------------------------|-------------------------------------------|
| crRNA4n141- <i>Nrl</i> | ATTTCTACACTGGTAGATGTGTCCAACCTTCAGGCAAGGTG |
| crRNA4n142- <i>Nrl</i> | ATTTCTACTCTGGTAGATGTGTCCAACCTTCAGGCAAGGTG |
| crRNA4n143- <i>Nrl</i> | ATTTCTACTCCCGTAGATGTGTCCAACCTTCAGGCAAGGTG |
| crRNA4n144- <i>Nrl</i> | ATTTCTACAAGTGTAGATGTGTCCAACCTTCAGGCAAGGTG |
| crRNA4n145- <i>Nrl</i> | ATTTCTACTATAGTAGATGTGTCCAACCTTCAGGCAAGGTG |
| crRNA4n146- <i>Nrl</i> | ATTTCTACAGCAGTAGATGTGTCCAACCTTCAGGCAAGGTG |
| crRNA4n147- <i>Nrl</i> | ATTTCTACAGGTGTAGATGTGTCCAACCTTCAGGCAAGGTG |
| crRNA4n148- <i>Nrl</i> | ATTTCTACTAAGGTAGATGTGTCCAACCTTCAGGCAAGGTG |
| crRNA4n149- <i>Nrl</i> | ATTTCTACTCCTGTAGATGTGTCCAACCTTCAGGCAAGGTG |
| crRNA4n150- <i>Nrl</i> | ATTTCTACAACAGTAGATGTGTCCAACCTTCAGGCAAGGTG |
| crRNA4n151- <i>Nrl</i> | ATTTCTACAGCCGTAGATGTGTCCAACCTTCAGGCAAGGTG |
| crRNA4n152- <i>Nrl</i> | ATTTCTACCAATGTAGATGTGTCCAACCTTCAGGCAAGGTG |
| crRNA4n153- <i>Nrl</i> | ATTTCTACGTCTGTAGATGTGTCCAACCTTCAGGCAAGGTG |
| crRNA4n154- <i>Nrl</i> | ATTTCTACAAAGGTAGATGTGTCCAACCTTCAGGCAAGGTG |
| crRNA4n155- <i>Nrl</i> | ATTTCTACGCTAGTAGATGTGTCCAACCTTCAGGCAAGGTG |
| crRNA4n156- <i>Nrl</i> | ATTTCTACTTGAGTAGATGTGTCCAACCTTCAGGCAAGGTG |
| crRNA4n157- <i>Nrl</i> | ATTTCTACGCGTGTAGATGTGTCCAACCTTCAGGCAAGGTG |
| crRNA4n158- <i>Nrl</i> | ATTTCTACACACGTAGATGTGTCCAACCTTCAGGCAAGGTG |
| crRNA4n159- <i>Nrl</i> | ATTTCTACTCGTGTAGATGTGTCCAACCTTCAGGCAAGGTG |
| crRNA4n160- <i>Nrl</i> | ATTTCTACACTTGTAGATGTGTCCAACCTTCAGGCAAGGTG |
| crRNA4n161- <i>Nrl</i> | ATTTCTACCATTGTAGATGTGTCCAACCTTCAGGCAAGGTG |
| crRNA4n162- <i>Nrl</i> | ATTTCTACACTCGTAGATGTGTCCAACCTTCAGGCAAGGTG |
| crRNA4n163- <i>Nrl</i> | ATTTCTACTTCAGTAGATGTGTCCAACCTTCAGGCAAGGTG |
| crRNA4n164- <i>Nrl</i> | ATTTCTACCTAGGTAGATGTGTCCAACCTTCAGGCAAGGTG |
| crRNA4n165- <i>Nrl</i> | ATTTCTACACGCGTAGATGTGTCCAACCTTCAGGCAAGGTG |
| crRNA4n166- <i>Nrl</i> | ATTTCTACCAGGTAGATGTGTCCAACCTTCAGGCAAGGTG  |
| crRNA4n167- <i>Nrl</i> | ATTTCTACGAGAGTAGATGTGTCCAACCTTCAGGCAAGGTG |
| crRNA4n168- <i>Nrl</i> | ATTTCTACCATCGTAGATGTGTCCAACCTTCAGGCAAGGTG |
| crRNA4n169- <i>Nrl</i> | ATTTCTACGTGCGTAGATGTGTCCAACCTTCAGGCAAGGTG |
| crRNA4n170- <i>Nrl</i> | ATTTCTACCATGTAGATGTGTCCAACCTTCAGGCAAGGTG  |
| crRNA4n171- <i>Nrl</i> | ATTTCTACATATGTAGATGTGTCCAACCTTCAGGCAAGGTG |
| crRNA4n172- <i>Nrl</i> | ATTTCTACTGGTGTAGATGTGTCCAACCTTCAGGCAAGGTG |
| crRNA4n173- <i>Nrl</i> | ATTTCTACTCAAGTAATGTGTCCAACCTTCAGGCAAGGTG  |
| crRNA4n174- <i>Nrl</i> | ATTTCTACGGTTGTAGATGTGTCCAACCTTCAGGCAAGGTG |
| crRNA4n175- <i>Nrl</i> | ATTTCTACTCTAGTAGATGTGTCCAACCTTCAGGCAAGGTG |
| crRNA4n176- <i>Nrl</i> | ATTTCTACGGCCGTAGATGTGTCCAACCTTCAGGCAAGGTG |
| crRNA4n177- <i>Nrl</i> | ATTTCTACTAGGGTAGATGTGTCCAACCTTCAGGCAAGGTG |
| crRNA4n178- <i>Nrl</i> | ATTTCTACTGAGGTAGATGTGTCCAACCTTCAGGCAAGGTG |
| crRNA4n179- <i>Nrl</i> | ATTTCTACATCAGTAGATGTGTCCAACCTTCAGGCAAGGTG |
| crRNA4n180- <i>Nrl</i> | ATTTCTACGCACGTAGATGTGTCCAACCTTCAGGCAAGGTG |
| crRNA4n181- <i>Nrl</i> | ATTTCTACCGTAGTAGATGTGTCCAACCTTCAGGCAAGGTG |
| crRNA4n182- <i>Nrl</i> | ATTTCTACATAGGTAGATGTGTCCAACCTTCAGGCAAGGTG |

|                        |                                                    |
|------------------------|----------------------------------------------------|
| crRNA4n183- <i>Nrl</i> | ATTTCTAC <b>CCT</b> GGTAGATGTGTCCAACCTTCAGGCAAGGTG |
| crRNA4n184- <i>Nrl</i> | ATTTCTAC <b>TCAG</b> GTAGATGTGTCCAACCTTCAGGCAAGGTG |
| crRNA4n185- <i>Nrl</i> | ATTTCTAC <b>CTCG</b> GTAGATGTGTCCAACCTTCAGGCAAGGTG |
| crRNA4n186- <i>Nrl</i> | ATTTCTAC <b>GCAT</b> GTAGATGTGTCCAACCTTCAGGCAAGGTG |
| crRNA4n187- <i>Nrl</i> | ATTTCTAC <b>AGTC</b> GTAGATGTGTCCAACCTTCAGGCAAGGTG |
| crRNA4n188- <i>Nrl</i> | ATTTCTAC <b>GACG</b> GTAGATGTGTCCAACCTTCAGGCAAGGTG |
| crRNA4n189- <i>Nrl</i> | ATTTCTAC <b>CGTG</b> GTAGATGTGTCCAACCTTCAGGCAAGGTG |
| crRNA4n190- <i>Nrl</i> | ATTTCTAC <b>CTTC</b> GTAGATGTGTCCAACCTTCAGGCAAGGTG |
| crRNA4n191- <i>Nrl</i> | ATTTCTAC <b>AACT</b> GTAGATGTGTCCAACCTTCAGGCAAGGTG |
| crRNA4n192- <i>Nrl</i> | ATTTCTAC <b>GTTG</b> GTAGATGTGTCCAACCTTCAGGCAAGGTG |
| crRNA4n193- <i>Nrl</i> | ATTTCTAC <b>AGTG</b> GTAGATGTGTCCAACCTTCAGGCAAGGTG |
| crRNA4n194- <i>Nrl</i> | ATTTCTAC <b>AAGC</b> GTAGATGTGTCCAACCTTCAGGCAAGGTG |
| crRNA4n195- <i>Nrl</i> | ATTTCTAC <b>ATTT</b> GTAGATGTGTCCAACCTTCAGGCAAGGTG |
| crRNA4n196- <i>Nrl</i> | ATTTCTAC <b>CCCAG</b> TAGATGTGTCCAACCTTCAGGCAAGGTG |
| crRNA4n197- <i>Nrl</i> | ATTTCTAC <b>GGGAG</b> TAGATGTGTCCAACCTTCAGGCAAGGTG |
| crRNA4n198- <i>Nrl</i> | ATTTCTAC <b>CGAAG</b> TAGATGTGTCCAACCTTCAGGCAAGGTG |
| crRNA4n199- <i>Nrl</i> | ATTTCTAC <b>GCCC</b> GTAGATGTGTCCAACCTTCAGGCAAGGTG |
| crRNA4n200- <i>Nrl</i> | ATTTCTAC <b>GAAT</b> GTAGATGTGTCCAACCTTCAGGCAAGGTG |
| crRNA4n201- <i>Nrl</i> | ATTTCTAC <b>AAAC</b> GTAGATGTGTCCAACCTTCAGGCAAGGTG |
| crRNA4n202- <i>Nrl</i> | ATTTCTAC <b>CTAC</b> GTAGATGTGTCCAACCTTCAGGCAAGGTG |
| crRNA4n203- <i>Nrl</i> | ATTTCTAC <b>CAAC</b> GTAGATGTGTCCAACCTTCAGGCAAGGTG |
| crRNA4n204- <i>Nrl</i> | ATTTCTAC <b>TGGAG</b> TAGATGTGTCCAACCTTCAGGCAAGGTG |
| crRNA4n205- <i>Nrl</i> | ATTTCTAC <b>ATGC</b> GTAGATGTGTCCAACCTTCAGGCAAGGTG |
| crRNA4n206- <i>Nrl</i> | ATTTCTAC <b>AACC</b> GTAGATGTGTCCAACCTTCAGGCAAGGTG |
| crRNA4n207- <i>Nrl</i> | ATTTCTAC <b>ATGT</b> GTAGATGTGTCCAACCTTCAGGCAAGGTG |
| crRNA4n208- <i>Nrl</i> | ATTTCTAC <b>ATGG</b> GTAGATGTGTCCAACCTTCAGGCAAGGTG |
| crRNA4n209- <i>Nrl</i> | ATTTCTAC <b>GTGAG</b> TAGATGTGTCCAACCTTCAGGCAAGGTG |
| crRNA4n210- <i>Nrl</i> | ATTTCTAC <b>ATAAG</b> TAGATGTGTCCAACCTTCAGGCAAGGTG |
| crRNA4n211- <i>Nrl</i> | ATTTCTAC <b>GGTC</b> GTAGATGTGTCCAACCTTCAGGCAAGGTG |
| crRNA4n212- <i>Nrl</i> | ATTTCTAC <b>GGGG</b> GTAGATGTGTCCAACCTTCAGGCAAGGTG |
| crRNA4n213- <i>Nrl</i> | ATTTCTAC <b>AGTAG</b> TAGATGTGTCCAACCTTCAGGCAAGGTG |
| crRNA4n214- <i>Nrl</i> | ATTTCTAC <b>ATCG</b> GTAGATGTGTCCAACCTTCAGGCAAGGTG |
| crRNA4n215- <i>Nrl</i> | ATTTCTAC <b>TACG</b> GTAGATGTGTCCAACCTTCAGGCAAGGTG |
| crRNA4n216- <i>Nrl</i> | ATTTCTAC <b>TGCC</b> GTAGATGTGTCCAACCTTCAGGCAAGGTG |
| crRNA4n217- <i>Nrl</i> | ATTTCTAC <b>CCGG</b> GTAGATGTGTCCAACCTTCAGGCAAGGTG |
| crRNA4n218- <i>Nrl</i> | ATTTCTAC <b>TACC</b> GTAGATGTGTCCAACCTTCAGGCAAGGTG |
| crRNA4n219- <i>Nrl</i> | ATTTCTAC <b>TTAG</b> TAGATGTGTCCAACCTTCAGGCAAGGTG  |
| crRNA4n220- <i>Nrl</i> | ATTTCTAC <b>CTGG</b> GTAGATGTGTCCAACCTTCAGGCAAGGTG |
| crRNA4n221- <i>Nrl</i> | ATTTCTAC <b>CAAG</b> GTAGATGTGTCCAACCTTCAGGCAAGGTG |
| crRNA4n222- <i>Nrl</i> | ATTTCTAC <b>CAGAG</b> TAGATGTGTCCAACCTTCAGGCAAGGTG |
| crRNA4n223- <i>Nrl</i> | ATTTCTAC <b>TCGAG</b> TAGATGTGTCCAACCTTCAGGCAAGGTG |
| crRNA4n224- <i>Nrl</i> | ATTTCTAC <b>ATAC</b> GTAGATGTGTCCAACCTTCAGGCAAGGTG |

|                          |                                           |
|--------------------------|-------------------------------------------|
| crRNA4n225- <i>Nrl</i>   | ATTTCTACCGACGTAGATGTGTCCAACCTTCAGGCAAGGTG |
| crRNA4n226- <i>Nrl</i>   | ATTTCTACGGACGTAGATGTGTCCAACCTTCAGGCAAGGTG |
| crRNA4n227- <i>Nrl</i>   | ATTTCTACCAAAGTAGATGTGTCCAACCTTCAGGCAAGGTG |
| crRNA4n228- <i>Nrl</i>   | ATTTCTACGAAAGTAGATGTGTCCAACCTTCAGGCAAGGTG |
| crRNA4n229- <i>Nrl</i>   | ATTTCTACACAGGTAGATGTGTCCAACCTTCAGGCAAGGTG |
| crRNA4n230- <i>Nrl</i>   | ATTTCTACCGAGGTAGATGTGTCCAACCTTCAGGCAAGGTG |
| crRNA4n231- <i>Nrl</i>   | ATTTCTACAGATGTAGATGTGTCCAACCTTCAGGCAAGGTG |
| crRNA4n232- <i>Nrl</i>   | ATTTCTACTCTCGTAGATGTGTCCAACCTTCAGGCAAGGTG |
| crRNA4n233- <i>Nrl</i>   | ATTTCTACGATTGTAGATGTGTCCAACCTTCAGGCAAGGTG |
| crRNA4n234- <i>Nrl</i>   | ATTTCTACAGTTGTAGATGTGTCCAACCTTCAGGCAAGGTG |
| crRNA4n235- <i>Nrl</i>   | ATTTCTACTCCGTAGATGTGTCCAACCTTCAGGCAAGGTG  |
| crRNA4n236- <i>Nrl</i>   | ATTTCTACCGCCGTAGATGTGTCCAACCTTCAGGCAAGGTG |
| crRNA4n237- <i>Nrl</i>   | ATTTCTACCTCAGTAGATGTGTCCAACCTTCAGGCAAGGTG |
| crRNA4n238- <i>Nrl</i>   | ATTTCTACGCCAGTAGATGTGTCCAACCTTCAGGCAAGGTG |
| crRNA4n239- <i>Nrl</i>   | ATTTCTACGGCAGTAGATGTGTCCAACCTTCAGGCAAGGTG |
| crRNA4n240- <i>Nrl</i>   | ATTTCTACGTCGGTAGATGTGTCCAACCTTCAGGCAAGGTG |
| crRNA4n241- <i>Nrl</i>   | ATTTCTACTCCGGTAGATGTGTCCAACCTTCAGGCAAGGTG |
| crRNA4n242- <i>Nrl</i>   | ATTTCTACCGCGGTAGATGTGTCCAACCTTCAGGCAAGGTG |
| crRNA4n243- <i>Nrl</i>   | ATTTCTACGGCGGTAGATGTGTCCAACCTTCAGGCAAGGTG |
| crRNA4n244- <i>Nrl</i>   | ATTTCTACATCTGTAGATGTGTCCAACCTTCAGGCAAGGTG |
| crRNA4n245- <i>Nrl</i>   | ATTTCTACGGCTGTAGATGTGTCCAACCTTCAGGCAAGGTG |
| crRNA4n246- <i>Nrl</i>   | ATTTCTACTTAGGTAGATGTGTCCAACCTTCAGGCAAGGTG |
| crRNA4n247- <i>Nrl</i>   | ATTTCTACCTGCGTAGATGTGTCCAACCTTCAGGCAAGGTG |
| crRNA4n248- <i>Nrl</i>   | ATTTCTACTCGCGTAGATGTGTCCAACCTTCAGGCAAGGTG |
| crRNA4n249- <i>Nrl</i>   | ATTTCTACCGGCGTAGATGTGTCCAACCTTCAGGCAAGGTG |
| crRNA4n250- <i>Nrl</i>   | ATTTCTACTGGCGTAGATGTGTCCAACCTTCAGGCAAGGTG |
| crRNA4n251- <i>Nrl</i>   | ATTTCTACAAGGGTAGATGTGTCCAACCTTCAGGCAAGGTG |
| crRNA4n252- <i>Nrl</i>   | ATTTCTACCAGGGTAGATGTGTCCAACCTTCAGGCAAGGTG |
| crRNA4n253- <i>Nrl</i>   | ATTTCTACGAGGGTAGATGTGTCCAACCTTCAGGCAAGGTG |
| crRNA4n254- <i>Nrl</i>   | ATTTCTACTTGGGTAGATGTGTCCAACCTTCAGGCAAGGTG |
| crRNA4n255- <i>Nrl</i>   | ATTTCTACAGGGGTAGATGTGTCCAACCTTCAGGCAAGGTG |
| crRNA4n178- <i>MeCP2</i> | ATTTCTACTGAGGTAGATCCTGCCTCTGCTGGCTCTGCAGA |
| crRNA4n213- <i>MeCP2</i> | ATTTCTACAGTAGTAGATCCTGCCTCTGCTGGCTCTGCAGA |
| crRNA4n234- <i>MeCP2</i> | ATTTCTACAGTTGTAGATCCTGCCTCTGCTGGCTCTGCAGA |
| crRNA4n100- <i>MeCP2</i> | ATTTCTACAATCGTAGATCCTGCCTCTGCTGGCTCTGCAGA |
| crRNA4n128- <i>MeCP2</i> | ATTTCTACGCAAGTAGATCCTGCCTCTGCTGGCTCTGCAGA |
| crRNA4n90- <i>MeCP2</i>  | ATTTCTACGTTAGTAGATCCTGCCTCTGCTGGCTCTGCAGA |
| crRNA4n86- <i>MeCP2</i>  | ATTTCTACTTACGTAGATCCTGCCTCTGCTGGCTCTGCAGA |
| crRNA4n103- <i>MeCP2</i> | ATTTCTACGCAGGTAGATCCTGCCTCTGCTGGCTCTGCAGA |
| crRNA4n130- <i>MeCP2</i> | ATTTCTACTTCTGTAGATCCTGCCTCTGCTGGCTCTGCAGA |
| crRNA4n250- <i>MeCP2</i> | ATTTCTACTGGCGTAGATCCTGCCTCTGCTGGCTCTGCAGA |
| crRNA4n216- <i>MeCP2</i> | ATTTCTACTGCCGTAGATCCTGCCTCTGCTGGCTCTGCAGA |

|                  |                                            |
|------------------|--------------------------------------------|
| crRNA4n10-MeCP2  | ATTTCTACCGGAGTAGATCCTGCCTCTGCTGGCTCTGCAGA  |
| crRNA4n110-MeCP2 | ATTTCTACCCCCGTAGATCCTGCCTCTGCTGGCTCTGCAGA  |
| crRNA4n141-MeCP2 | ATTTCTACACTGGTAGATCCTGCCTCTGCTGGCTCTGCAGA  |
| crRNA4n148-MeCP2 | ATTTCTACTAAGGTAGATCCTGCCTCTGCTGGCTCTGCAGA  |
| crRNA4n68-MeCP2  | ATTTCTACCCCTGTAGATCCTGCCTCTGCTGGCTCTGCAGA  |
| crRNA4n124-MeCP2 | ATTTCTACCCTTGTAGATCCTGCCTCTGCTGGCTCTGCAGA  |
| crRNA4n120-MeCP2 | ATTTCTACCCAAGTAGATCCTGCCTCTGCTGGCTCTGCAGA  |
| crRNA4n132-MeCP2 | ATTTCTACAGACGTAGATCCTGCCTCTGCTGGCTCTGCAGA  |
| crRNA4n156-MeCP2 | ATTTCTACTTAGTAGATCCTGCCTCTGCTGGCTCTGCAGA   |
| crRNA4n93-MeCP2  | ATTTCTACGCCGGTAGATCCTGCCTCTGCTGGCTCTGCAGA  |
| crRNA4n232-MeCP2 | ATTTCTACTCTCGTAGATCCTGCCTCTGCTGGCTCTGCAGA  |
| crRNA4n96-MeCP2  | ATTTCTACTATGGTAGATCCTGCCTCTGCTGGCTCTGCAGA  |
| crRNA4n89-MeCP2  | ATTTCTACCTCTGTAGATCCTGCCTCTGCTGGCTCTGCAGA  |
| crRNA4n80-MeCP2  | ATTTCTACFTTTGTAGATCCTGCCTCTGCTGGCTCTGCAGA  |
| crRNA3n1-MeCP2   | ATTTCTACACGGTAGATCCTGCCTCTGCTGGCTCTGCAGA   |
| crRNA3n2-MeCP2   | ATTTCTACAGCGTAGATCCTGCCTCTGCTGGCTCTGCAGA   |
| crRNA3n3-MeCP2   | ATTTCTACTGGGTAGATCCTGCCTCTGCTGGCTCTGCAGA   |
| crRNA3n4-MeCP2   | ATTTCTACCGTGTAGATCCTGCCTCTGCTGGCTCTGCAGA   |
| crRNA3n5-MeCP2   | ATTTCTACCATGTAGATCCTGCCTCTGCTGGCTCTGCAGA   |
| crRNA3n5-MeCP2   | ATTTCTACCTCGTAGATCCTGCCTCTGCTGGCTCTGCAGA   |
| crRNA3n7-MeCP2   | ATTTCTACCCTGTAGATCCTGCCTCTGCTGGCTCTGCAGA   |
| crRNA3n8-MeCP2   | ATTTCTACGTCGTAGATCCTGCCTCTGCTGGCTCTGCAGA   |
| crRNA3n9-MeCP2   | ATTTCTACGGCGTAGATCCTGCCTCTGCTGGCTCTGCAGA   |
| crRNA3n10-MeCP2  | ATTTCTACGTTGTAGATCCTGCCTCTGCTGGCTCTGCAGA   |
| crRNA5n1-MeCP2   | ATTTCTACAACCCGTAGATCCTGCCTCTGCTGGCTCTGCAGA |
| crRNA5n2-MeCP2   | ATTTCTACGCGGGGTAGATCCTGCCTCTGCTGGCTCTGCAGA |
| crRNA5n3-MeCP2   | ATTTCTACCTGACGTAGATCCTGCCTCTGCTGGCTCTGCAGA |
| crRNA5n4-MeCP2   | ATTTCTACAACCAGTAGATCCTGCCTCTGCTGGCTCTGCAGA |
| crRNA5n5-MeCP2   | ATTTCTACTATTTGTAGATCCTGCCTCTGCTGGCTCTGCAGA |
| crRNA5n6-MeCP2   | ATTTCTACACCCGTAGATCCTGCCTCTGCTGGCTCTGCAGA  |
| crRNA5n7-MeCP2   | ATTTCTACCGCATGTAGATCCTGCCTCTGCTGGCTCTGCAGA |
| crRNA5n8-MeCP2   | ATTTCTACGCTAGGTAGATCCTGCCTCTGCTGGCTCTGCAGA |
| crRNA5n9-MeCP2   | ATTTCTACGGTGTGTAGATCCTGCCTCTGCTGGCTCTGCAGA |
| crRNA5n10-MeCP2  | ATTTCTACTCATTGTAGATCCTGCCTCTGCTGGCTCTGCAGA |
| crRNA5n11-MeCP2  | ATTTCTACCCCCGTAGATCCTGCCTCTGCTGGCTCTGCAGA  |
| crRNA5n12-MeCP2  | ATTTCTACCGCCGGTAGATCCTGCCTCTGCTGGCTCTGCAGA |
| crRNA5n13-MeCP2  | ATTTCTACTGGTGGTAGATCCTGCCTCTGCTGGCTCTGCAGA |
| crRNA5n14-MeCP2  | ATTTCTACTGCGCGTAGATCCTGCCTCTGCTGGCTCTGCAGA |
| crRNA5n15-MeCP2  | ATTTCTACTCGCAGTAGATCCTGCCTCTGCTGGCTCTGCAGA |
| crRNA5n16-MeCP2  | ATTTCTACGAGATGTAGATCCTGCCTCTGCTGGCTCTGCAGA |
| crRNA5n17-MeCP2  | ATTTCTACACGTGGTAGATCCTGCCTCTGCTGGCTCTGCAGA |
| crRNA5n18-MeCP2  | ATTTCTACAATTAGTAGATCCTGCCTCTGCTGGCTCTGCAGA |

|                 |                                            |
|-----------------|--------------------------------------------|
| crRNA5n19-MeCP2 | ATTTCTACACCGGGTAGATCCTGCCTCTGCTGGCTCTGCAGA |
| crRNA5n20-MeCP2 | ATTTCTACTGCAAGTAGATCCTGCCTCTGCTGGCTCTGCAGA |
| crRNA5n21-MeCP2 | ATTTCTACTAATTGTAGATCCTGCCTCTGCTGGCTCTGCAGA |
| crRNA5n22-MeCP2 | ATTTCTACTAGTTGTAGATCCTGCCTCTGCTGGCTCTGCAGA |
| crRNA5n23-MeCP2 | ATTTCTACTTATTGTAGATCCTGCCTCTGCTGGCTCTGCAGA |
| crRNA5n24-MeCP2 | ATTTCTACTTTTTGTAGATCCTGCCTCTGCTGGCTCTGCAGA |
| crRNA5n25-MeCP2 | ATTTCTACTGTTTGTAGATCCTGCCTCTGCTGGCTCTGCAGA |

**Table S6. Primer sequences used for PCR amplification.**

| Primer Name          | Primer sequences (5'-3')                               | Length | Species             |
|----------------------|--------------------------------------------------------|--------|---------------------|
| p11-F<br>p11-R       | AGTGAGCGAGGAAGCGGAAGA<br>CAGGAGAGCGTTCACCGACAA         | 436 bp | p11-<br>LacY-wtx    |
| AAVS1-F<br>AAVS1-R   | TTATATTGTTCCCTCCGTGCGTCAGTT<br>CCCGAAGAGTGAGTTTGCCAAG  | 585 bp | <i>Homo sapiens</i> |
| CD34-F<br>CD34-R     | TTGAAATGAGTTTGGTCAGGGATGG<br>AACTGTGTATTTCCGTGCTGATTCC | 550 bp |                     |
| RNF2-F<br>RNF2-R     | GGAGCTGTAGGCGATTATAGTTGAA<br>TTCTCAAACCCTGGAAAGCACTTT  | 403 bp |                     |
| DNMT1-F<br>DNMT1-R   | CTCCTGCTCGGTGAATTTGG<br>TAGTTGATAAGCGAACCTCACAC        | 452 bp |                     |
| CCR5-F<br>CCR5-R     | GCAGCTCTCATTTTCCATACAGT<br>GATCGGGTGTAAACTGAGCTTG      | 493 bp |                     |
| EXM1-F<br>EMX1-R     | AGCCTCAGTCTTCCCATCAG<br>CCATTGCTTGTCCCTCTGTC           | 451 bp |                     |
| MeCP2-F<br>MeCP2-R   | GCACTCAAGCTCACCTATACTCACT<br>TACCCAGACCTAATCCACCACCAA  | 593 bp | <i>Mus musculus</i> |
| Nr1-F<br>Nr1-R       | GCCTCTCAGTGTCTACACCTTCC<br>CCATAGAGACAGGACCCTGGTTCT    | 386 bp |                     |
| Rosa26-F<br>Rosa26-R | TCCAAATTCTTCACAGCCAAAGTCA<br>GGAGCCTGCCAAGTAACTACTCTT  | 405 bp |                     |

**Table S7. Frequency of Cas12a- and SpCas9-mediated targeted indel mutations at on-target sites in human 293FT cells.** DNA sequences and indel frequency of ArCas12a, BsCas12a, HkCas12a, PrCas12a and SpCas9 target sites are shown. For Cas12a, crRNA scaffold 1 and 4n96 were used separately. Cas12a and SpCas9 PAMs are shown in red and blue, respectively. Indel frequency is assessed by T7EI assay with means and standard errors of the mean (s.e.m.) shown, n = 2.

| Target sites                        | ArCas12a |       | BsCas12a |        | HkCas12a |       | PrCas12a |        | SpCas9 |
|-------------------------------------|----------|-------|----------|--------|----------|-------|----------|--------|--------|
| Guide RNA                           | 4n96     | 1     | 4n96     | 1      | 4n96     | 1     | 4n96     | 1      | sgRNA  |
| CCTTTTA <b>TTTC</b> CCTTCAGCT       | 9.5 ±    | 6.2 ± | 10.5 ±   | 6.7 ±  | 10.5 ±   | 4.7 ± | 15.2 ±   | 12.2 ± | 25.5 ± |
| AAAATAAAGG <b>AGG</b> AGGAAGC       | 0.8      | 1.0   | 0.9      | 0.5    | 0.6      | 0.3   | 1.1      | 1.2    | 1.5    |
| GGAATTC <b>TTTGGC</b> TGAATA        | 8.3 ±    | 5.5 ± | 16.5 ±   | 9.8 ±  | 12.1 ±   | 6.6 ± | 10.2 ±   | 6.5 ±  | 20.2 ± |
| ATTGCAGTAGCTCTAACAGG                | 0.5      | 0.5   | 1.2      | 1.1    | 0.8      | 0.8   | 1.2      | 0.4    | 1.1    |
| CGATGTCACCTCCAATGACT                | 9.0 ±    | 5.4 ± | 15.8 ±   | 10.0 ± | 16.7 ±   | 9.8 ± | 17.8 ±   | 11.5 ± | 25.3 ± |
| AGGG <b>TGG</b> CAACC <b>CAA</b> CC | 1.1      | 0.7   | 1.3      | 0.9    | 1.2      | 1.1   | 0.7      | 0.9    | 1.4    |
| TTCCT <b>TTA</b> TTTCCCTTCAG        | 12.1 ±   | 8.5 ± | 14.2 ±   | 9.9 ±  | 13.2 ±   | 8.8 ± | 16.5 ±   | 10.6 ± | 20.0 ± |
| CTAAAATAA <b>AGG</b> AGGAGGAA       | 1.2      | 0.8   | 1.1      | 0.6    | 1.1      | 0.9   | 1.2      | 1.0    | 1.1    |



**Table S8. Off-target analysis by targeted deep sequencing in the human 293FT cells.** Target and off-target sequences of the human *DNMT1* site 1, and indel frequency of BsCas12a, PrCas12a and SpCas9 are shown. For Cas12a, crRNA scaffold 1 and 4n96 were used separately. Cas12a and SpCas9 PAMs are underlined. Indel frequency is assessed by targeted deep sequencing.

| Cas12a |                                                          | PrCas12a  |         | BsCas12a  |         | Cas9 |                                               | SpCas9  |
|--------|----------------------------------------------------------|-----------|---------|-----------|---------|------|-----------------------------------------------|---------|
| ID     | On/Off-target sequence                                   | crRNA4n96 | crRNA1  | crRNA4n96 | crRNA1  | ID   | On/Off-target sequence                        | sgRNA   |
| ON     | <u>TTCCCTTCAGCTAAA</u> AATAAA<br>GGAGGA                  | 12.62%    | 7.65%   | 9.90%     | 3.89%   | ON   | CCCTTCAGCTAAA <u>A</u> TAAA<br>GGAGG          | 21.76%  |
| OT1    | <u>TTG</u> CtTTCAGCTAAA <u>c</u> TAAA<br>aGAGGA          | 0         | 0       | 0         | 0.021%  | OT1  | CCCTgaAGCTAAA <u>A</u> TAAA<br>tGGGG          | 0.046%  |
| OT2    | <u>TTCCCTTCAGg</u> TAAAATtAg<br>GGAGGA                   | 0         | 0.0086% | 0         | 0       | OT2  | CCCTTCAGCTAAA <u>g</u> TcAA<br>aGGGG          | 0.032%  |
| OT3    | <u>TTA</u> tCTTCa <u>a</u> CTAAA <u>A</u> TAAA<br>GaAaGA | 0         | 0.0053% | 0.0033%   | 0       | OT3  | CCCTgCAGCTAg <u>A</u> AATAAA<br>GcAGG         | 0.049%  |
| OT4    | <u>TTCCCTc</u> CA <u>t</u> CTAAAATgAA<br>GGAaGA          | 0         | 0.038%  | 0         | 0.0029% | OT4  | gCCcTCAGCTAAA <u>A</u> TgAA<br>GGGGG          | 0       |
| OT5    | <u>TTG</u> CtTTCa <u>A</u> CcAAA <u>t</u> TAAA<br>GGAGGA | 0         | 0.013%  | 0.0075%   | 0.0071% | OT5  | CCCTTCAGgTAg <u>A</u> A <u>c</u> AAA<br>GGAGG | 0.0056% |
| OT6    | <u>TTGCCTc</u> CA <u>t</u> CTAAA <u>A</u> TcAA<br>GGAGaA | 0.020%    | 0       | 0.0074%   | 0       | OT6  | CCCTTCAGCTAAA <u>A</u> T <u>a</u> cA<br>GtGGG | 0.032%  |
| OT7    | <u>TTGCCTTCAGg</u> TAAA <u>A</u> TAAA<br>GagaGA          | 0.0086%   | 0.0066% | 0         | 0       | OT7  | gCCTTCAGtTAA <u>c</u> ATAAA<br>GGGGG          | 0.099%  |

|      |                                            |         |         |         |         |      |                                      |         |
|------|--------------------------------------------|---------|---------|---------|---------|------|--------------------------------------|---------|
| OT8  | <u>TTT</u> CCTTCAGCaAcAgTAAA<br>GGAGaA     | 0.016%  | 0.026%  | 0.021%  | 0.019%  | OT8  | CCCTTCAGCTAAAA <u>accgA</u><br>GGTGG | 0       |
| OT9  | <u>TTGCCa</u> TCAGCTAAAATcAA<br>GGtaGA     | 0.0064% | 0.0052% | 0.0074% | 0.015%  | OT9  | CCCTTCAGCTAAA <u>AgAtA</u><br>GGAGG  | 0.0028% |
| OT10 | <u>TTCag</u> TTCAGCTAcAATAAA<br>GaAGGA     | 0       | 0       | 0       | 0       | OT10 | CCCTTtAGCTgAAATAAA<br>GtTGG          | 0.012%  |
| OT11 | <u>TTCCCT</u> TTCAGCTAAAATAAt<br>GaAttA    | 0       | 0       | 0       | 0       | OT11 | CCCTTCAGCTAcAATAgA<br>aGGGG          | 0       |
| OT12 | <u>TTTCCCT</u> TTCAGtaAAgAaAAA<br>GGAGGA   | 0       | 0       | 0       | 0       | OT12 | CaCTTaAGCTAAAATcAA<br>GGTGG          | 0       |
| OT13 | <u>TTCaCT</u> TaAGCTAAAATcAA<br>GGtGGA     | 0.027%  | 0.011%  | 0.011%  | 0.034%  | OT13 | CCCTTCActTAAAAaAAA<br>GGAGG          | 0.014%  |
| OT14 | <u>TTCCCT</u> TTCaCTggAATAAA<br>GcAGGA     | 0       | 0.010%  | 0.0049% | 0       | OT14 | gCtTTCAGCTAAAATAAA<br>tGGGG          | 0.013%  |
| OT15 | <u>TTGCCT</u> TTCAGtaAAAATAAA<br>GGaAaGA   | 0.013%  | 0       | 0.0045% | 0       | OT15 | CCCTTCAGgTAAAATtAg<br>GGAGG          | 0.0058% |
| OT16 | <u>TTTCCCT</u> TTCatCaAAAAATAAA<br>GGaAaGg | 0       | 0       | 0       | 0       | -    | -                                    | -       |
| OT17 | <u>TTACCc</u> TcTcGCTAAAAaAAA<br>tGAGGA    | 0.0095% | 0.0086% | 0.011%  | 0.0086% | -    | -                                    | -       |
| OT18 | <u>TTGCCT</u> TTCtGCTAAAATgAA<br>GaAGGg    | 0       | 0.022%  | 0       | 0       | -    | -                                    | -       |
| OT19 | <u>TTAta</u> TgCAGCTAAAATAAA<br>tGAGGA     | 0       | 0       | 0       | 0       | -    | -                                    | -       |
| OT20 | <u>TTGCt</u> TTCaAaCaAAAATAAA<br>GGAGGA    | 0       | 0       | 0.0064% | 0       | -    | -                                    | -       |
