# Supplementary material for: Enhanced mammalian genome editing by new Cas12a orthologs with optimized crRNA scaffolds
Source: PubMed Central journal article supplement (PMC6362571; doi:10.1186/s13059-019-1620-8), 2019-02-05
Supplement: 13059_2019_1620_MOESM5_ESM.pdf [file 13059_2019_1620_MOESM5_ESM.pdf]

## Supplementary Sequences

### Humanized Cas12a coding sequence derived from *Arcobacter butzleri* L348 contig000039 (GeneBank ID: JAIQ0100039.1)

ATGTTTCAGCCTGGACTACTTCAGCCTGACCCTGAGCCAGCGCTACATCGACATCTACAACAC  
CATGATCGGCGGCAACACCCTGGCCGACGGCACCAAGGTGCAGGGCATCAACGAGAACATCA  
ACATCTACCGCCAGAAGAACAACATCGACCGCAAGAACCTGCCACCCTGAAGCCCCTGCAC  
AAGCAGCTGCTGAGCGACCGGAGACCCTGAGCTGGATCCCCGAGGCTTCAAGACCAAGGA  
GGAGGTGGTGGGCGCCATCGAGGACTTCTACAAGAACAACATCATCAGCTTCAAGTGCTGCG  
ACAACATCGTGGACATCACCAAGCAGTTCATCGACATCTTCAGCCTGAACGAGGACTACGAG  
CTGAACAAGATCTTCATCAAGAACGACATCAGCATCACCCAGCATCAGCCAGGACATCTTCAA  
GGACTACCGCATCATCAAGGAGGCCCTGTGGCAGAAGCACATCAACGAGAACCCCAAGGCCG  
CCAAGAGCAAGGACCTGACCGGCGACAAGGAGAAGTACTTCAGCCGCAAGAACAGCTTCTTC  
AGCTTCGAGGAGATCATCAGCAGCCTGAAGCTGATGGGCCGCAAGATCGACCTGTTTCAGCTA  
CTTCAAGGACAACGTGGAGTACCGCGCCACAGCATCGAGACCACCTTCATCAAGTGGCAGA  
AGAACAAGAACGACAAGAAGACCACCAAGGAGCTGCTGGACAACATCCTGAACCTGCAGCGC  
GTGCTGAAGCCCCTGTACCTGAAGCCGAGGTGGAGAAGGACATCCTGTTCTACAGCATCTT  
CGACATCTACTTCGAGAGCCTGAACGAGATCGTGAAGCTGTACAACAAGGTGCGCGACTTCG  
AGAGCAAGAAGCCCTACAGCCTGGAGAAGTTCAAGCTGAACTTCCAGAACAGCACCCCTGCTG  
AGCGGCTGGGACGTGAACAAGGAGCCCGACAACACCAGCATCCTGCTGAAGAAGGACGGCCT  
GTACTACCTGGGCATCATGGACAAGAAGCACACCAGCGTGTTCAGAACCCTGGAGAGCAGCA  
AGGGCGGCTACGAGAAGATCGAGTACAAGCTGCTGAGCGGCCCAACAAGATGCTGCCAAG  
GTGTTCTTCAGCAACAAGAGCATCGGCTACTACAACCCCGCCCCGCTGCTGGAGAAGTA  
CAAGAGCGGCGTGCACAAGAAGGGCGAGAGCTTCGACCTGAACTTCTGCCACGAGCTGATCG  
ACTTCTTCAAGGCCAGCATCGACAAGCACGAGGACTGGAAGAACTTCAACTTCAAGTTCAGC  
GACACCAGCGAGTACGCCGACATCAGCGGCTTCTACCGCGAGGTGGAGCAGCAGGGCTACAA  
GATCACCTTCAAGAACATCGACGAGGAGTTCATCAACACCCTGATCAACGAGGGCAAGCTGT  
ACCTGTTCCAGATCTACAACAAGGACTTCAGCACCTTCAGCAAGGGCACCAAGAACCTGCAC  
ACCCTGTACTGGGAGATGATCTTCAACGAGGAGAACCTGAAGAACGTGGTGTACAAGCTGAA  
CGGCGAGGCCGAGATCTTCTACCGCAAGAAGAGCATCGAGTACAGCGAGGACAAGATGAAGT  
ACGGCCACCCTACGAGGAGCTGAAGGACAAGTTCAACTACCCCATCATCAAGGACAAGCGC  
TTCacatggACAAGTTCAGTTCACGTGCCATCACCATGAACTTCAAGGCCACCGGCCG  
CAGCTACATCAACGAGGAGGTGAACGACTTCTGCGCCAGAACAGCAAGGACGTGAAGATCA  
TCGGCATCAACCGCGGCGAGCGCCACCTGATCTACCTGACCATGATCAACGCCAAGGGCGAG  
ATCATCCAGCAGTACAGCCTGAACGAGATCGTGAACAGCTACAACAACAAGAACTTCACCGT  
GAACTACAACGAGAAGCTGAGCAAGAAGGAGGGCGAGCGGCCATCGCCC GCGAGA ACTGGG  
GCGTGGTGGAGAACATCAAGGAGCTGAAGGAGGGCTACCTGAGCCACGCCATCCACACCATC  
AGCAACCTGATCGTGGAGAACAACGCCATCGTGGTGTGGAGGACCTGAACTTCGAGTTCAA  
GCGCGAGCGCCTGAAGGTGGAGAAGAGCATCTACCAGAAGTTCGAGAAGATGCTGATCGACA  
AGCTGAACTACCTGGTGGACAAGAAGAAGGACATCAACGAGAACGGCGGCCCTGCTGAAGGCC  
CTGCAGCTGACCAACAAGTTCGAGAGCTTCGAGAAGATCGGCAAGCAGAACGGCTTCTGTT  
CTTCGTGAACGCCTGGAACATCACCAAGATCTGCCCCGTGACCGGCTTCGTGAGCCTGTTTCG  
ACACCCGCTACCAGAGCGTGGACAAGGCCCGGAGTTCCTTCAGCAAGTTCGACAGCATCAAG  
TACAACGAGGAGAAGGAGCACTACGAGTTCGTGTTCTGACTACAGCAACTTCACCGACAAGGC

CAAGGACACCAAGACCAAGTGGACCGTGTGCAGCTACGGCACCCGCATCAAGACCTTCCGCA  
ACAGCGAGAAGAACAACAACACTGGGACAACAAGACCGTGAGCCCCACCGAGGACCTGAGCAAG  
CTGCTGAAGAGCTGCGACCGCGACATCAAGGAGTTCATCATCAGCCAGGACAAGAAGGAGTT  
CTTCGTGGAGCTGCTGGAGATCTTCAGCCTGATCGTGCAGATGAAGAACAGCATCATCAACA  
GCGAGATCGACTACATCATCAGCCCCGTGGCCAACGAGAACGGCGAGTTCCTCGACAGCCGC  
TTCGCCAACAGCAGCCTGCCCAAGAACGCCGACGCCAACGCCGCCTACAACACCCGCCGCAA  
GGCCTGATGCTGCTGGAGAAGATCCGCGACAGCGAGATCGGCAAGAAGATCGACATGAAGA  
TCACCAACACCGAGTGGCTGAACTTCGTGCAGGAGCGC

### **AbCas12a protein sequence**

MFSLDYFSLTSLQRYIDIYNTMIGGNTLADGTVQGINENINIRQKNNIDRKNLPTLKPLH  
KQLLSDRETLSPWPEAFKTKKEEVVGAIEDFYKNNIIISFKCCDNIVDITKQFIDIFSLNEDYE  
LNKIFIKNDISITSSISQDIFKDYRIIKEALWQKHINENPKAAKSKDLTGDKKEYFSRKNSSF  
SFEEIISSLLKLMGRKIDLFSYFKDNVEYRAHSIETTFIKWQKNKNDKKTTEKLLDNILNLQR  
VLKPLYLKA EVEKDILFYSIFDIYFESLNEIVKLYNKVRDFESKPKYSLEKFKLNFQNSTLL  
SGWDVNKEPDNTSILLKKDGLYYLIGIMDKKHNRVFNKLESSKGGYEKIEYKLLSGPNKMLPK  
VFFSNKSI GYYNPSALLEKYKSGVHKKGESFDLNFCHELIDFFKASIDKHEDWKNFNFKFS  
DTSEYADISGFYREVEQQGYKITFKNIDEEFINTLINEGKLYLFQIYNKDFSTFSKGTKNLH  
TLYWEMIFNEENLKNVYKLNGEAEIFYRKKSEIYSEDKMKYGHHYEELKDKFNYPPIKDKR  
FTMDKFQFHVPITMNFKATGRSYINEEVNDFLRQNSKDVKIIGINRGERHLIYLTMINAKGE  
IIQQYSLNEIVNSYNNKNFTVNYNEKLSKKEGERAIARENWGVVENIKELKEGYLSHAIHTI  
SNLIVENNAIVVLEDLNFEFKRERLKVESYIYQKFEKMLIDKLNLYLVDKKIDINENGLLKA  
LQLTNKFESFEKIGKQNGFLFFVNAWNITKICPVTGFVSLFDTRYQSVDKAREFFSKFDSIK  
YNEEKEHYEFVFDYSNFTDKAKDTKTWTVCSYGTRIKTFRNSEKNNNWDNKTVSPTEDLSK  
LLKSCDRDIKEFIIISQDKKEFFVELLEIFSLIVQMKNSSIINSEIDYIISPVANENGEFFDSR  
FANSSLPKNADANAAYNTARKGLMLLEKIRDSEIGKKIDMKITNTEWLNLFVQER

### **Humanized Cas12a coding sequence derived from *Agathobacter rectalis* strain 2789STDY5834884 (GeneBank ID: CZAJ01000001.1)**

AACAACGGCACAAACAATTTCCAGAACTTCATTGGCATTTCATCACTCCAGAAGACCCTGAG  
GAATGCCCTGACACCTACCGAGACAACCCAGCAATTCATTGTGAAGAACGGAATCATTAAGG  
AGGACGAACTGAGAGGCGAGAACCGCCAGATCCTGAAAGACATCATGGACGACTACTATCGC  
GGTTTCATCTCCGAGACACTCAGCAGCATTGATGATATTGATTGGACATCTCTGTTTGAGAA  
GATGGAAATCCAGCTGAAGAATGGCGACAACAAGGACACTCTCATTAAAGGAGCAAGCAGAGA  
AGAGAAAGGCTATCTACAAGAAGTTTGCAGACGACGATCGCTTCAAGAATATGTTTAGCGCA  
AAGCTGATAAGTGATATTCTCCAGAGTTTGTGATTCAACAACAACACTATTCTGCCAGCGA  
GAAGGAAGAGAAGACACAGGTCATCAAGCTCTTCTCTCGGTTTGCCACCTCATTCAAAGATT  
ACTTCAAGAATCGGGCAAATTTGTTTCTCTGCCGATGACATCTCATCTTCTCCTGTACAGA  
ATCGTTAATGATAACGCCGAAATCTTCTTCTCAAATGCCCTGGTGTACCGGAGAATCGTGAA  
GAATCTGAGTAACGACGACATCAATAAGATTAGCGGTGATATGAAGGACTCTCTGAAGAAGA  
TGTCCCTGGAGAAGATATACAGCTATGAGAAGTACGGCGAGTTCATCACTCAAGAGGGAATT  
AGCTTCTACAACGACATTTGTGGCAAGGTTAACTCATTTCATGAATCTCTACTGCCAGAAGAA  
CAAGGAGAATAAGAATCTGTACAACTGCGCAAACCTGCATAAGCAAATCCTGTGTATCGCCG  
ACACCTCTTATGAGGTGCCCTACAAGTTTGAGTCTGACGAAGAGGTGTACCAGTCCGTGAAC

GGATTTCCTGGACAACATCAGTTCTAAACACATCGTTCGAGCGGCTGAGGAAGATCGGCGACAA  
CTACAATGGCTATAACCTGGACAAGATATACATCGTCAGTAAGTTCTATGAAAGTGTGAGTC  
AGAAGACCTACCGGGACTGGGAGACTATCAACACCCGACTCGAAATCCACTACAATAACATC  
CTGCCTGGCAACGTAAGAGCAAGGCCGACAAGGTGAAGAAGGCCGTCAAGAACGACCTCCA  
GAAGAGCATCACCGAGATTAACGAACTGGTGAGTAACTACAAGCTCTGCCAGACGATAACA  
TTAAGGCAGAAACCTACATTCATGAGATTTCCATATACTGAACAACCTTTGAAGCTCAAGAG  
CTGAAATACAATCCCAGATTCATCTGGTGGAGAGCGAGCTGAAAGCATCCGAGCTGAAGAA  
CGTTCTCGACGTCATCATGAACGCCTTCCACTGGTGTAGCGTGTTCATGACTGAGGAGCTGG  
TCGATAAAGACAACAATTTCTACGCCGAGCTGGAAGAAATCTACGACGAGATATAACCCTGTG  
ATTAGCCTCTACAATCTGGTCCGGAACCTATGTGACCCAGAAGCCCTATTCAACTAAGAAGAT  
CAAGCTGAACTTTGGGATTCCTACCCTGGCCGACGGCTGGTCCAAGAGCAAAGAGTATTCCA  
ATAACGCAATCATCCTGATGAGAGACAACCTGTATTACCTCGGTATCTTTAACGCTAAGAAT  
AAGCCCAGAAAGAGATCATCGAAGGAAATACATCCGAGAACAAGGGCGACTACAAGAAGAT  
GATCTATAACCTGCTGCCTGGCCAAACAAGATGATCCCTAAGGTGTTCTGAGCAGCAAGA  
CCGGAGTCGAGACTTACAAGCCAAGTGCCTACATACTGGAGGGCTATAAGCAGAACAAGCAC  
CTGAAATCTAGCAAAGATTTGACATCACTTTCTGTGCGGACCTGATCGACTATTTCAAGAA  
TTGTATTGCCATCCACCCAGAGTGAAGAATTTGCGGATTCGACTTCTCTGACACCTCCACAT  
ACGAGGACATCAGTGGCTTCTATAGAGAAGTGGAGCTGCAAGGTTACAAGATCGACTGGACC  
TACATATCTGAGAAAGACATCGACCTGCTGCAAGAGAAAGGGCAGCTCTACCTCTTCCAAAT  
CTACAACAAGGACTTTAGTAAGAAGTCTACAGGTAATGACAATCTGCACACTATGTACCTGA  
AGAATCTCTTCTCTGAAGAGAACCTCAAAGACGTGGTGTGAACTGAACGGCGAAGCAGAA  
ATCTTCTTTGCAAATCATCCATTAAGAATCCTATCATAACAAGAAGGGTAGTATCCTGGT  
GAACAGGACATACGAAGCCGAGGAGAAAGATCAGTTCCGGCAACATTCAGATTGTGCGCAAGA  
CTATTCCCAGAAATATCTACCAGGAGCTGTACAAATACTTCAACGATAAGTCTGATAAAGAG  
CTGTGAGACGAAGCAGCCAAGCTGAAGAATGCTGTGGGACATCATGAAGCAGCTACTAACAT  
CGTGAAAGACTATAGATACACATACGACAAGTATTTCCCTGCACATGCCAATTACCATCAACT  
TCAAAGCCAATAAGACTTCTTTTATTAAACGACCCGATCCTCCAGTACATTGCAAAGGAGAAA  
GACCTGCACGTGATCGGGATTGATCGCGGAGAACGGAACCTCATCTACGTTTCAGTCATCGA  
CACATGCGGTAACATCGTCGAACAGAAGAGCTTCAACATTGTTAATGGGTATGATTACCAGA  
TCAAACCTCAAGCAACAGGAAGGCGCACGGCAGATTGCTCGCAAGGAGTGAAGGAAATTTGGC  
AAGATCAAGGAAATCAAGGAAGGATACCTCAGCCTCGTCATTCATGAAATCAGCAAGATGGT  
GATCAAGTATAACGCAATCATCGCTATGGAGGACCTGAGTTATGGCTTCAAGAAAGGCAGAT  
TCAAGGTGGAGCGGCAAGTCTACCAGAAATTCGAAACAATGCTGATCAACAAGCTGAACTAC  
CTGGTGTTCAAAGACATCAGCATAACCGAGAACGGAGGACTCCTGAAAGGCTACCAGCTCAC  
ATACATCCCAGAGAACTCAAGAATGTGGGCCACCAATGCGGCTGCATCTTCTACGTCCCTG  
CCGCTTACACCAGCAAGATAGATCCCCTACAGGATTCGTGAACATATTCAAATTCAGGAT  
CTGACAGTGGACGCCAAGAGGGAGTTTCAAGAAGTTTGATAGTATTGCTATGACAGCGA  
TAAGAATCTGTTCTGTTTACCTTTGACTACAACAACCTTATTACCCAGAATACCGTTATGT  
CCAAGTCTAGCTGGAGTGTGTATACCTACGGTGTTCGGATCAAGCGGAGGTTTGTCAATGGT  
AGATTCTCAAACGAAAGCGACACCATCGACATCACAAAGGACATGGAGAAGACACTGGAAAT  
GACTGACATAAACTGGAGAGATGGACACGACCTGCGGCAAGACATCATTGACTACGAGATCG  
TTCAGCACATCTTTGAAATCTTCAAGCTGACTGTTTCAAGATGCGGAATAGTCTGAGCGAGCTG  
GAGGACCGGAATTACGACCGCCTGATCTCACAGTCTGAAACGAGAATAACATCTTCTACGA  
TTCTGCCAAAGCAGGAGATGCCCTGCCAAAGGACGCTGATGCAAACGGTGCCTACTGCATCG

CCCTCAAAGGTCTGTACGAAATCAAGCAGATTACCGAGAATTGGAAGGAGGACGGGAAGTTC  
AGCAGAGACAAGCTCAAGATCAGCAATAAGGACTGGTTCGATTTTCATTCAGAACAAGCGCTA  
CCTG

### **ArCas12a protein sequence**

NNGTNNFQNFIFIGISSLQKTLRNALTPTETTQQFIVKNGI I KEDEL RGENRQILKDIMDDYYR  
GFISETLSSIDDIDWTSLF EKMEIQ LKNGDNKD TLIKEQAEKRKAIYKKFADDDR FKNM FSA  
KLISDILPEFVIHNNNYSASEKEEKTQVIKLF SRFATSFKDYFKNRANCF SADDI SSSSCHR  
IVNDNAEIFFSNALVYRRI VKNLSNDDINKISGDMKDSLKMSLEKIYSYEKYGEFITQEGI  
SFYNDICGKVNSFMNLYCQKNKENKNLYKLRK LHKQILCIADTSYEV PYKFESDEEVYQSVN  
GFLDNISSKHIVERLRKIGDNYNGYNLDKIYIVSKFYESVSQKTYRDWETINTALEIHYNNI  
LPGNGKSKADKVKKAVKNDLQKSITEINELVS NYKLC PDDNIKAETYIHEISHILNNFEAQE  
LKYNPEIHLVESELKASELKNVLDVIMNAFWCSVFMTEELVDKDN NFYAELEEIYDEIYPV  
ISLYNLVRNYVTQKPYSTKKIKLNF GIPTLADGWSKSK EYSNNAIILMRDNLYYLGI FNAKN  
KPEKKIIEGNTSENKGDYKKMIYNLLPGPNKMI PKVFLSSKTGVETYKPSAYILEGYKQNKH  
LKSSKDFDITFCRDLIDYFKNCIAIHP EWKNFGFDFS DTSTYEDISGFYREVELQGYKIDWT  
YISEKDIDLLQEKGQLYLFQIYNKDFS KSTGNDNLHTMYLKNLFSEENLKD VVLKLNGEAE  
IFFRKSSIKNPIIHKKGSILVNRTYEAE EKDQFGNIQIVRKTIPENIYQELYKYFNDKSDKE  
LSDEAAKLKNAVGHHEAATNIVKDYRYTYDKYFLHMPITINFKANKTSFINDRILQYIAKEK  
DLHVIGIDRGERNLIYVSVIDTCGNIVEQKSFNIVNGYDYQIKLKQQEGARQIARKEWKEIG  
KIKEIKEGYLSLVIHEISKMVIKYNAI IAMEDLSYGFKKGRFKVERQVYQKFETMLINKLNY  
LVFKDISITENGGLLKGYQLTYIPEKLN VGHQCGCIFYPAA YTSKIDPTTG FVNI FKFKD  
LTVDAKREFIKKFD SIRYDS DNLCFTFDYNNFITQNTVMSKSSWSVYTYGVRIKRRFVNG  
RFSNESDTIDITKMEKTLEMTDINWRDGHDLRQDIIDYEIVQHIFEIFKLT VQMRNSLSEL  
EDRNYDRLISPVLNENNI FYDSAKAGDALPKDADANGAYC IALKGLYEIKQITENWKEDGKF  
SRDKLKISNKDWFD FIQNKRYL

### **Humanized Cas12a coding sequence derived from *Bacteroidetes oral* taxon 274 str.**

#### **F0058 (GeneBank ID: NZ\_GG774890.1)**

AGGAAATTC AATGAGTTCGTGGGTCTGTATCCTATTAGTAAGACCCTCAGGTTTCGAGCTGAA  
ACCAATCGGCAAGACTGAGCATATCCAGAGAAACAAGCTCCTGGAGCATGATGCCGTTTC  
GCGCTGACGACTATGTCAAAGTGAAGAAGATCATTGACAAATACCATAAGTGTCTGATAGAT  
GAGGCCCTGTCTGGATTACCTTCGATACAGAAGCCGATGGGAGAAGCAATAACAGCCTGTC  
TGAGTACTATCTGTACTACAATCTCAAGAAGAGAAATGAGCAGGAACAGAAGACTTTCAAGA  
CAATCCAGAACAATCTGCGGAAGCAGATTGTCAACAAGCTGACCCAGAGTGAGAAGTATAAG  
AGAATTGATAAGAAAGAACTCATCACC ACTGATCTGCCAGACTTCCTGACTAATGAAAGCGA  
GAAAGA ACTGGTGGAGAAGTTCAAGA ACTTTACTACCTACTTTACCGAATTT CACAAGAACC  
GCAAGAATATGTACTCCAAGGAAGAGAAGTCCACC GCAATCGCTTTCCGCCTGATTAACGAG  
AACCTGCCAAAGTTTGTGATAACATCGCTGCTTTTCGAGAAAGTTGTGTCCTCACCTCTCGC  
AGAGAAGATCAATGCCCTGTACGAGGACTTTAAGGAGTATCTGAATGTGGAAGAAATCTCAC  
GGGTGTTTAGACTCGACTATTACGATGAACTGCTGACACAGAAACAGATTGATCTGTACAAC  
GCTATCGTCCGTGGTCCGACAGAGGAGGACAACAAGATCCAGATAAAGGACTGAACCAGTA  
TATCAACGAATACAATCAGCAGCAGACAGATCGGTCTAATCGGCTGCCAAAGCTGAAACCTC  
TCTATAAGCAAATCTCTCCGACAGAGAGAGCGTGT CATGGCTGCCTCCCAAGTTTGATAGC

GATAAGAATCTGCTGATTAAGATCAAAGAATGCTACGACGCCCTGTCCGAGAAGGAGAAAGT  
GTTTGACAAGCTGGAAAGTATTCTCAAGAGCCTGTCAACCTATGACCTGTCTAAGATATACA  
TTTCTAACGACTCTCAGCTGTCTTACATTAGCCAGAAGATGTTTGGACGGTGGGACATCATA  
TCTAAGGCCATCAGGGAGGATTGTGCTAAGAGGAATCCTCAGAAATCTCGGGAATCCCTGGA  
GAAGTTCGCCGAGAGGATAGATAAGAACTCAAGACCATCGACTCCATCAGCATCGGCGATG  
TGGATGAGTGCCTGGCCCAGCTGGGTGAAACCTACGTTAAGCGGGTGGAGGATTACTTTGTG  
GCAATGGGCGAATCCGAGATCGACGATGAGCAGACAGATAACCACCTCCTTCAAGAAGAACAT  
AGAGGGAGCATAACGAGTCCGTCAAGGAGCTGCTGAACAACGCTGATAACATTACAGACAATA  
ACCTGATGCAGGACAAGGGCAATGTGGAGAAGATCAAGACCCTGCTGGATGCAATCAAGGAC  
CTCCAGCGGTTTCAATTAAGCCACTCCTGGGTAAAGGTGACGAAGCAGACAAGGACGGCGTGT  
CTACGGTGAGTTTACATCCCTGTGGACCAAACCTCGATCAGGTTACTCCTCTCTATAACATGG  
TTCGGAATTACCTCACTTCAAAGCCTTATAGTACAAAGAAGATTAAGCTGAACTTTGAGAAC  
AGCACTCTCATGGATGGATGGGATCTGAATAAGGAGCCAGATAACACTACCGTGATATTCTG  
CAAAGATGGGCTGTATTACCTGGGCATTATGGGTAAAGAAGTACAATAGAGTGTGTTGTCGATA  
GAGAGGACCTGCCTCACGACGGCGAGTGCTACGACAAGATGGAGTACAAACTGCTGCCAGGT  
GCCAATAAGATGCTCCCTAAAGTGTCTTCTCCGAAACTGGTATTCAACGGTTCCTCCCATC  
CGAGGAACCTCCTGGGCAAGTACGAAAGAGGCACACATAAGAAAGGAGCTGGGTTTTGACCTGG  
GAGACTGTAGAGCACTGATTGATTTCTTTAAGAAGAGCATTGAAAGGCACGATGATTGGAAG  
AAGTTTGACTTCAAGTTCAGCGACACAAGCACATAACCAGGACATAAGTGAGTTCATAGAGA  
AGTGGAGCAGCAGGGCTATAAGATGTCCTTTAGAAAGGTTTCTGTGGACTATATCAAGTCTC  
TGGTGAAGAAGGTAAGCTGTATCTGTTCCAGATATACAACAAAGACTTCTCCGCACATTC  
AAAGGGACACCTAACATGCACACTCTCTATTGGAAGATGCTGTTTCGATGAGGAGAACCTGAA  
GGACGTGGTGTATAAGCTGAATGGAGAAGCTGAGGTGTTCTTCCGAAAATCTAGCATCACAG  
TGCAAAGCCCAACACACCCTGCTAATTCACCTATCAAGAACAAGAACAAGGATAATCAGAAG  
AAGGAATCAAAGTTTGAGTACGATCTCATCAAGGACCGCAGGTATACCGTGGACAAGTTCCT  
CTTTCACGTGCCTATAACCATGAATTTCAAGTCCGTCCGTGGTCTAACATCAATCAGCTCG  
TGAAGCGGCACATTCGGTCCGCAACCGACCTCCACATCATCGGCATAGATAGAGGAGAGCGG  
CATCTGCTGTACCTGACCGTTATCGACAGCAGAGGTAACATCAAAGAACAGTTCAGTCTGAA  
CGAGATAGTGAACGAGTATAACGGGAACACCTATCGGACCGATTACCACGAGCTGCTCGATA  
CCAGAGAAGGCGAGAGAACAGAAGCTAGACGGAACCTGGCAGACTATACAGAACATAACGCGAG  
CTGAAAGAGGGATACCTCTCCAGGTGATTCACAAGATCAGCGAGCTGGCTATCAAATACAA  
CGCCGTGATCGTGCTGGAGGATCTCAATTTTCGGCTTTATGAGGTCACGCCAGAAAGTGGAGA  
AGCAGGTGTATCAGAAATTCGAGAAGATGCTGATCGACAAGCTGAACTACCTGGTTCGATAAG  
AAGAAACCTGTCGCTGAAACCGGAGGGCTGCTGAGAGCCTACCAGCTGACCGGAGAATTTGA  
GTCCTTTTAAGACCCTGGGAAAAGCAGAGCGGCATTCTGTTCTACGTTCCCGCTTGGAAACCA  
GTAAGATTGATCCTGTGACTGGGTTTTGTCAATCTCTTCGATACCCACTATGAGAACATTGAG  
AAGGCTAAGGTGTTCTTTGACAAATTCAGAGTATCAGGTACAATTCGACAAGGATTGGTT  
CGAATTTGTCGTGGACGACTATACAAGGTTCTCACCTAAGGCAGAGGGCACCAGGAGGGACT  
GGACTATCTGCACCCAGGGAAAGCGCATTTCAGATATGTCGGAACCACCAGCGCAATAACGAG  
TGGGAGGGTCAAGAGATTGACCTGACCAAAGCATTCAAGGAGCACTTTGAAGCCTATGGCGT  
TGACATCTCAAAGGACCTGAGGGAGCAGATCAATACTCAGAACAAGAAAGAGTTCTTCGAAG  
AACTGCTGCGCCTGCTGCGGCTCACCTGCAAATGAGGAACTCCATGCCAAGTTCTGACATC  
GACTACCTGATCAGCCCAGTCGCCAACGACACCGGATGCTTCTTCGATTCAAGAAAGCAGGC  
CGAGCTGAAAGAGAATGCAGTTCCTCCCTATGAACGCTGATGCTAATGGTGCATACAACATCG

CTAGAAAGGGACTGCTGGCAATCCGCAAGATGAAACAAGAAGAGAACGACAGTGCTAAGATC  
AGCCTCGCTATATCCAACAAGGAGTGGCTCAAGTTTGCTCAGACTAAGCCATATCTGGAGGA  
C

### **BoCas12a protein sequence**

RKFNEFVGLYPI SKTLRFELKPIGKTLEHIQRNKLLEHDAVRADDYVKVKKIIDKYHKCLID  
EALSGFTFDTEADGRSNNSLSEYYLYYNLKKRNEQEOKTFKTIQNNLRKQIVNKLTQSEKYK  
RIDKKEELITDLPDFLTNESEKELVEKFKNFTTYFTEFHKNRKNMYSKEEKSTAI AFRLINE  
NLPKFVDNIAAFEKVVSSPLAEKINALYEDFKEYLNVEEISRVRFDYDELLTQKQIDLYN  
AIVGGRTEEDNKIQIKGLNQYINEYNQQQTDRSNRPLKPKPLYKQILSDRESVSWLPPKFDS  
DKNLLIKIKECYDALSEKEKVFDFKLESILKSLSTYDLSKIYISNDSQLSYISQKMFGRWDII  
SKAIREDCAKRNPQKSRESLEKFAERIDKKLKTIDSISIGDVDECLAQLGETYVVRVEDYFV  
AMGESEIDDEQTDTSFKKNIEGAYESVKELLNADNITDNNLMQDKGNVEKIKTLLDAIKD  
LQRFIKPLLGKGDADKDGVFYGEFTSLWTKLDQVTPLYNMVRNYLTSKPYSTKKIKLNFEN  
STLMDGWDLNKEPDNTTIVIFCKDGLYYLGMGKKNRVFVDREDLPHDGECDKMEYKLLPG  
ANKMLPKVFFSETGIQRFLPSEELGKYERGTHKKGAGFDLGDICALIDFFKKSIERHDDWK  
KFDKFSSTSTYQDISEFYREVEQQGYKMSFRKVSVDYIKSLVEEGKLYLFQIYNKDFSAHS  
KGTPNMHTLYWKMLFDEENLKDVVYKLNGEAEVFRKSSITVQSPHPANSPIKNKNKDNQK  
KESKFEYDLIKDRRYTVDKFLFHVPI TMNFKSVGGSNINQLVKRHIRSATDLHIIGIDRGER  
HLLYLTVIDSRNIKEQFSLNEIVNEYNGNTYRTDYHELLEDTREGERTEARRWQTIQNI  
LKEGYLSQVIHKISELAIKYNAVIVLEDLNFGMRSRQKVEKQVYQKFEKMLIDKLNLYLVDK  
KKPVAETGGLLRAYQLTGEFESFKTLGKQSGILFYVPAWNTSKIDPVTGFVNLFDTHYENIE  
KAKVFFDKFKSIRYNSDKDWFEEVVDYTRFSPKAEGTRRDWTICTQGKRIQICRNHQRNNE  
WEGQEIDLTKAFKEHFAYGVDISKDLREQINTQNKKEFFEELRLRLTLQMRNSMPSSDI  
DYLISPVANDTGCFDSDRKQAELENKAVLPMNADANGAYNIARKGLLAIRKMKQEENDSAKI  
SLAISNKEWLKFAQTKPYLED

### **Humanized Cas12a coding sequence derived from *Butyrivibrio* sp. NC3005 (GeneBank ID: NZ\_AUKC01000013.1)**

ATGTACTACCAGAACCTGACCAAGAAGTACCCCGTGAGCAAGACCATCCGCAACGAGCTGAT  
CCCCATCGGCAAGACCCTGGAGAACATCCGCAAGAACAACATCCTGGAGAGCGACGTGAAGC  
GCAAGCAGGACTACGAGCACGTGAAGGGCATCATGGACGAGTACCACAAGCAGCTGATCAAC  
GAGGCCCTGGACAACACTACATGCTGCCCAGCCTGAACCAGGCCGCCGAGATCTACCTGAAGAA  
GCACGTGGACGTGGAGGACCGCGAGGAGTTCAAGAAGACCCAGGACCTGCTGCGCCGCGAGG  
TGACCGGCCCTGAAGGAGCACGAGAACTACACCAAGATCGGCAAGAAGGACATCCTGGAC  
CTGCTGGAGAAGCTGCCCAGCATCAGCGAGGAGGACTACAACGCCCTGGAGAGCTTCCGCAA  
CTTCTACACCTACTTCAACCAGCTACAACAAGGTGCGCGAGAACCTGTACAGCGACGAGGAGA  
AGAGCAGCACCGTGGCCTACCGCCTGATCAACGAGAACCTGCCCAAGTTCCTGGACAACATC  
AAGAGCTACGCCTTCGTGAAGGCCGCCGCGCTGCTGGCCGACTGCATCGAGGAGGAGGAGCA  
GGACGCCCTGTTTCATGGTGGAGACCTTCAACATGACCCTGACCCAGGAGGGCATCGACATGT  
ACAACACTACCAGATCGGCAAGGTGAACAGCGCCATCAACCTGTACAACCAGAAGAACCACAAG  
GTGGAGGAGTTCAAGAAGATCCCCAAGATGAAGGTGCTGTACAAGCAGATCCTGAGCGACCG  
CGAGGAGGTGTTTCATCGGCGAGTTCAAGGACGACGAGACCCCTGCTGAGCAGCATCGGCGCCT  
ACGGCAACGTGCTGATGACCTACCTGAAGAGCGAGAAGATCAACATCTTCTTCGACGCCCTG

CGCGAGAGCGAGGGCAAGAACGTGTACGTGAAGAACGACCTGAGCAAGACCACCATGAGCAA  
CATCGTGTTCGGCAGCTGGAGCGCCTTCGACGAGCTGCTGAACCAGGAGTACGACCTGGCCA  
ACGAGAACAAGAAGAAGGACGACAAGTACTTCGAGAAGCGCCAGAAGGAGCTGAAGAAGAAC  
AAGAGCTACACCCTGGAGCAGATGAGCAACCTGAGCAAGGAGGACATCAGCCCCATCGAGAA  
CTACATCGAGCGCATCAGCGAGGACATCGAGAAGATCTGCATCTACAACGGCGAGTTCGAGA  
AGATCGTGGTGAACGAGCACGACAGCAGCCGCAAGCTGAGCAAGAACATCAAGGCCGTGAAG  
GTGATCAAGGACTACCTGGACAGCATCAAGGAGCTGGAGCACGACATCAAGCTGATCAACGG  
CAGCGGCCAGGAGCTGGAGAAGAACCTGGTGGTGTACGTGGGCCAGGAGGAGGCCCTGGAGC  
AGCTGCGCCCCGTGGACAGCCTGTACAACCTGACCCGCAACTACCTGACCAAGAAGCCCTTC  
AGCACCGAGAAGGTGAAGCTGAACTTCAACAAGAGCACCCCTGCTGAACGGCTGGGACAAGAA  
CAAGGAGACCGACAACCTGGGCATCCTGTTCTTCAAGGACGGCAAGTACTACCTGGGCATCA  
TGAACACCACCGCCAACAAGGCCTTCGTGAACCCCCCGCCGCAAGACCGAGAACGTGTTTC  
AAGAAGGTGGACTACAAGCTGCTGCCCGGCAGCAACAAGATGCTGCCCAAGGTGTTCTTCGC  
CAAGAGCAACATCGGCTACTACAACCCAGCACCGAGCTGTACAGCAACTACAAGAAGGGCA  
CCCACAAGAAgggcccCAGCTTCAGCATCGACGACTGCCACAACCTGATCGACTTCTTCAAG  
GAGAGCATCAAGAAGCACGAGGACTGGAGCAAGTTCGGCTTCGAGTTCAGCGACACCGCCGA  
CTACCGCGACATCAGCGAGTTCACCGCGAGGTGGAGAAGCAGGGCTACAAGCTGACCTTCA  
CCGACATCGACGAGAGCTACATCAACGACCTGATCGAGAAGAACGAGCTGTACCTGTTCCAG  
ATCTACAACAAGGACTTCAGCGAGTACAGCAAGGGCAAGCTGAACCTGCACACCCTGTACTT  
CATGATGCTGTTTCGACCAGCGCAACCTGGACAACGTGGTGTACAAGCTGAACGGCGAGGCCG  
AGGTGTTCTACCGCCCCGCCAGCATCGCCGAGAACGAGCTGGTGTCCACAAGGCCGGCGAG  
GGCATCAAGAACAAGAACCCCAACCGCGCCAAGGTGAAGGAGACCAGCACCTTCAGCTACGA  
CATCGTGAAGGACAAGCGCTACAGCAAGTACAAGTTCACCCGTCACATCCCCATCACCATGA  
ACTTCGGCGTGGACGAGGTGCGCCGCTTCAACGACGTGATCAACAACGCCCTGCGCACCGAC  
GACAACGTGAACGTGATCGGCATCGACCGCGGCGAGCGCAACCTGCTGTACGTGGTGGTGTAT  
CAACAGCGAGGGCAAGATCCTGGAGCAGATCAGCCTGAACAGCATCATCAACAAGGAGTACG  
ACATCGAGACCAACTACCACGCCCTGCTGGACGAGCGGAGGACGACCGCAACAAGGCCCGC  
AAGGACTGGAACACCATCGAGAACATCAAGGAGCTGAAGACCGGCTACCTGAGCCAGGTGGT  
GAACGTGGTGGCCAAGCTGGTGTGAAGTACAACGCCATCATCTGCCTGGAGGACCTGAACT  
TCGGCTTCAAGCGCGGCCCGCCAGAAGGTGGAGAAGCAGGTGTACCAGAAGTTCGAGAAGATG  
CTGATCGAGAAGCTGAACTACCTGGTGTATCGACAAGAGCCGCGAGCAGGTGAGCCCCGAGAA  
GATGGGCGGCGCCCTGAACGCCCTGCAGCTGACCAGCAAGTTCAGAGCTTCGCCGAGCTGG  
GCAAGCAGAGCGGCATCATCTACTACGTGCCCCGCTACCTGACCAGCAAGATCGACCCCACC  
ACCGGCTTCGTGAACCTGTTCTACATCAAGTACGAGAACATCGAGAAGGCCAAGCAGTTCCTT  
CGACGGCTTCGACTTCATCCGCTTCAACAAGAAGGACGACATGTTTCGAGTTCAGCTTCGACT  
ACAAGAGCTTCACCCAGAAGGCCCTGCGGCATCCGCAGCAAGTGGATCGTGTACACCAACGGC  
GAGCGCATCATCAAGTACCCCAACCCCGAGAAGAACAACCTGTTTCGACGAGAAGGTGATCAA  
CGTGACCGACGAGATCAAGGGCCTGTTCAAGCAGTACCGCATCCCCTACGAGAACGGCGAGG  
ACATCAAGGAGATCATCATCAGCAAGGCCGAGGCCGACTTCTACAAGCGCCTGTTCCGCCTG  
CTGCACCAGACCCTGCAGATGCGCAACAGCACCGACGGCACCCCGGACTACATCATCAG  
CCCCGTGAAGAACGACCGCGGCGAGTTCCTTCTGCAGCGAGTTCAGCGAGGGCACCATGCCCA  
AGGACGCCGACGCCAACGGCGCCTACAACATCGCCCCGAAGGGCCTGTGGGTGCTGGAGCAG  
ATCCGCCAGAAGGACGAGGGCGAGAAGGTGAACCTGAGCATGACCAACGCCGAGTGGCTGAA  
GTACGCCAGCTGCACCTGCTG

### **BsCas12a protein sequence**

MYYQNLTKKYPVSKTIRNELIPIGKTLENIRKNNILESDVKKRQDYEHVKGIMDEYHKQLIN  
EALDNYMLPSLNQAAEIYLLKKHVDVEDREEFKKTQDLLRREVTGRLKEHENYTKIGKKDILD  
LLEKLPSEEDYNALESFRNFYTYFTSYNKVRENLYSDEEKSSTVAYRLINENLPKFLDNI  
KSYAFVKAAGVLADCIEEEEQDALFMVETFNMTLTQEGIDMYNYQIGKVNSAINLYNQKNHK  
VEEFKKIPKMKVLYKQILSDREEVFIGEFKDDETLLSSIGAYGNVLMTYLKSEKINIFFDAL  
RESEGKNVYVKNLDSKTTMSNIVFGSWSAFDELLNQEYDLANENKKKDDKYFEKRQKELKKN  
KSYTLEQMSNLSKEDISPIENYIERISEDIEKICINYNGEFEKIVVNEHDSRKLSKNIKAVK  
VIKDYLDISIKELEHDIKLINGSQOELEKNLVVYVGQEEALEQLRPVDSLNLTRNYLTKKPF  
STEKVKNLNFNKSTLLNGWDKNKETDNLGILFFKDGKYYLGIMNTTANKAFVNPPAAKTENF  
KKVDYKLLPGSNKMLPKVFFAKSNIGYYNPSTELYSNYKKGTHKKGPSFSIDDCHNLI DFFK  
ESIKKHEDWSKFGFEFSDTADYRDISEFYREVEKQGYKLTFTDIDESYINDLIEKNELYLFQ  
IYNKDFSEYSKGLNLHTLYFMMLFDQRNLDNVYKLNGEAEVFPASIAENELVIHKAGE  
GIKKNPNRAKVKETSTFSYDIVKDKRYSKYKFTLHIPIITMNFVDEVRRFNDVINNALRTD  
DNVNVIGIDRGERNLLYVVVINSEKILEQISLNSIINKEYDIETNYHALDEREDDRNKAR  
KDWNTIENIKELKTGYLSQVVNVVAKLVLYKYNAIICLEDLNFQFKRGRQKVEKQVYQKFEKM  
LIEKLNLYLVIDKSREQVSPEKMGALNALQLTSKFKSFAELGKQSGIIYYVPAYLTSKIDPT  
TGFVNLFYIKYENIEKAKQFFDGFDFIRFNKKDDMFESFDYKSFTQKACGIRSKWIVYTNG  
ERIIKYPNPEKNNLFDEKVINVTDEIKGLFKQYRIPYENGEDIKEIIISKAEADFYKRLFRL  
LHQTLQMRNSTSDGTRDYIISPVKNDRGEFFCSEFSEGTMPKDADANGAYNIARKGLWVLEQ  
IRQKDEGEKVNLSMTNAEWLKYAQLHLL

### **Humanized Cas12a coding sequence derived from Candidate division WS6 bacterium GW2011\_GWA2\_37\_6 US52\_C0007 (GeneBank ID: LBTH0100007.1)**

ATGAAGAACGTGTTCCGGCGGCTTACCAACCTGTACAGCCTGACCAAGACCCTGCGCTTCGA  
GCTGAAGCCCACCAGCAAGACCCAGAAGCTGATGAAGCGCAACAACGTGATCCAGACCGACG  
AGGAGATCGACAAGCTGTACCACGACGAGATGAAGCCCATCCTGGACGAGATCCACCGCCGC  
TTCATCAACGACGCCCTGGCCCAGAAGATCTTCATCAGCGCCAGCCTGGACAACCTCCTGAA  
GGTGGTGAAGAACTACAAGGTGGAGAGCGCCAAGAAGAACATCAAGCAGAACCAGGTGAAGC  
TGCTGCAGAAGGAGATCACCATCAAGACCCTGGGCCTGCGCCGCGAGGTGGTGAGCGGCTTC  
ATCACCGTGAGCAAGAAGTGAAGGACAAGTACGTGGGCCTGGGCATCAAGCTGAAGGGCGA  
CGGCTACAAGGTGCTGACCGAGCAGGCCGTGCTGGACATCCTGAAGATCGAGTTCCCCAACA  
AGGCCAAGTACATCGACAAGTCCGCGGCTTCTGGACCTACTTCAGCGGCTTCAACGAGAAC  
CGCAAGAACTACTACAGCGAGGAGGACAAGGCCACCAGCATCGCCAACCGCATCGTGAACGA  
GAACCTGAGCCGCTACATCGACAACATCATCGCCTTCGAGGAGATCCTGCAGAAGATCCCCA  
ACCTGAAGAAGTTCAAGCAGGACCTGGACATCACCAGCTACAACCTACTACCTGAACCAGGCC  
GGCATCGACAAGTACAACAAGATCATCGGCGGCTACATCGTGGACAAGGACAAGAAGATCCA  
GGGCATCAACGAGAAGGTGAACCTGTACACCCAGCAGACCAAGAAGAAGCTGCCCAAGCTGA  
AGTTCTGTTCAAGCAGATCGGCAGCGAGCGCAAGGGCTTCGGCATCTTCGAGATCAAGGAG  
GGCAAGGAGTGGGAGCAGCTGGGCGACCTGTTCAAGCTGCAGCGCACCAAGATCAACAGCAA  
CGGCCGCGAGAAGGGCCTGTTTCGACAGCCTGCGCACCATGTACCGCGAGTTCTTCGACGAGA  
TCAAGCGCGACAGCAACAGCCAGGCCCGCTACAGCCTGGACAAGATCTACTTCAACAAGGCC  
AGCGTGAACACCATCAGCAACAGCTGGTTACCAACTGGAACAAGTTCCGCCGAGCTGCTGAA



CATCAAGGAGGACAAGAAGAACGGCGAGAAGAAGATCCCCGAGCAGATCAGCATCGAGGACA  
TCAAGGACAGCCTGAGCATCATCCCCAAGGAGAACCTGGAGGAGCTGTTCAAGCTGACCAAC  
CGCGAGAAGCACGACCGCACCCGCTTCTTCGGCAGCAACGCCTGGGTGACCTTCTGAAACAT  
CTGGCAGAACGAGATCGAGGAGAGCTTCAACAAGCTGGAGGAGAAGGAGAAGGACTTCAAGA  
AGAACGCCGCCATCAAGTTCCAGAAGAACAACCTGGTGCAGAAGAACTACATCAAGGAGGTG  
TGCGACCgcatgcTGGCCATCGAGCGCATGGCCAAGTACCACCTGCCCAAGGACAGCAACCT  
GAGCCGCGAGGAGGACTTCTACTGGATCATCGACAACCTGAGCGAGCAGCGGAGATCTACA  
AGTACTACAACGCCTTCCGCAACTACATCAGCAAGAAGCCCTACAACAAGAGCAAGATGAAG  
CTGAACTTCGAGAACGGCAACCTGCTGGGCGGCTGGAGCGACGGCCAGGAGCGCAACAAGGC  
CGGCGTGATCCTGCGCAACGGCAACAAGTACTACCTGGGCGTGCTGATCAACCGCGGCATCT  
TCCGCACCGACAAGATCAACAACGAGATCTACCGCACCGGCAGCAGCAAGTGGGAGCGCCTG  
ATCCTGAGCAACCTGAAGTTCCAGACCCTGGCCGGCAAGGGCTTCTGGGCAAGCACGGCGT  
GAGCTACGGCAACATGAACCCCGAGAAGAGCGTGCCCAGCCTGCAGAAGTTCATCCGCGAGA  
ACTACCTGAAGAAGTACCCCCAGCTGACCGAGGTGAGCAACACCAAGTTCCTGAGCAAGAAG  
GACTTCGACGCCGCCATCAAGGAGGCCCTGAAGGAGTGCTTCACCATGAACTTCATCAACAT  
CGCCGAGAACAAGCTGCTGGAGGCCGAGGACAAGGGCGACCTGTACCTGTTTCGAGATCACCA  
ACAAGGACTTCAGCGGAAGAAGAGCGGCAAGGACAACATCCACACCATCTACTGGAAGTAC  
CTGTTTCAGCGAGAGCAACTGCAAGAGCCCCATCATCGGCCTGAACGGCGGCGCCGAGATCTT  
CTTCCGCGAGGGCCAGAAGGACAAGCTGCACACCAAGCTGGACAAGAAGGGCAAGAAGGTGT  
TCGACGCCAAGCGCTACAGCGAGGACAAGCTGTTCTTCCACGTGAGCATCACCATCAACTAC  
GGCAAGCCCAAGAACATCAAGTTCCGCGACATCATCAACCAGCTGATCACCAGCATGAACGT  
GAACATCATCGGCATCGACCGCGGCGAGAAGCACCTGCTGTACTACAGCGTGATCGACAGCA  
ACGGCATCATCCTGAAGCAGGGCAGCCTGAACAAGATCCGCGTGGGCGACAAGGAGGTGGAC  
TTCAACAAGAAGCTGACCGAGCGGCCAACGAGATGAAGAAGGCCCGCCAGAGCTGGGAGCA  
GATCGGCAACATCAAGAACTTCAAGGAGGGCTACCTGAGCCAGGCCATCcacgagATCTACC  
AGCTGATGATCAAGTACAACGCCATCATCGTGCTGGAGGACCTGAACACCGAGTTC AAGGCC  
AAGCGCCTGAGCAAGGTGGAGAAGAGCGTGTACAAGAAGTTCGAGCTGAAGCTGGCCCGCAA  
GCTGAACCACCTGATCCTGAAGGACCGCAACACCAACGAGATCGGCGGCGTGCTGAAGGCCT  
ACCAGCTGACCCCCACCATCGGCGGCGGCGACGTGAGCAAGTTCGAGAAGGCCAAGCAGTGG  
GGCATGATGTTTCTACGTGCGCGCAACTACACCAGCACCCACCGACCCCGTGACCGGCTGGCG  
CAAGCACCTGTACATCAGCAACTTCAGCAACAACAGCGTGATCAAGAGCTTCTTCGACCCCA  
CCAACCGCGACACCGGCATCGAGATCTTCTACAGCGGCAAGTACCGCAGCTGGGGCTTCCGC  
TACGTGCAGAAGGAGACCGGCAAGAAGTGGGAGCTGTTTCGCCACCAAGGAGCTGGAGCGCTT  
CAAGTACAACCAGACCACCAAGCTGTGCGAGAAGATCAACCTGTACGACAAGTTCGAGGAGC  
TGTTCAAGGGCATCGACAAGAGCGCCGACATCTACAGCCAGCTGTGCAACGTGCTGGACTTC  
CGCTGGAAGAGCCTGGTGTACCTGTGGAACCTGCTGAACCAGATCCGCAACGTGGACAAGAA  
CGCCGAGGGCAACAAGAACGACTTCATCCAGAGCCCCGTGTACCCCTTCTTCGACAGCCGCA  
AGACCGACGGCAAGACCGAGCCCATCAACGGCGACGCCAACGGCGCCCTGAACATCGCCCGC  
AAGGGCCTGATGCTGGTGGAGCGCATCAAGAACAACCCCGAGAAGTACGAGCAGCTGATCCG  
CGACACCGAGTGGGACGCCTGGATCCAGAACTTCAACAAGGTGAAC

### **C6Cas12a protein sequence**

MKNVFGGFTNLYSLTKTLRFELKPTSKTQKLMKRNNVIQTDEEIDKLYHDEMKPILDEIHRR  
FINDALAQKIFISASLDNFLKVVKNYKVESAKKNIKQNQVKLLQKEITIKTLGLRREVVSGF

ITVSKKWKDKYVGLGIKLGKGDYKVLTEQAVLDILKIEFPNKAKYIDKFRGFWTFYFSGFNEN  
RKNYYSEEDKATSIANRIVNENLSRYIDNIIAFEEILQKIPNLKKFKQDLDTSYNYLNQA  
GIDKYNKIIGGYIVDKDKKIQQGINEKVNLYTQQTKKKLPKLFKQIGSERKGFIFEIKE  
GKEWEQLGDLFKLQRTKINSNGREKGLFDSLRTMYREFFDEIKRDSNSQARYSLDKIYFNKA  
SVNTISNSWFTNWNKFAELLNKEDKKNGEKKIPEQISIEDIKDSLIIIPKENLEELFKLTN  
REKHDRTRFFGSNAWVTFLNWQNEIEESFNKLEEKEKDFKNAAIKFQKNNLVQKNYIKEV  
CDRMLAIERMAKYHLPKDSNLSREEDFYWIIDNLSEQREIYKYNAFRNYISKKPYNKSMMK  
LNFENGNLLGGWSDGQERNKAGVILRNGNKYYLGVLINRGI FRTDKINNEYRTGSSKWERL  
ILSNLKFQTLAGKGF LGKHGVS YGNMNPESVPSLQKFIRENYLKKYPQLTEVSNTKFLSKK  
DFDAAIKEALKECF TMNFINIAENKLLAEADKGDLYLFEITNKDFSGKKS GKDNIHTIYWKY  
LFSESNCKSPIIGLNGGAEIFFREGQKDKLHTKLDKKGKVFDAKRYSEDKLFHVSITINY  
GKPKNIKFRDIINQLITSMNVNIIIGIDRGEKHLLYSVIDSNGIILKQGS LNKIRVGDKEVD  
FNKKLTERANEMKKARQSWEQIGNIKNFKEGYLSQAIHEIYQLMIKYNAIIVLEDLNTFEKA  
KRLSKVEKSVYKFKFELKLARKLNHLILKDRNTNEIGGVLKAYQLTPTIGGGDVSKFEKAKQW  
GMMFYVRANYTSTTDPVTGWRKHLYISNFSNSVIKSFFDPTNRDTGIEIFYSGKYRSWGFR  
YVQKETGKKWELFATKELERFKYNQTTKLCEKINLYDKFEELFKGIDKSADIYSQLCNVLD  
RWKSLVYLWNLNQRNVDKNAEGNKNDFIQSPVYFFDSRKT DGKTEPINGDANGALNIAR  
KGLMLVERIKNNPEKYEQLIRDTEWDAWIQNFNKVN

**Humanized Cas12a coding sequence derived from *Helcococcus kunzii* ATCC 51366  
(GeneBank ID: JH601088.1/AGEI0100022.1)**

ATGTTTCGAGAAGCTGAGCAACATCGTGAGCATCAGCAAGACCATCCGCTTCAAGCTGATCCC  
CGTGGGCAAGACCC TGGAGAACATCGAGAAGCTGGGCAAGCTGGAGAAGGACTTCGAGCGCA  
GCGACTTCTACCCCATCCTGAAGAACATCAGCGACGACTACTACCGCCAGTACATCAAGGAG  
AAGCTGAGCGACCTGAACCTGGACTGGCAGAAGCTGTACGACGCCACGAGCTGCTGGACAG  
CAGCAAGAAGGAGAGCCAGAAGAACCTGGAGATGATCCAGGCCAGTACCGCAAGGTGCTGT  
TCAACATCCTGAGCGGCGAGCTGGACAAGAGCGGCGAGAAGAACAGCAAGGACCTGATCAAG  
AACACAAGGCCCTGTACGGCAAGCTGTTCAAGAAGCAGTTCATCCTGGAGGTGCTGCCCGA  
CTTCGTGAACAACAACGACAGCTACAGCGAGGAGGACCTGGAGGGCCTGAACCTGTACAGCA  
AGTTCACCACCCGCTGAAGAACTTCTGGGAGACCCGCAAGAACGTGTTTACCAGCAAGGAC  
ATCGTGACCGCCATCCCCTTCGCGCCGTGAACGAGAACTTCGGCTTCTACTACGACAACAT  
CAAGATCTTCAACAAGAACATCGAGTACCTGGAGAACAAGATCCCCAACCTGGAGAACGAGC  
TGAAGGAGGCCGACATCCTGGACGACAACCGCAGCGTGAAGGACTACTTCACCCCCAACGGC  
TTCAACTACGTGATACCCAGGACGGCATCGACGTGTACCAGGCCATCCGCGGGCGGCTTCAC  
CAAGGAGAACGGCGAGAAGGTGCAGGGCATCAACGAGATCCTGAACCTGACCCAGCAGCAGC  
TGCGCCGCAAGCCCGAGACCAAGAACGTGAAGCTGGGCGTGCTGACCAAGCTGCGCAAGCAG  
ATCCTGGAGTACAGCGAGAGCACCAGCTTCTGATCGACCAGATCGAGGACGACAACGACCT  
GGTGGACCGCATCAACAAGTTCAACGTGAGCTTCTTCGAGAGCACCGAGGTGAGCCCCAGCC  
TGTTTCGAGCAGATCGAGCGCCTGTACAACGCCCTGAAGAGCATCAAGAAGGAGGAGGTGTAC  
ATCGACGCCCGCAACACCCAGAAGTTTCAGCCAGATGCTGTTTCGGCCAGTGGGACGTGATCCG  
CCGCGGCTACACCGTGAAGATCACCGAGGGCAGCAAGGAGGAGAAGAAGAAGTACAAGGAGT  
ACCTGGAGCTGGACGAGACCAGCAAGGCCAAGCGCTACCTGAACATCCGCGAGATCGAGGAG  
CTGGTGAACCTGGTGGAGGGCTTCGAGGAGGTGGACGTGTTTCAGCGTGCTGCTGGAGAAGTT  
CAAGATGAACAACATCGAGCGCAGCGAGTTCGAGGCCCCCATCTACGGCAGCCCCATCAAGC

TGGAGGCCATCAAGGAGTACCTGGAGAAGCACCTGGAGGAGTACCACAAGTGGAAAGCTGCTG  
CTGATCGGCAACGACGACCTGGACACCGACGAGACCTTCTACCCCCTGCTGAACGAGGTGAT  
CAGCGACTACTACATCATCCCCCTGTACAACCTGACCCGCAACTACCTGACCCGCAAGCACA  
GCGACAAGGACAAGATCAAGGTGAACCTTCGACTTCCCCACCCTGGCCGACGGCTGGAGCGAG  
AGCAAGATCAGCGACAACCGCAGCATCATCCTGCGCAAGGGCGGCTACTACTACCTGGGCAT  
CCTGATCGACAACAAGCTGCTGATCAACAAGAAGAACAAGAGCAAGAAGATCTACGAGATCC  
TGATCTACAACCAGATCCCCGAGTTCAGCAAGAGCATCCCCAACTACCCCTTACCAAGAAG  
GTGAAGGAGCACTTCAAGAACAACGTGAGCGACTTCCAGCTGATCGACGGCTACGTGAGCCC  
CCTGATCATCACCAAGGAGATCTACGACATCAAGAAGGAGAAGAAGTACAAGAAGGACTTCT  
ACAAGGACAACAACACCAACAAGAACTACCTGTACACCATCTACAAGTGGATCGAGTTCTGC  
AAGCAGTTCCTGTACAAGTACAAGggcccCAACAAGGAGAGCTACAAGGAGATGTACGACTT  
CAGCACCCCTGAAGGACACCAGCCTGTACGTGAACCTGAACGACTTCTACGCCGACGTGAACA  
GCTGCGCCTACCGCGTGCTGTTCAACAAGATCGACGAGAACACCATCGACAACGCCGTGGAG  
GACGGCAAGCTGCTGCTGTTCCAGATCTACAACAAGGACTTCAGCCCCGAGAGCAAGGGCAA  
GAAGAACCTGCACACCCTGTACTGGCTGAGCATGTTCCAGCGAGGAGAACCCTGCGCACCCGCA  
AGCTGAAGCTGAACGGCCAGGCCGAGATCTTCTACCGCAAGAAGCTGGAGAAGAAGCCCATC  
ATCCACAAGGAGGGCAGCATCCTGCTGAACAAGATCGACAAGGAGGGCAACACCATCCCCGA  
GAACATCTACCACGAGTGCTACCGCTACCTGAACAAGAAGATCGGCCGCGAGGACCTGAGCG  
ACGAGGCCATCGCCCTGTTCAACAAGGACGTGCTGAAGTACAAGGAGGCCCGCTTCGACATC  
ATCAAGGACCCGCGCTACAGCGAGAGCCAGTTCCTTCCACGTGCCCATCACCTTCAACTG  
GGACATCAAGACCAACAAGAACGTGAACCAGATCGTGAGGGCATGATCAAGGACGGCGAGA  
TCAAGCACATCATCGGCATCGACCGCGGCGAGCGCCACCTGCTGTACTACAGCGTGATCGAC  
CTGGAGGGCAACATCGTGGAGCAGGGCAGCCTGAACACCCTGGAGCAGAACCCTTCGACAA  
CAGCACCGTGAAGGTGGACTACCAGAACAAGCTGCGCACCCGCGAGGAGGACCGCGACCCGG  
CCCGCAAGAAGTGGACCAACATCAACAAGATCAAGGAGCTGAAGGACGGCTACCTGAGCCAC  
GTGGTGCACAAGCTGAGCCGCTGATCATCAAGTACGAGGCCATCGTGATCATGGAGAACCCT  
GAACCAGGGCTTCAAGCGCGGCCGCTTCAAGGTGGAGCGCCAGGTGTACCAGAAGTTCGAGC  
TGGCCCTGATGAACAAGCTGAGCGCCCTGAGCTTCAAGGAGAAGTACGACGAGCGCAAGAAC  
CTGGAGCCCAGCGGCATCCTGAACCCCATCCAGGCCTGCTACCCCGTGGACGCCTACCAGGA  
GCTGCAGGGCCAGAACGGCATCGTGTTCTACCTGCCCGCCGCTACACCAGCGTGATCGACC  
CCGTGACCGGCTTACCAACCTGTTCCGCTGAAGAGCATCAACAGCAGCAAGTACGAGGAG  
TTCATCAAGAAGTTCAGAACATCTACTTCGACAACGAGGAGGAGGACTTCAAGTTCATCTT  
CAACTACAAGGACTTCGCCAAGGCCAACCTGGTGATCCTGAACAACATCAAGAGCAAGGACT  
GGAAGATCAGCACCCGCGGCGAGCGCATCAGCTACAACAGCAAGAAGAAGGAGTACTTCTAC  
GTGCAGCCCACCGAGTTCCTGATCAACAAGCTGAAGGAGCTGAACATCGACTACGAGAACAT  
CGACATCATCCCCCTGATCGACAACCTGGAGGAGAAGGCCAAGCGCAAGATCCTGAAGGCC  
TGTTTCGACACCTTCAAGTACAGCGTGAGCTGCGCAACTACGACTTCGAGAACGACTACATC  
ATCAGCCCCACCGCGACGACAACGGCAACTACTACAACAGCAACGAGATCGACATCGACAA  
GACCAACCTGCCAACAACGGCGACGCCAACGGCGCCTTCAACATCGCCCGCAAGGGCCTGC  
TGCTGAAGGACCGCATCGTGAACAGCAACGAGAGCAAGGTGGACCTGAAGATCAAGAACGAG  
GACTGGATCAACTTCATCATCAGC

**HkCas12a protein sequence**

MF EKLSNIVSISK TIRFKLIPVGK TLENIEKLGKLEKDFERSDFYPILKNISDDYYRQYIKE  
KLSDLNLDWQKLYDAHELLDSSKESQKNLEMIQAQYRKVLFNLSGELDKS GEKNSKDLIK  
NNKALYGLFKKQFILEVLPDFVNNND SYSEEDLEGLNLYSKFTTRLKNFWETRKNVFTDKD  
IVTAIPFRAVNENFGFYDNIKIFNKNI EYLENKIPNLENELKEADILDDNRSVKDYFTPNG  
FNYVITQDGDVYQAIRGGFTKENGEKVQGINEILNLTQQQLRRKPETKNVKLGVLTKLRKQ  
ILEYSESTSFLIDQIEDDNDLVDRINKFNVSFFESTEVSPSLFEQIERLYNALKS IKKEEVY  
IDARNTQKFSQMLFGQWDVIRRGYTVKITEGSKEEKKKYKEYLELDETSKAKRYLNIREIEE  
LVNLVEGFEEVDVFSVLLEKFKMNNIERSEFEAPIYGSP IKLEAIKEYLEKHLEEYHKWLL  
LIGNDDLDTDETFYPLLNEVISDYIIPLYNLTRNYLTRKHS DKDKIKVNFDFPTLADGWSE  
SKISDNRSIILRKGGYYLGLILDNKLLINKKNKSKKIYEILINQIPEFSKSI PNYPFTKK  
VKEHFKNNSDFQLIDGYVSP LIITKEIYDIKKEKKYKDFYKDNNTNKNLYTIYKWIEFC  
KQFLYKYKGPNKESYKEMYDFSTLKDTSLYVNLNDFYADVNSCAYRVLFNKIDENTIDNAVE  
DGKLLLFQIYNKDFSPESKGGKNLHTLYWLSMFSEENLRTRKLLKLNQAEIFYRKKLEKKPI  
IHKEGSILLNKIDKEGNTIPENIYHECYRYLNKKIGREDLSDEAIALFNKDVLYKKEARFDI  
IKDRRYSESQFFFHVPIITFNWDIKTNKNVNQIVQGM IKDGEIKHIIGIDRGERHLLYYSVID  
LEGNIVEQGS LNTLEQNRFDNSTVKVDYQNKLR TREEDRDRARKNWTNINKIKELKDG YLSH  
VVHKL SRLIIKYEAI VIMENLNQGFKRGRFKVERQVYQK FELALMNKLSALS FKEYDERKN  
LEPSGILNPIQACY PVDAYQELQGQNGIVFYLPAA YTSVIDPVTGFTNLFR LKSINSSKYEE  
FIKKFKNIYFDNEEEDFKFI FNYKDFAKANLVI LNNIKSKDWKISTRGERISYNSKKKEYFY  
VQPTEFLINKL KELNIDYENIDI IPLIDNLEEKAKRKILKALFDTFKYSVQLRNYDFENDYI  
ISPTADDNGNYNSNEIDI DKTNLPNNGDANGAFNIARKGLLLKDRI VNSNESKVDLKI KNE  
DWINFIIS

**Humanized Cas12a coding sequence derived from *Lachnospira pectinoschiza* strain 2789STDY5834836 (GeneBank ID: CZAK01000004.)**

ATGATCATGAACAACGTGACCGGCGACTTCAGCGAGTTCGTGGCCATCAGCAAGGTGCAGAA  
GACCCTGCGCAACGAGCTGCGCCCCACCCCCCTGACCATGAAGCACATCAAGCAGAAGGGCA  
TCATCACCGAGGACGAGTACAAGACCCAGCAGAGCCTGGAGCTGAAGCGCATCGCCGACGGC  
TACTACCGCGACTACATCACCCACAAGCTGAACGACACCAACAACCTGGACTTCCGCAACCT  
GTTTCGAGGCCATCGAGGAGAAGTACAAGAAGAACGACAAGGACAACCGCGACAAGCTGGACC  
TGGTGGAGAAGAGCAAGCGCGGCGAGATCGCCAAGCTGCTGAGCGCCGACGACA ACTTCAAG  
AGCATGTTTCGAGGCCAAGCTGATCACCCAGCTGCTGCCCGTGTACGTGGAGCAGAACTACAT  
CGGCGAGGACAAGGAGAAGGCCCTGGAGACCATCGCCCTGTTCAAGGGCTTACCACCTACT  
TCACCGACTACTTCAACATCCGCAAGAACATGTTCAAGGAGAACGGCGGCCAGCAGCATC  
TGCTACCGCATCGTGAACGTGAACGCCAGCATCTTCTACGACAACCTGAAGACCTT CATGTG  
CATCAAGGAGAAGGCCGAGACCGAGATCGCCCTGATCGAGGAGGAGCTGACCGAGCTGCTGG  
ACAGCTGGCGCCTGGAGCACATCTTACGCGAGGACTACTACAACGAGCTGCTGGCCCAGAAG  
GGCATCGACTACTACAACCAGATCTGCGGGCAGCTGAACAAGCACATGAACCTGTACTGCCA  
GCAGAACAAGCTGAAGGCCAACGTGTTCAAGATGACCAAGCTGCAGAAGCAGATCATGGGCA  
TCAGCGAGAAGGCCCTTCGAGATCCCCCATGTACCAGAACGACGAGGAGGTGTACGCCGCC  
TTCAACGGCTT CATCAGCCGCTGGAGGAGGTGAAGCTGATCGACCGCCTGGGCAACGTGCT  
GCAGAACAGCAACATCTACGACACCGCCAAGATCTACATCAACGCCCGCTGCTACACCAACG  
TGAGCAGCTACGTGTACGGCGCTGGGGCGTGATCGAGAGCGCCATCGAGCGCTACTGGTAC  
AACACCATCGCCGCAAGGGCCAGAGCAAGGCCAAGAAGATCGAGAAGGCCAAGAAGGACAA

CAAGTTCATGAGCGTGAAGGAGCTGGACAGCATCGTGAGCGACTACGAGCCCGACTACTTCA  
ACGCCAGCAACATGGACGACGACAACAGCGGCCGCGCCTTCAGCGGCCACGGCGTGCTGGGC  
TACTTCAACAAGATGAGCAAGCTGCTGGCCAACATGAGCCTGCACACCATCACCTACGACAG  
CGGCGACAGCCTGATCGAGAACAAGGAGACCGCCCTGAACATCAAGAAGGACCTGGACGACA  
TCATGAGCATCTACCACTGGCTGCAGACCTTCATCATCGACGAGGTGGTGGAGAAGGACAAC  
GCCTTCTACGCCGAGCTGGAGGACATCTACTACGAGCTGGAGAACGTGGTGACCCTGTACGA  
CCGCATCCGCAACTACGTGACCCGCAAGCCCTACAGCACCCAGAAGTTCaagcttAACTTCG  
CCAGCCCCACCTGGCCAGCGGCTGGAGCCGAGCAAGGAGTTCGACAACAACGCCATCATC  
CTGCTGCGCAACAACAAGTACTACATCGCCATCTTCAACGTGAACAACAAGCCCGACAAGCA  
GATCATCAAGGGCAGCGAGGAGCAGCGCCTGAGCACCGACTACAAGAAGATGGTGTACAACC  
TGCTGCCCCGCCCAACAAGATGCTGCCCTGGGTGTTTCATCAAGAGCAACACCGGCAAGCGC  
GACTACAACCCCAGCAGCTACATCCTGGAGGGCTACGAGAAGAACCGCCACATCAAGAGCAG  
CGGCAACTTCGACATCAACTACTGCCACGACCTGATCGACTACTACAAGGCCTGCATCAACA  
AGCACCCCAGGTGGAAGAACTACGGCTTCAAGTTCAAGGAGACCACCCAGTACAACGACATC  
GGCCAGTTCTACAAGGACGTGGAGAAGCAGGGCTACAGCATCAGCTGGGCCTACATCAGCGA  
GGCCGACATCAACCGCCTGGACGAGGAGGGCAAGATCTACCTGTTTCGAGATCTACAACAAGG  
ACCTGAGCAGCCACAGCACCGGCAAGGACAACCTGCACACCATGTACCTGAAGAACATCTTC  
AGCGAGGACAACCTGAAGAACATCTGCATCGAGCTGAACGGCAACGCCGAGCTGTTCTACCG  
CAAGAGCAGCATGAAGCGCAACATCACCCACAAGAAGGACACCGTGCTGGTGAACAAGACCT  
ACATCAACGAGGCCGCGCTGCGCGTGAGCCTGACCGACGAGGACTACATCAAGGTGTACAAC  
TACTACAACAACGACTACGTGATCGACGTGGAGAAGGACAAGAAGCTGGTGGAGATCCTGGA  
GCGCATCGGCCACCGCAAGAACCCCATCGACATCATCAAGGACAAGCGCTACACCGAGGACA  
AGTACTTTCCTGCACTTCCCCATCACCATCAACTACGGCGTGGACGACGAGAACATCAACGCC  
AAGATGATCGAGTACATCGCCAAGCACAACAACATGAACGTGATCGGCATCGACCCGCGGCA  
GCGCAACCTGATCTACATCAGCGTGATCAACAACAAGGGCAACATCATCGAGCAGAAGAGCT  
TCAACCTGGTGAACAACACTACGACTACAAGAACAAGCTGAAGAACATGGAGAAGACCCGCGAC  
AACCCCCGCAAGAACTGGCAGGAGATCGGCAAGATCAAGGACGTGAAGAACGGCTACCTGAG  
CGGCGTGATCAGCAAGATCGCCCGCATGGTGGTGGACTACAACGCCATCATCGTGATGGAGG  
ACCTGAACCGCGGCTTCAAGCGCGCCGCTTCAAGGTGGAGCGCCAGGTGTACCAGAAGTTC  
GAGAACATGCTGATCAGCAAGCTGAACTACCTGGTGTTCAGGAGAAGAAGGCCGACGAGAA  
CGGCGGCATCCTGAAGGGCTACCAGCTGACCTACCTGCCAAGAGCGCCCTGCAGATCGGCA  
AGCAGTGCGGCTGCATCTTCTACGTGCCCGCCGCTACACCAGCAAGATCGACCCCGCCACC  
GGCTTCATCAACATCTTCGACTTCAAGAAGTACAGCGGCAGCGCCATCAACGCCAAGGTGAA  
GGACAAGAAGGAGTTCCTGATGAGCATGAACAGCATCCGCTACGTGAACGAGGGCAGCGCCG  
AGTACGAGAAGATCGGCCACCGCCAGCTGTTTCGCTTCAGCTTCGACTACAACAACCTTCAAG  
ACCTACAACGTGAGCATCCCCGTGAACGAGTGGACCACCTACACCTACGGCGAGCGCATCAA  
GAAGCTGTACAAGGACGGCCGCTGGAGCGGCAGCGAGGTGCTGAACCTGACCGAGGACCTGA  
TCGAGCTGATGGAGCAGTACGGCATCGAGTACAAGGACGGCCACGACATCCGCGAGGACATC  
AGCCACATGGACGAGATGCGCAACGCCGACTTCATCTGCAACCTGTTTCGAGAAGTTCAGTA  
CACCGTGCAGCTGCGCAACAGCAAGAGCGAGGGCCGAGGGCGACGACTACGACCCGCTGGTGA  
GCCCCGTGCTGAACAGCCACAACGGCTTCTTCGACAGCAGCGACTACAAGGAGAACGAGAAG  
AGCGACGACATCATCGACGACAAGCAGATCATGCCAAGGACGCCGACGCCAACGGCGCCTA  
CTGCATCGCCCTGAAGGGCCTGTACGAGATCAACAAGATCAAGGAGAAGTGGAGCGACGACA

AGAAGCTGAAGGAGAGCGAGCTGTACATCGGCCTGACCGAGTGGCTGGACTACATCCAGAAC  
CGCCGCTTCGAG

### **LpCas12a protein sequence**

MIMNVTGDFSEFVAISKVQKTLRNELRPTPLTMKHIKQKGIITEDEYKTQQSLELKRIADG  
YYRDYITHKLNDTNLDFRNLFEAIEEKYKKNKDNDRDKLDLVEKSKRGEIAKLLSADDNFK  
SMFEAKLITQLLPVYVEQNYIGEDKEKALETIALFKGFTTYFTDYFNIRKNMFKENGASSI  
CYRIVNVNASIFYDNLKTFMCIKEKAETEIALIEEELTELLDSWRLEHIFSEDYYNELLAQK  
GIDYYNQICGDVNHMNLQYQONKLNKLVFKMTKLQKQIMGISEKAFEIPPMYQNDEEVYAA  
FNGFISRLEEVKLIIDRLGNVLQNSNIYDTAKIYINARCYTNVSSYVYGGWGVIESAIERYWY  
NTIAGKGQSKAKKIEKAKKDNKFMVSKELDSIVSDYEPDYFNASNMDDDNSGRAFSGHVGLG  
YFNKMSKLLANMSLHTITYDSGDSLIENTALNIKKDLDDIMSIYHWLQTFIIDEVVEKDN  
AFYAELEDIYYELENVVTLYDRIRNYVTRKPYSTQKFKLNFASPTLASGWSRSKEFDNNAII  
LLRNNKYYYIAIFNVNPKPKQIIKGGSEQRLSTDYKMMVYNLLPGPNKMLPWVFIKSNTGKR  
DYNPSSYILEGYEKNRHIKSSGNFDINYCHDLIDYKACINKHPEWKNYGFKFKETTQYNDI  
GQFYKDVEKQGYISWAYISEADINRLDEEGKIYLFEIYNKDLSSHSTGKDNLHTMYLKNIF  
SEDNLKNICIELNGNAELFYRKSSMKRNITHKKDVLVNKTYINEAGVRVSLTDEDYIKVYN  
YNNDYVIDVEKDKKLVEILERIGHRKNPIDIIKDKRYTEDKYFLHFPITINYGVDDENINA  
KMIEYIAKHNNMNVIGIDRGERNLIYISVINNKGNIIEQKSFNLVNNYDYKNKLNMEKTRD  
NARKNWQIEGKIKDVKNGLSGVISKIARMVVDYNAIIVMEDLNRGFKRGRFKVERQVYQKF  
ENMLISKLNLYLVFKEKKADENGGILKGYQLTYLPKSALQIGKQCGCIFVPAAYTSKIDPAT  
GFINIFDFKKYSGSAINAKVKDKKEFLMSMNSIRYVNEGSAEYEKIGHRQLFAFSFDYNNFK  
TYNVSIPVNEWTTYTYGERIKKLYKDGRWSGSEVLNLTEDLIELMEQYGIEYKDGHDIREDI  
SHMDEMNRADFICNLFEKFKYTVQLRNSKSEAEGDDYDRLVSPVLNSHNGFFDSSDYKENEK  
SDDIIDDKQIMPKDADANGAYCIALKGLYEINKIKENWSDDKKLKESELYIGVTEWLDYIQN  
RRFE

### **Humanized Cas12a coding sequence derived from *Oribacterium* sp. NK2B42 (GeneBank ID: NZ\_KE384190.1)**

ATGGAGACCGAGATCCTGAAGTACGACTTCTTCGAGCGCGAGGGCAAGTACATGTACTACGA  
CGGCCTGACCAAGCAGTACGCCCTGAGCAAGACCATCCGCAACGAGCTGGTGCCCATCGGCA  
AGACCCTGGACAACATCAAGAAGAACCGCATCCTGGAGGCCGACATCAAGCGCAAGAGCGAC  
TACGAGCACGTGAAGAAGCTGATGGACATGTACCACAAGAAGATCATCAACGAGGCCCTGGA  
CAACTTCAAGCTGAGCGTGCTGGAGGACGCCGCCGACATCTACTTCAACAAGCAGAACGACG  
AGCGCGACATCGACGCCTTCTGAAGATCCAGGACAAGCTGCGCAAGGAGATCGTGAGCAG  
CTGAAGGGCCACACCGACTACAGCAAGGTGGGCAACAAGGACTTCTGGGCCTGCTGAAGGC  
CGCCAGCACCGAGGAGGACCGCATCCTGATCGAGAGCTTCGACAACCTTCTACACCTACTTCA  
CCAGCTACAACAAGGTGCGCAGCAACCTGTACAGCGCCGAGGACAAGAGCAGCACCGTGGCC  
TACCGCCTGATCAACGAGAACCTGCCAAGTTCTTCGACAACATCAAGGCCTACCGCACCGT  
GCGCAACGCCGGCGTGATCAGCGGCGACATGAGCATCGTGAGCAGGACGAGCTGTTGAGG  
TGGACACCTTCAACCACACCTGACCCAGTACGGCATCGACACCTACAACCACATGATCGGC  
CAGCTGAACAGCGCCATCAACCTGTACAACCAGAAGATGCACGGCGCCGCGCAGCTTCAAGAA  
GCTGCCAAGATGAAGGAGCTGTACAAGCAGCTGCTGACCGAGCGCGAGGAGGAGTTCATCG  
AGGAGTACACCGACGACGAGGTGCTGATCACCAGCGTGCACAACCTACGTGAGCTACCTGATC

GACTACCTGAACAGCGACAAGGTGGAGAGCTTCTTCGACACCCTGCGCAAGAGCGACGGCAA  
GGAGGTGTTTCATCAAGAACGACGTGAGCAAGACCACCATGAGCAACATCCTGTTTCGACAACT  
GGAGCACCATCGACGACCTGATCAACCACGAGTACGACAGCGCCCCGAGAACGTGAAGAAG  
ACCAAGGACGACA<sup>agtact</sup>TCGAGAAGCGCCAGAAGGACCTGAAGAAGAACAAGAGCTACAG  
CCTGAGCAAGATCGCCGCCCTGTGCCGCGACACCACCATCCTGGAGAAGTACATCCGCCGCC  
TGGTGGACGACATCGAGAAGATCTACACCAGCAACAACGTGTTTCAGCGACATCGTGCTGAGC  
AAGCACGACCCGAGCAAGAAGCTGAGCAAGAACACCAACGCCGTGCAGGCCATCAAGAACAT  
GCTGGACAGCATCAAGGACTTCGAGCACGACGTGATGCTGATCAACGGCAGCGGCCAGGAGA  
TCAAGAAGAACCTGAACGTGTACAGCGAGCAGGAGGCCCTGGCCGGCATCCTGCGCCAGGTG  
GACCACATCTACAACCTGACCCGCAACTACCTGACCAAGAAGCCCTTCAGCACCGAGAAGAT  
CAAGCTGAACCTCAACCGCCCCACCTTCCTGGACGGCTGGGACAAGAACAAGGAGGAGGCCA  
ACCTGGGCATCCTGCTGATCAAGGACAACCGCTACTACCTGGGCATCATGAACACCAGCAGC  
AACAGGCCTTCGTGAACCCCCCAAGGCCATCAGCAACGACATCTACAAGAAGGTGGACTA  
CAAGCTGCTGCCGGCCCCAACAAGATGCTGCCAAGGTGTTCTTCGCCACCAAGAACATCG  
CCTACTACGCCCCCAGCGAGGAGCTGCTGAGCAAGTACCGCAAGGGCACCCACAAGAAGGGC  
GACAGCTTCAGCATCGACGACTGCCGCAACCTGATCGACTTCTTCAAGAGCAGCATCAACAA  
GAACACCGACTGGAGCACCTTCGGCTTCAACTTCAGCGACACCAACAGCTACAACGACATCA  
GCGACTTCTACCGCGAGGTGGAGAAGCAGGGCTACAAGCTGAGCTTCACCGACATCGACGCC  
TGCTACATCAAGGACCTGGTGGACAACAACGAGCTGTACCTGTTCCAGATCTACAACAAGGA  
CTTCAGCCCCTACAGCAAGGGCAAGCTGAACCTGCACACCCTGTACTTCAAGATGCTGTTTCG  
ACCAGCGCAACCTGGACAACGTGGTGTACAAGCTGAACGGCGAGGCCGAGGTGTTCTACCGC  
CCCGCCAGCATCGAGAGCGACGAGCAGATCATCCACAAGAGCGGCCAGAACATCAAGAACAA  
GAACCAGAAGCGCAGCAACTGCAAGAAGACCAGCACCTTCGACTACGACATCGTGAAGGACC  
GCCGCTACTGCAAGGACAAGTTCATGCTGCACCTGCCCATCACCGTGAACCTTCGGCACCAAC  
GAGAGCGGCAAGTTCAACGAGCTGGTGAACAACGCCATCCGCGCCGACAAGGACGTGAACGT  
GATCGGCATCGA<sup>ccg</sup><sup>cg</sup>CGAGCGCAACCTGCTGTACGTGGTGGTGGTGGACCCCTGCGGCA  
AGATCATCGAGCAGATCAGCCTGAACACCATCGTGGACAAGGAGTACGACATCGAGACCGAC  
TACCACCAGCTGCTGGACGAGAAGGAGGGCAGCCGCGACAAGGCCCGCAAGGACTGGAACAC  
CATCGAGAACATCAAGGAGCTGAAGGAGGGCTACCTGAGCCAGGTGGTGAACATCATCGCCA  
AGCTGGTGTGCTGAAGTACGACGCCATCATCTGCCTGGAGGACCTGAACTTCGGCTTCAAGCGC  
GGCCGCCAGAAGGTGGAGAAGCAGGTGTACCAGAAGTTCGAGAAGATGCTGATCGACAAGAT  
GAACTACCTGGTGTGCTGGACAAGAGCCGCAAGCAGGAGAGCCCCAGAAGCCCGCGGCGCCC  
TGAACGCCCTGCAGCTGACCAGCGCCTTCAAGAGCTTCAAGGAGCTGGGCAAGCAGACCGGC  
ATCATCTACTACGTGCCCCCTACCTGACCAGCAAGATCGACCCACCACCGGCTTCGCCAA  
CCTGTTCTACATCAAGTACGAGAGCGTGGACAAGGCCCGCGACTTCTTCAGCAAGTTCGACT  
TCATCCGCTACAACCAGATGGACAACACTACTTCGAGTTCGGCTTCGACTACAAGAGCTTCACC  
GAGCGCGCCAGCGGCTGCAAGAGCAAGTGGATCGCCTGCACCAACGGCGAGCGCATCGTGAA  
GTACCGCAACAGCGACAAGAACAACAGCTTCGACGACAAGACCGTGATCCTGACCGACGAGT  
ACCGCAGCCTGTTTCGACAAGTACCTGCAGAACTACATCGACGAGGACGACCTGAAGGACCAG  
ATCCTGCAGATCGACAGCGCCGACTTCTACAAGAACCTGATCAAGCTGTTCCAGCTGACCCT  
GCAGATGCGCAACAGCAGCAGCGACGGCAAGCGCGACTACATCATCAGCCCCGTGAAGAACT  
ACCGCGAGGAGTCTTCTGCAGCGAGTTCAGCGACGACACCTTCCCCCGCGACGCCGACGCC  
AACGGCGCCTACAACATCGCCCGCAAGGGCCTGTGGGTGATCAAGCAGATCCGCGAGACCAA

GAGCGGCACCAAGATCAACCTGGCCATGAGCAACAGCGAGTGGCTGGAGTACGCCAGTGCA  
ACCTGCTG

### **OsCas12a protein sequence**

METEILKYDFFEREGKMYMYDGLTKQYALSKTIRNELVPIGKTLDNIKKNRILEADIKRKS  
YEHVKKLMMDMYHKKIINEALDNFKLSVLEDAADIYFNKQNDERDIDAFLKIQDKLRKEIVEQ  
LKGHTDYSKVGKDFLGLLKAASTEEDRILIESFDNFYTYFTSYNKVRSNLYSAEDKSSTVA  
YRLINENLPKFFDNKAYRTVRNAGVISGDMSIVEQDELFEVDTFNHTLTQYGIDTYNHMIG  
QLNSAINLYNQMHGAGSFKKLPKMKELYKQLLTEREEEFIEEYTDDEVLITSVHNYVSYLI  
DYLNSDKVESFFDTRLKSDGKEVFIKNDVSKTTMSNILFDNWSTIDDLINHEYDSAPENVKK  
TKDDKYFEKRQKDLKKNKSYSLSKIAALCRDTTILEKYIRRLVDDIEKIYTSNNVFSDIVLS  
KHDRSKKLSKNTNAVQAIAKNMLDSIKDFEHDVMLINGSGQEIKNLNVYSEQEALAGILRQV  
DHIYNLTRNYLTKPFSTEKIKLNFNRPTFLDGWDKNKEEANLGILLIKDNRYLGLIMNTSS  
NKA FVNPPKAISNDIYKKVDYKLLPGPNKMLPKVFFATKNIAYYAPSEELLSKYRKGTHKKG  
DSFSIDDCRNLIIDFFKSSINKNTDWSTFGFNFSDTNSYNDISDFYREVEKQGYKLSFTDIDA  
CYIKDLVDNNELYLFQIYNKDFSPYSKGLNLHTLYFKMLFDQRNLDNVVYKLNGEAEVYR  
PASIESDEQIIHKSQONIKKNQKRSNCKKTSTFDYDIVKDRRYCKDKFMLHLPITVNFGTN  
ESGKFNELVNNAIRADKDVNVIGIDRGERNLLYVVVDPCGKIIIEQISLNTIVDKEYDIETD  
YHQLLDEKEGSRDKARKDWNTIENIKELKEGYLSQVVNIIAKLVLYDAIICLEDLNFQFKR  
GRQKVEKQVYQKFEKMLIDKMNYLVLDKSRKQESPOKPGGALNALQLTSAFKSFKELGKQTG  
IIYYVPAYLTSKIDPTTGAFNLFYIKYESVDKARDFFSKFDIIRYNQMDNYFEFGFDYKSFT  
ERASGCKSKWIACTNGERIVKYRNSDKNNSFDDKTVILTDEYRSLFDKYLQNYIDEDDLKDQ  
ILQIDSADFYKNLIKLFQLTLQMRNSSSDGKRDIISPVKNYREEFFCSEFSDDTFPRDADA  
NGAYNIARKGLWVIKQIRETKSGTKINLAMSNSEWLEYAQC�LL

### **Humanized Cas12a coding sequence derived from *Pseudobutyrvibrio ruminis* CF1b (GeneBank ID: NZ\_KE384121.1)**

ATGATCATCGGCCGCGACTTCAACATGTACTACCAGAACCTGACCAAGATGTACCCCATCAG  
CAAGACCCTGCGCAACGAGCTGATCCCCGTGGGCAAGACCCTGGAGAACATCCGCAAGAACG  
GCATCCTGGAGGCCGACATCCAGCGCAAGGCCGACTACGAGCACGTGAAGAAGCTGATGGAC  
AACTACCACAAGCAGCTGATCAACGAGGCCCTGCAGGGCGTGCACCTGAGCGACCTGAGCGA  
CGCCTACGACCTGTACTTCAACCTGAGCAAGGAGAAGAACAGCGTGGACGCCTTACGCAAGT  
GCCAGGACAAGCTGCGCAAGGAGATCGTGAGCCTGCTGAAGAACCACGAGAACTTCCCCAAG  
ATCGGCAACAAGGAGATCATCAAGCTGCTGCAGAGCCTGTACGACAACGACACCGACTACAA  
GGCCCTGGACAGCTTACGCAACTTCTACACCTACTTACGACGCTACAACGAGGTGCGCAAGA  
ACCTGTACAGCGACGAGGAGAAGAGCAGCACCGTGGCCTACCGCCTGATCAACGAGAACCTG  
CCCAAGTTCTTGACAACATCAAGGCCTACGCCATCGCCAAGAAGGCCGCGCTGCGCGCCGA  
GGGCCTGAGCGAGGAGGACCAGGACTGCCTGTTTCATCATCGAGACCTTCGAGCGCACCTGA  
CCCAGGACGGCATCGACAACACTACAACGCCGCCATCGGCAAGCTGAACACCGCCATCAACCTG  
TTCAACCAGCAGAACAAGAAGCAGGAGGGCTTCCGCAAGGTGCCCCAGATGAAGTGCCCTGTA  
CAAGCAGATCCTGAGCGACCGCGAGGAGGCCTTCATCGACGAGTTCAGCGACGACGAGGACC  
TGATACCAACATCGAGAGCTTCGCCGAGAACATGAACGTGTTCTGAACAGCGAGATCATC  
ACCGACTTCAAGATCGCCCTGGTGGAGAGCGACGGCAGCCTGGTGTACATCAAGAACGACGT  
GAGCAAGACCAGCTTACGCAACATCGTGTTCGGCAGCTGGAACGCCATCGACGAGAAGCTGA



GCGACGAGTACGACCTGGCCAACAGCAAGAAGAAGAAGGACGAGAaagtactACGAGAAGCGC  
CAGAAGGAGCTGAAGAAGAACAAGAGCTACGACCTGGAGACCATCATCGGCCTGTTTCGACGA  
CAACAGCGACGTGATCGGCAAGTACATCGAGAAGCTGGAGAGCGACATCACCGCCATCGCCG  
AGGCCAAGAACGACTTCGACGAGATCGTGCTGCGCAAGCACGACAAGAACAAGAGCCTGCGC  
AAGAACACCAACGCCGTGGAGGCCATCAAGAGCTACCTGGACACCGTGAAGGACTTCGAGCG  
CGACATCAAGCTGATCAACGGCAGCGGCCAGGAGGTGGAGAAGAACCTGGTGGTGTACGCCG  
AGCAGGAGAACATCCTGGCCGAGATCAAGAACGTGGACAGCCTGTACAACATGAGCCGCAAC  
TACCTGACCCAGAAGCCCTTCAGCACCGAGAAGTTCAAGCTGAACTTCAACCGCGCCACCCT  
GCTGAACGGCTGGGACAAGAACAAGGAGACCGACAACCTGGGCATCCTGTTTCGAGAAGGACG  
GCATGTACTACCTGGGCATCATGAACACCAAGGCCAACAAAGATCTTCGTGAACATCCCCAAG  
GCCACCAGCAACGACGTGTACCACAAGGTGAACTACAAGCTGCTGCCCGGCCCAACAAGAT  
GCTGCCCAAGGTGTTCTTCGCCAGAGCAACCTGGACTACTACAAGCCCAGCGAGGAGCTGC  
TGGCCAAGTACAAGGCCGGCACCCACAAGAAGGGCGACAACCTTCAGCCTGGAGGACTGCCAC  
GCCCTGATCGACTTCTTCAAGGCCAGCATCGAGAAGCACCCCGACTGGAGCAGCTTCGGCTT  
CGAGTTCAGCGAGACCTGCACCTACGAGGACCTGAGCGGCTTCTACCGCGAGGTGGAGAAGC  
AGGGCTACAAGATCACCTACACCGACGTGGACGCCGACTACATCACCGCCTGGTGGAGCGC  
GACGAGCTGTACCTGTTCCAGATCTACAACAAGGACTTCAGCCCCTACAGCAAGGGCAACCT  
GAACCTGCACACCATCTACCTGCAGATGCTGTTTCGACCAGCGCAACCTGAACAACGTGGTGT  
ACAAGCTGAACGGCGAGGCCGAGGTGTTCTACCGCCCCGCCAGCATCAACGACGAGGAGGTG  
ATCATCCACAAGGCCGGCGAGGAGATCAAGAACAAGAACAGCAAGCGCGCCGTGGACAAGCC  
CACCAGCAAGTTCGGCTACGACATCATCAAGGACCGCCGCTACAGCAAGGACAAGTTCATGC  
TGCACATCCCCGTGACCATGAACTTCGGCGTGGACGAGACCCGCCGCTTCAACGACGTGGTG  
AACGACGCCCTGCGCAACGACGAGAAGGTGCGCGTGATCGGCATCGACCGCGGCGAGCGCAA  
CCTGCTGTACGTGGTGGTGGTGGACACCGACGGCACCATCCTGGAGCAGATCAGCCTGAACA  
GCATCATCAACAACGAGTACAGCATCGAGACCGACTACCACAAGCTGCTGGACGAGAAGGAG  
GGCGACCGCGACCGCGCCCGCAAGAAGTGGACCACCATCGAGAACATCAAGGAGCTGAAGGA  
GGGCTACCTGAGCCAGGTGGTGAACGTGATCGCCAAGCTGGTGTGAAGTACAACGCCATCA  
TCTGCCTGGAGGACCTGAACTTCGGCTTCAAGCgcggcgcCAGAAGGTGGAGAAGCAGGTG  
TACCAGAAGTTCGAGAAGATGCTGATCGACAAGCTGAACTACCTGGTGTGATCGACAAGAGCCG  
CAAGCAGGACAAGCCCGAGGAGTTCGGCGGCGCCCTGAAACGCCCTGCAGCTGACCAGCAAGT  
TCACCAGCTTCAAGGACATGGGCAAGCAGACCGGCATCATCTACTACGTGCCCGCCTACCTG  
ACCAGCAAGATCGACCCACCACCGGCTTCGCCAACCTGTTCTACGTGAAGTACGAGAACGT  
GGAGAAGGCCAAGGAGTTCCTTCAGCCGCTTCGACAGCATCAGCTACAACAACGAGAGCGGCT  
ACTTCGAGTTCGCCTTCGACTACAAGAAGTTCACCGACCGCGCCTGCGGCGCCCGCAGCCAG  
TGGACCGTGTGCACCTACGGCGAGCGCATCATCAAGTTCGCAACACCGAGAAGAACAACAG  
CTTCGACGACAAGACCATCGTGCTGAGCGAGGAGTTCAAGGAGCTGTTTCAGCATCTACGGCA  
TCAGCTACGAGGACGGCGCCGAGCTGAAGAACAAGATCATGAGCGTGGACGAGGCCGACTTC  
TTCCGCAGCCTGACCCGCTGTTCCAGCAGACCATGCAGATGCGCAACAGCAGCAACGACGT  
GACCCGCGACTACATCATCAGCCCCATCATGAACGACCGCGGCGAGTTCCTTCAACAGCGAGG  
CCTGCGACGCCAGCAAGCCCAAGGACGCCGACGCCAACGGCGCCTTCAACATCGCCCCGAAG  
GGCCTGTGGGTGCTGGAGCAGATCCGCAACACCCCCAGCGGCGACAAGCTGAACCTGGCCAT  
GAGCAACGCCGAGTGGCTGGAGTACGCCAGCGCAACCAGATC

**PrCas12a protein sequence**

MIIGRDFNMYYQNLTKMYPISKTLRNELIPVGKTLENIRKNGILEADIQRKADYEHVKKLMD  
NYHKQLINEALQGVHLSDSLSDAYDLYFNLSKEKNSVDAFSKCQDKLRKEIVSLLKNHENFPK  
IGNKEI IKLLQSLYDNDTDYKALDSFSNFYTYFSSYNEVRKNLYSDEEKSSTVAYRLINENL  
PKFLDNIKAYAI AKKAGVRAEGLSEEDQDCLFI IETFERTLTQDGDIDYNAAI GKLNNTAINL  
FNQQNKQEGFRKVPQMKCLYKQILSDREEAFIDEFSDDDELITNIESFAENMNVFLNSEI I  
TDFKIALVESDGS LVYIKNDVSKTSFSNIVFGSWNAID EKLSDEYDLANSKKKKDEKYYEKR  
QKELKKNKSYDLETI IGLFDDNSDVIGKYIEKLESDITAI AEAKNDFDEIVLRKHDKNKS LR  
KNTNAVEAIKSYLDTVKDFERDIKLINGSGQEVEKNLVVYAEQENILAEIKNVDSL NMSRN  
YLTQKPFSTEKFKLNFNRATLLNGWDKNKETDNLGILFEKDGMYL LGIMNTKANKI FVNIPK  
ATSNDVYHKVNYKLLPGPNKMLPKVFFAQSNLDYK PSEELLAKYKAGTHKKGDNFSLEDCH  
ALIDFFKASIEKHPDWSSFGFEFSETCTYEDLSGFYREVEKQGYKIT YTDVDADYITSLVER  
DELYLFQIYNKDFSPYSKGNLNLHTIYLQMLFDQRNLNNVVYKLNGEAEV FYRPASINDEEV  
IIHKAGEEIKNKN SKRAVDKPTSKFGYDI IKDRRYSKDKFMLHI PVTMNFVDETRRFNDVV  
NDALRNDEKVRVIGIDRGERNLLYVVVVDTDGTILEQISLNSI INNEYSIETDYHKLLDEKE  
GDRDRARKNWT TIENIKELKEGYLSQVVNVI AKLVLYKNAI ICLEDLNF GFKRGRQKVEKQV  
YQKFEKMLIDKLNLYVIDKSRKQDKPEEFGGALNALQLTSKFTSFKDMGKQTGI IYYVPAYL  
TSKIDPTTG FANLFYVKYENVEKAKEFFSRFDSI SYNNESGYFEFAFDYK KFTDRACGARSQ  
WTVCTYGERI IKFRNTEKNNSFDDKTIVLSEEFKELFSI YGISYEDGAELKNKIMSVDEADF  
FRSLTRLFQQTMRNSSNDVTRDYI I SPIMNDRGEFFNSEACDASKPKDADANGAFNIARK  
GLWVLEQIRNTPSGDKLNLAMSNAEWLEYAQRNQI

**Humanized Cas12a coding sequence derived from *Proteocatella sphenisci* DSM 23131  
(GeneBank ID: NZ\_KE384028.1)**

GAGAACTTCAAGAACCTGTACCCCATCAACAAGACCCTGCGCTTCGAGCTGCGCCCCCTACGG  
CAAGACCCTGGAGA ACTTCAAGAAGAGCGGCCTGCTGGAGAAGGACGCCTTCAAGGCCAACA  
GCCGCCGAGCATGCAGGCCATCATCGACGAGAAGTTCAAGGAGACCATCGAGGAGCGCCTG  
AAGTACACCGAGTTCAGCGAGTGCACCTGGGCAACATGACCAGCAAGGACAAGAAGATCAC  
CGACAAGGCCGCCACCAACCTGAAGAAGCAGGTGATCCTGAGCTTCGACGACGAGATCTTCA  
ACA ACTACCTGAAGCCC GACAAGAACATCGACGCCCTGTTCAAGAACGACCCCAGCAACCCC  
GTGATCAGCACCTTCAAGGGCTTACCACCTACTTCGTGAACTTCTTCGAGATCCGCAAGCA  
CATCTTCAAGGGCGAGAGCAGCGGCAGCATGGCCTACCGCATCATCGACGAGAACCTGACCA  
CCTACCTGAACAACATCGAGAAGATCAAGAAGCTGCCCGAGGAGCTGAAGAGCCAGCTGGAG  
GGCATCGACCAGATCGACAAGCTGAACA ACTACAACGAGTTCATCACCCAGAGCGGCATCAC  
CCACTACAACGAGATCATCGGCGGCATCAGCAAGAGCGAGAACGTGAAGATCCAGGGCATCA  
ACGAGGGCATCAACCTGTACTGCCAGAAGAACAAGGTGAAGCTGCCCCGCTGACCCCCCTG  
TACAAGATGATCCTGAGCGACCGCGTGAGCAACAGCTTCGTGCTGGACACCATCGAGAACGA  
CACCGAGCTGATCGAGATGATCAGCGACCTGATCAACAAGACCGAGATCAGCCAGGACGTGA  
TCATGAGCGACATCCAGAACATCTTCATCAAGTACAAGCAGCTGGGCAACCTGCCCGGCATC  
AGCTACAGCAGCATCGTGAACGCCATCTGCAGCGACTACGACAACA ACTTCGGCGACGGCAA  
GCGCAAGAAGAGCTACGAGAACGACCGCAAGAAGCACCTGGAGACCAACGTGTACAGCATCA  
ACTACATCAGCGAGCTGCTGACCGACACCGACGTGAGCAGCAACATCAAGATGCGCTACAAG  
GAGCTGGAGCAGAACTACCAGGTGTGCAAGGAGA ACTTCAACGCCACCAACTGGATGAACAT  
CAAGAACATCAAGCAGAGCGAGAAGACCAACCTGATCAAGGACCTGCTGGACATCCTGAAGA  
GCATCCAGCGCTTCTACGACCTGTTTCGACATCGTGGACGAGGACAAGAACCCAGCGCCGAG

TTCTACACCTGGCTGAGCAAGAACGCCGAGAAGCTtGACTTCGAGTTCAACAGCGTGTACAA  
CAAGAGCCGCAACTACCTGACCCGCAAGCAGTACAGCGACAAGAAGATCAAGCTGAACTTCG  
ACAGCCCCACCTGGCCAAGGGCTGGGACGCCAACAAGGAGATCGACAACAGCACCATCATC  
ATGCGCAAGTTCAACAACGACCGCGGCGACTACGACTACTTCCTGGGCATCTGGAACAAGAG  
CACCCCCGCCAACGAGAAGATCATCCCCCTGGAGGACAACGGCCTGTTTCGAGAAGATGCAGT  
ACAAGCTGTACCCCGACCCAGCAAGATGCTGCCAAGCAGTTCCTGAGCAAGATCTGGAAG  
GCCAAGCACCCACCACCCCGAGTTCGACAAGAAGTACAAGGAGGGCCGCCACAAGAAGGG  
CCCCGACTTCGAGAAGGAGTTCCTGCACGAGCTGATCGACTGCTTCAAGCACGGCCTGGTGA  
ACCACGACGAGAAGTACCAGGACGTGTTTCGGCTTCAACCTGCGCAACACCGAGGACTACAAC  
AGCTACACCGAGTTCCTGGAGGACGTGGAGCGCTGCAACTACAACCTGAGCTTCAACAAGAT  
CGCCGACACCAGCAACCTGATCAACGACGGCAAGCTGTACGTGTTCCAGATCTGGAGCAAGG  
ACTTCAGCATCGACAGCAAGGGCACCAAGAACCTGAACACCATCTACTTCGAGAGCCTGTTC  
AGCGAGGAGAACATGATCGAGAAGATGTTCAAGCTGAGCGGCGAGGCCGAGATCTTCTACCG  
CCCCGCCAGCCTGAACTACTGCGAGGACATCATCAAGAAGGGCCACCACCACGCCGAGCTGA  
AGGACAAGTTCGACTACCCCATCATCAAGGACAAGCGCTACAGCCAGGACAAGTTCCTTCTTC  
CACGTGCCCATGGTGATCAACTACAAGAGCGAGAAGCTGAACAGCAAGAGCCTGAACAACCG  
CACCAACGAGAACCTGGGCCAGTTCACCCACATCATCGGCATCGACCGCGGCGAGCGCCACC  
TGATCTACCTGACCGTGGTGGACGTGAGCACCGGCGAGATCGTGGAGCAGAAGCACCTGGAC  
GAGATCATCAACACCGACACCAAGGGCGTGGAGCACAAGACCCACTACCTGAACAAGCTGGA  
GGAGAAGAGCAAGACCCGCGACAACGAGCGCAAGAGCTGGGAGGCCATCGAGACCATCAAGG  
AGCTGAAGGAGGGCTACATCAGCCACGTGATCAACGAGATCCAGAAGCTGCAGGAGAAGTAC  
AACGCCCTGATCGTGATGGAGAACCTGAACTACGGCTTCAAGAACAGCCGCATCAAGGTGGA  
GAAGCAGGTGTACCAGAAGTTCGAGACCGCCCTGATCAAGAAGTTCAACTACATCATCGACA  
AGAAGGACCCCGAGACCTACATCCACGGCTACCAGCTGACCAACCCCATCACCACCCTGGAC  
AAGATCGGCAACCAGAGCGGCATCGTGCTGTACATCCCCGCCTGGAACACCAGCAAGATCGA  
CCCCGTGACCGGCTTCGTGAACCTGCTGTACGCCGACGACCTGAAGTACAAGAACCAGGAGC  
AGGCCAAGAGCTTCATCCAGAAGATCGACAACATCTACTTCGAGAACGGCGAGTTCAGTTC  
GACATCGACTTCAGCAAGTGGAAACAACCGCTACAGCATCAGCAAGACCAAGTGGACCCTGAC  
CAGCTACGGCACCCGCATCCAGACCTTCCGCAACCCCCAGAAGAACAACAAGTGGGACAGCG  
CCGAGTACGACCTGACCGAGGAGTTCAGCTGATCCTGAACATCGACGGCACCCCTGAAGAGC  
CAGGACGTGGAGACCTACAAGAAGTTCATGAGCCTGTTCAAGCTGATGCTGCAGCTGCGCAA  
CAGCGTGACCGGCACCGACATCGACTACATGATCAGCCCCGTGACCGACAAGACCGGCACCC  
ACTTCGACAGCCGCGAGAACATCAAGAACCTGCCCGCCGACGCCGACGCCAACGGCGCCTAC  
AACATCGCCCCGAAGGGCATCATGGCCATCGAGAACATCATGAACGGCATCAGCGACCCCT  
GAAGATCAGCAACGAGGACTACCTGAAGTACATCCAGAACCAGCAGGAG

### **PsCas12a protein sequence**

ENFKNLYPINKTLRFELRPYGKTLLENFKKSGLLEKDAFKANSRRSMQAIIDEKFKETIEERL  
KYTEFSECDLGNMTSKDKKITDKAATNLKKQVILSFDDEIFNNYLKPKDNIDALFKNDPSNP  
VISTFKGFTTYFVNF FEIRKHIFKGESSGSMAYRIIDENLTTYLN NIEKIKKLPEELKSQLE  
GIDQIDKLNNYNEFITQSGITHYNEIIGGISKSENVKIQGINEGINLYCQKNKVKLPRLTPL  
YKMILSDRVSN SFVLDTIENDTELIEMI SDLINKTEISQDVIMSDIQNIFIKYKQLGNLPGI  
SYSSIVNAICSDYDNNFGDGKRKKS YENDRKKHLETNVYSINYISELLTDTDVSSNIK MRYK  
ELEQNYQVCKENFNATNWMNIKNIKQSEKTNLIKDLLDILKSIQRFYDLFDIVDEDKNPSAE

FYTWLSKNAEKLDDEFNSVYNKSRNYLTRKQYSDKKIKLNFDSPTLAKGWDANKEIDNSTII  
MRKFNNDRGDYDYFLGIWNKSTPANEKIIPLEDNGLFEKMQYKLYPDPKMLPKQFLSKIWK  
AKHPTTPEFDKKYKEGRHKKGPDFEKEFLHELIDCFKHGLVNHDEKYQDVFGFNLRNTEDYN  
SYTEFLEDVERCNYNLSFNKIADTSNLIINDGKLYVFQIWSKDFSIDSKGTKNLNTIYFESLF  
SEENMIEKMFKLSGEAEIFYRPASLNYCEDIIKKGHHHAELKDKFDYPIIKDKRYSQDKFFF  
HVPMVINYKSEKLSKSLNRTNENLGQFTHIIGIDRGERHLYLTVVDVSTGEIVEQKHL  
EINTDTKGVEHKTHYLNKLEEKSKTRDNERKSWEAIETIKELKEGYISHVINEIQKLOEKY  
NALIVMENLNYGFKNSRIKVEKQVYQKFETALIKKFNYIIDKKDPETYIHGYQLTNPITTL  
KIGNQSGIVLYIPAWNTSKIDPVTGFVNLLYADDLKYKNQEQAKSFIOKIDNIYFENGEFKF  
DIDFSKWNRYSSISKTKWTLTSYGTRIQTFRNPQKNNKWDSEYDLTEEFKLILNIDGTLKS  
QDVETYKKFMSLFLKMLQLRNSVTGTDIDYMISPVTDKTGTHFDSRENIKNLPADADANGAY  
NIARKGIMAIENIMNGISDPLKISNEDYLKYIQNQOE

**Humanized Cas12a coding sequence derived from *Pseudobutyrvibrio xylanivorans* strain DSM 10317 (GeneBank ID: FMWK0100002.1)**

ATGATCATCGGCCGCGACTTCAACATGTACTACCAGAACCTGACCAAGATGTACCCCATCAG  
CAAGACCCTGCGCAACGAGCTGATCCCCGTGGGCAAGACCCTGGAGAACATCCGCAAGAACG  
GCATCCTGGAGGCCGACATCCAGCGCAAGGCCGACTACGAGCACGTGAAGAAGCTGATGGAC  
AACTACCACAAGCAGCTGATCAACGAGGCCCTGCAGGGCGTGCACCTGAGCGACCTGAGCGA  
CGCCTACGACCTGTACTTCAACCTGAGCAAGGAGAAGAACAGCGTGGACGCCTTCAGCAAGT  
GCCAGGACAAGCTGCGCAAGGAGATCGTGAGCTTCCTGAAGAACCACGAGAACTTCCCCAAG  
ATCGGCAACAAGGAGATCATCAAGCTGATCCAGAGCCTGAACGACAACGACGCCGACAACAA  
CGCCCTGGACAGCTTCAGCAACTTCTACACCTACTTCAGCAGCTACAACGAGGTGCGCAAGA  
ACCTGTACAGCGACGAGGAGAAGAGCAGCACCGTGGCCTACCGCCTGATCAACGAGAACCTG  
CCCAAGAGCCTGGACAACATCAAGGCCTACGCCATCGCCAAGAAGGCCGGCGTGCAGCGCCGA  
GGCCTGAGCGAGGAGGAGCAGGACTGCCTGTTTCATCATCGAGACCTTCGAGCGCACCTGA  
CCCAGGACGGCATCGACAACACTACAACGCCGACATCGGCAAGCTGAACACCGCCATCAACCTG  
TACAACCAGCAGAACAAGAAGCAGGAGGGCTTCCGCAAGGTGCCCCAGATGAAGTGCCTGTA  
CAAGCAGATCCTGAGCGACCGCGAGGAGGCCTTCATCGACGAGTTCAGCGACGACGAGGACC  
TGATACCAACATCGAGAGCTTCGCCGAGAACATGAACGTGTTTCTGAACAGCGAGATCATC  
ACCGACTTCAAGAACGCCCTGGTGGAGAGCGACGGCAGCCTGGTGTACATCAAGAACGACGT  
GAGCAAGACCCTGTTTCAGCAACATCGTGTTCGGCAGCTGGAACGCCATCGACGAGAAGCTGA  
GCGACGAGTACGACCTGGCCAACAGCAAGAAGAAGGACGAGAagtaactACGAGAAGCGC  
CAGAAGGAGCTGAAGAAGAACAAGAGCTACGACCTGGAGACCATCATCGGCCTGTTTCGACGA  
CAGCATCGACGTGATCGGCAAGTACATCGAGAAGCTGGAGAGCGACATCACCGCCATCGCCG  
AGGCCAAGAACGACTTCGACGAGATCGTGCTGCGCAAGCACGACAAGAACAAGAGCCTGCGC  
AAGAACACCAACGCCGTGGAGGCCATCAAGAGCTACCTGGACACCGTGAAGGACTTCGAGCG  
CGACATCAAGCTGATCAACGGCAGCGCCAGGAGGTGGAGAAGAACCCTGGTGGTGTACGCCG  
AGCAGGAGAACATCCTGGCCGAGATCAAGAACGTGGACAGCCTGTACAACATGAGCCGCAAC  
TACCTGACCCAGAAGCCCTTCAGCACCGAGAAGTTCAAGCTGAACTTCGAGAACCCCCACCCT  
GCTGAACGGCTGGGACCGCAACAAGGAGAAGGACTACCTGGGCATCCTGTTTCGAGAAGGAGG  
GCATGTACTACCTGGGCATCATCAACAACAACCACCGCAAGATCTTCGAGAACGAGAAGCTG  
TGCACCGGCAAGGAGAGCTGCTTCAACAAGATCGTGTACAAGCAGATCAGCAACGCCGCCAA  
GTACCTGAGCAGCAAGCAGATCAACCCCCAGAACCCCCCAAGGAGATCGCCGAGATCCTCG

TGAAGCGCAAGGCCGACAGCAGCAGCCTGAGCCGCAAGGAGACCGAGCTGTTTCATCGACTAC  
CTGAAGGACGACTTCCTGGTGAACCTACCCCATGATCATCAACAGCGACGGCGAGAACTTCTT  
CAACTTCCACTTCAAGCAGGCCAAGGACTACGGCAGCCTGCAGGAGTTCTTCAAGGAGGTGG  
AGCACCAGGCCTACAGCCTGAAGACCCGCCCATCGACGACAGCTACATCTACCGCATGATC  
GACGAGGGCAAGCTGTACCTGTTCCAGATCCACAACAAGGACTTCAGCCCCTACAGCAAGGG  
CAACCTGAACCTGCACACCATCTACCTGCAGATGCTGTTTCGACCAGCGCAACCTGAACAACG  
TGGTGTACAAGCTGAACGGCGAGGCCGAGGTGTTCTACCGCCCCGCCAGCATCAACGACGAG  
GAGGTGATCATCCACAAGGCCGGCGAGGAGATCAAGAACAAGAACAGCAAGCGCGCCGTGGA  
CAAGCCCACCAGCAAGTTTCGGCTACGACATCATCAAGGACCGCCGCTACAGCAAGGACAAGT  
TCATGCTGCACATCCCCGTGACCATGAACTTCGGCGTGGACGAGACCCGCCGCTTCAACGAC  
GTGGTGAACGACGCCCTGCGCAACGACGAGAAGGTGCGCGTGATCGGCATCGACCGCGGCCA  
GCGCAACCTGCTGTACGTGGTGGTGGTGGACACCGACGGCACCATCCTGGAGCAGATCAGCC  
TGAACAGCATCATCAACAACGAGTACAGCATCGAGACCGACTACCACAAGCTGCTGGACGAG  
AAGGAGGGCGACCGCGACCGCGCCCGCAAGAACTGGACCACCATCGAGAACATCAAGGAGCT  
GAAGGAGGGCTACCTGAGCCAGGTGGTGAACGTGATCGCCAAGCTGGTGTGAAGTACAACG  
CCATCATCTGCCTGGAGGACCTGAACTTCGGCTTCAAGCGcggcgcgCAGAAGGTGGAGAAG  
CAGGTGTACCAGAAGTTCGAGAAGATGCTGATCGACAAGCTGAACTACCTGGTGTGACAAA  
GAGCCGCAAGCAGGAGAAGCCCGAGGAGTTCGGCGGCGCCCTGAACGCCCTGCAGCTGACCA  
GCAAGTTCACCAGCTTCAAGGACATGGGCAAGCAGACCGGCATCATCTACTACGTGCCCGCC  
TACCTGACCAGCAAGATCGACCCACCACCGGCTTCGCCAACCTGTTCTACGTGAAGTACGA  
GAACGTGGAGAAGGCCAAGGAGTTCTTCAGCCGCTTCGACAGCATCAGCTACAACAACGAGA  
GCGGCTACTTCGAGTTCGCCTTCGACTACAAGAAGTTCACCGACCGCGCCTGCGGGCGCCCGC  
AGCCAGTGGACCGTGTGCACCTACGGCGAGCGCATCATCAAGTACCGCAACGCCGACAAGAA  
CAACAGCTTCGACGACAAGACCATCGTGCTGAGCGAGGAGTTCAGGAGCTGTTTCAGCATCT  
ACGGCATCAGCTACGAGGACGGCGCCGAGCTGAAGAACAAGATCATGAGCGTGGACGAGGCC  
GACTTCTTCCGCTGCCTGACCGGCCTGCTGCAGAAGACCTGCAGATGCGCAACAGCAGCAA  
CGACGGCACCCGCGACTACATCATCAGCCCCATCATGAACGACCGCGGCGAGTTCTTCAACA  
GCGAGGCCTGCGACGCCAGCAAGCCCAAGGACGCCGACGCCAACGGCGCCTTCAACATCGCC  
CGCAAGGGCCTGTGGGTGCTGGAGCAGATCCGCAACACCCCCAGCGGCGACAAGCTGAACCT  
GGCCATGAGCAACGCCGAGTGGCTGGAGTACGCCAGCGCAACCAGATC

### **PxCas12a protein sequence**

MIIGRDFNMYQNLTKMYPISKTLRNELIPVGKTLLENIRKNGILEADIQRKADYEHVKKLMD  
NYHKQLINEALQGVHLSDSLSDAYDLYFNLSKEKNSVDAFSKCQDKLRKEIVSFLKNHENFPK  
IGNKEIIKLIQSLNDNDADNNALDSFSNFYTYFSSYNEVRKNLYSDEEKSSTVAYRLINENL  
PKSLDNIKAYAIKAGVRAEGLSEEEQDCLFI IETFERTLTQDGIDNYNADIGKLNNTAINL  
YNQQNKQEGFRKVPQMKCLYKQILSDREEAFIDEFSDDDLITNIESFAENMNVFLNSEII  
TDFKNALVESDGLVYIKNDVSKTLFSNIVFGSWNAIDKLSDEYDLANSKKKKDEKYYEKR  
QKELKKNKSYDLETIIIGLFDDSIDVIGKYIEKLESDITAI AEAKNDFDEIVLRKHKDNKSLR  
KNTNAVEAIAKSYLDTVKDFERDIKLINGSGQEVEKNLVVYAEQENILAEIKNVDSLYNMSRN  
YLTQKPFSTEKFKLNFENPTLLNGWDRNKEKDYLGI LFEKEGMYLGI INNNHRKIFENEKL  
CTGKESCFNKIVYKQISNAKYLSKQINPQNPPKEIAEILLKRKADSSSLSRKETELFIDY  
LKDDFLVNYPMI INSDGENFFNFHFQAKDYGSLQEFFKEVEHQAYSLKTRPIDDSYIYRMI  
DEGKLYLFQIHKNDFSPYSKGNLNLHTIYLQMLFDQRNLNNVVYKLNGEAEVYRPA SINDE

EVI I HKAGEE I K N K N S K R A V D K P T S K F G Y D I I K D R R Y S K D K F M L H I P V T M N F G V D E T R R F N D  
V V N D A L R N D E K V R V I G I D R G E R N L L Y V V V V D T D G T I L E Q I S L N S I I N N E Y S I E T D Y H K L L D E  
K E G D R D R A R K N W T T I E N I K E L K E G Y L S Q V V N V I A K L V L K Y N A I I C L E D L N F G F K R G R Q K V E K  
Q V Y Q K F E K M L I D K L N Y L V I D K S R K Q E K P E E F G G A L N A L Q L T S K F T S F K D M G K Q T G I I Y Y V P A  
Y L T S K I D P T T G F A N L F Y V K Y E N V E K A K E F F S R F D S I S Y N N E S G Y F E F A F D Y K K F T D R A C G A R  
S Q W T V C T Y G E R I I K Y R N A D K N N S F D D K T I V L S E E F K E L F S I Y G I S Y E D G A E L K N K I M S V D E A  
D F F R C L T G L L Q K T L Q M R N S S N D G T R D Y I I S P I M N D R G E F F N S E A C D A S K P K D A D A N G A F N I A  
R K G L W V L E Q I R N T P S G D K L N L A M S N A E W L E Y A Q R N Q I

**Humanized Cas12a coding sequence derived from *Sneathia amnii* strain SN35  
(GeneBank ID: CP011280.1)**

ATGAATGATATTGAAGGATTTAAAAGAAGAATTCTTAAAAATTAGTTTAGAAAATTTTGAAGG  
TATATATATATCAAACAAGAAATTAACGAGATTAGTAATAGAAAATTTGGGGATTATAATT  
CAATTAATATGATGATTAAACAGTCTATGAATGAAAAAGGTATATTAAGTAAGAAAGAAATT  
AATGAATTAATTCAGATTTAGAAAATATAAACAAACCAAAGTTAAAAGTTTTAATTTAAG  
CTTTATTTTTGAAAATTTAACAAAAGAACATAAAGAACTTATTATAGATTACATAAGAGAAA  
ATATATGTAATGTCATAGAAAATGTAAAAATAACTATAGAAAATATAGAAATATTGATAAT  
AAAATAGAATTTAAAATAATGCAGAAAAAGTTTCTAAAAATAAAGAAAATGTTAGAATCAAT  
AAATGAATTGTGTAACCTTATAAAAGAATTTAATACTGATGAAATTGAAAAAATAATGAAT  
TCTATAATATATTAATAAAAAATTTTTGAAATTTTTGAAAGTTCATATAAAGTTTTAAATAAA  
GTAAGAAATTTTGTACAAAAAAGAAGTTATAGAAAACAAGATGAAATTAATTTTTCTAA  
CTATCAACTTGAAATGGATGGCATAAAAAATAAGAAAAAGATTGTAGTATTATTTTTGTTA  
GAAAGAGAAATAATGAGAGATGGATATATTATTTAGGTATTTTAAAACATGGAACATAAATA  
AAAGAAAATGACTATTTGTCAAGTGTAGATACAGGATTTTATAAAATGGATTATTATGCACA  
AAATTCATTAAGTAAATGATACCTAAATGCAGTATTACCGTAAAAAATGTAAAAAATGCTC  
CAGAAGATGAAAGTGTTATTTTAAATGATAGCAAAAAATCAATGAACCTTTAGAAAATAACA  
CCAGAAATAAGAAAGTTGTATGGAAATAATGAACATATAAAAGGAGATAAGTTTAAAAAAGA  
ATCTTTAGTAAAAATGGATAGATTTTTGTAAAGAATTTTTACTTAAATATAAATCATTTGAGA  
AGGCAAAGAAAGAAATTTTAAAGTTAAAAGAAAGTAATTTGTATGAAAATTTAGAGGAATTT  
TATCTGATGCAGAGGAAAAAGCTTACTTTTTAGAAATTTATAAATATAGATGAAGATAAAAT  
AAAAAACTTGTTAAAGAAAAAATCTATATCTATTCCAAATATATAATAAAGATTTTTCTG  
CGTACAGTACAGGGAATAAAAAATTTACATACTATGTATTTTGAAGAATTATTTACAGATGAA  
AATTTAAAAAACAGTTTTTAAATTAATGGAAATACGGAAGTCTTTTATAGAATAGCTTC  
ATCTAAACCTAAAATAGTTCACAATAAAGGAGAAAAATTAGTAAATAAAACATATTTAGATG  
ATGGCATAATAAAAACTATAACCAGATAGTGTATATGAAGAAATTTCTGAAAAAGTAAAAAAT  
AATGAAGATTATCAAATTACTAGAAGAAAAATAATATAAAAAATCTTGAAATAAAAGTAGC  
TACTCATGAAATAGTAAAGGATAAAAGATATTTTGAAAAATAATTTTTATTTTATCTACCAA  
TAACTTTAAATAAAAAAGTATCAAATAAAAAACTAATAAAAAATATTAATAAAAAATGTTATA  
GATGAAATAAAGGATTGTAATGAATATAATGTGATAGGTATAGATAGGGGTGAAAGAAATTT  
AATAAGTCTTTGTATAATAAATCAAATGGAGAAATTATACTACAAAAAGAAATGAATATTA  
TTCAGTCATCAGATAAATATAATGTTCGATTATAATGAAAAATTAGAAAATAAATCTAAAGAA  
AGAGATAATGCTAAGAAAAATTGGAGTGAAATTGGAAAAATAAAGGATTTGAAATCAGGGTA  
TTTATCAGCAGTAGTTCATGAAATAGTAAAGCTCGCTATTGAGTACAATGCCGTCATAATAT  
TAGAAGATTTAAATAAATGGCTTTAAAATTCAGAAAAAAGTTGATAACAAATATATCAA

AAATTTGAAAGAGCTTTAATTGAAAAATTGCAATTCTTAATATTTAAAAATTATGATAAAAA  
TGAAAAGGGAGGACTTAGAAATGCATTTCAATTAACACCAGAATTGAAAAATATTACTAAAG  
TTGCATCTCAACAAGGTATAATAATTTATACTAATCCAGCATATACTTCTAAAATAGATCCT  
ACTACAGGTTATGCGAATATTATAAAAAAATCAAATAATAACGAAGAATCTATAGTAAAAGC  
TATTGATAAAATATCTTATGATAAAGAAAAAGATATGTTCTATTTTGATATTAATTTATCAA  
ATAGTAGTTTTAATTTGACAGTAAAAAATGTTTTAAAGAAAAGAATGGAGAATATATACTAAT  
GGTGAAGAATAATATATAAAGATAGGAAATATATTACATTAAACATAACTCAAGAAATGAA  
AGATATTTTAAAGTAAATGTGGTATTGATTATTTAAATATTGATAATCTAAAACAAGATATAT  
TAAAAAATAAACTACATAAAAAAGTTTATTATATATTTGAATTAGCAAATAAAATGAGAAAT  
GAAAATAAAGATGTTGATTATATTATATCTCCAGTATTAATAAAGATGGAAAATTCCTTAT  
GACACAAGAAATTAATGAGCTAACTCCGAAAGATGCCGATTTAAATGGTGCATATAATATTG  
CACTAAAAGGTAAATTAATGATTGATAATTTAAACAAAAAAGAAAAATTTGTATTTTTAAGT  
AATGAAGATTGGTTAAACTTTATTCAAGGAAGA

### **SaCas12a protein sequence**

MNDIEGLKEEFLKISLENFEGIYISNKKLNEISNRKFGDYN SINMMIKQSMNEKGILSKKEI  
NELIPDLENINKPKVKSFNLSFIFENLTKEHKELIIDYIRENICNVIENVKITITIEKYRNIDN  
KIEFKNNAEKVSKIKEMLESINELCKLIKEFNTDEIEKNNEFYNILKNFEIFESSYKVLNK  
VRNFVTKKEVIENKMKLNFSNYQLGNGWHKNKEKDCSIIILFRKRNNERWIYYLGILKHGTKI  
KENDYLSSVDTFGYKMDYYAQNSLSKMI PKCSITVKNVKNAPEDESVILNDSKKFNEPLEIT  
PEIRKLYGNEHIKGDKFKKESLVKWIDFCKEFLLKYKSF EKAKKEILKLKESNL YENLEEF  
YSDAEEKAYFLEFINIDEDKIKKLVKEKNLYLFQIYNKDFSAYSTGNKNLHTMYFEELFTDE  
NLKKPVFKLNGNTEVFYRIASSPKIVHNKGEKLVNKTYLDDGI IKTI PDSVYEEISEKVKN  
NEDYSKLL EENNIK NLEIKVATHEIVKDKRYFENKFLFYLPITL NKKVSNKNTNKNINKNVI  
DEIKDCNEYNVIGIDRGERNLISLCIINQNGEIILOKEMNIIQSSDKYNVDYNEKLEIKSKE  
RDNAKKNWSEIGKIKDLKSGYLSAVVHEIVKLAIEYNAVII LEDLNNGFKNSRKKVKDQIYQ  
KFERALIEKLQFLIFKNYDKNEKGGLRNAFQLTPELKNITKVASQQGII IYTNPAYTSKIDP  
TTGYANIIKKSNNNEESIVKAIDKISYDKEKDMFYFDINLSNSSFNLT VKNVLKKEWRIYTN  
GERIIYKDRKYITLNI TQEMKDILSKCGIDYLNIDNLKQDILKNKLHKKVYIIFELANKMRN  
ENKDVYI IISPVLNKDGKFFMTQEINELTPKDADLNGAYNIALKGKLMIDNLNKKEK FVFLS  
NEDWLNFIQGR

### **Humanized Cas12a coding sequence derived from *Acidaminococcus sp.* BV3L6**

**(GeneBank ID: AWUR01000016.1)**

ATGACACAGTTCGAGGGCTTTACCAACCTGTATCAGGTGAGCAAGACACTGCGGTTTTGAGCT  
GATCCCACAGGGCAAGACCCTGAAGCACATCCAGGAGCAGGGCTTCATCGAGGAGGACAAGG  
CCCGCAATGATCACTACAAGGAGCTGAAGCCCATCATCGATCGGATCTACAAGACCTATGCC  
GACCAGTGCCTGCAGCTGGTGCAGCTGGATTGGGAGAACCTGAGCGCCGATCGACTCCTA  
TAGAAAGGAGAAAACCGAGGAGACAAGGAACGCCCTGATCGAGGAGCAGGCCACATATCGCA  
ATGCCATCCACGACTACTTTCATCGGCCGGACAGACAACCTGACCGATGCCATCAATAAGAGA  
CACGCCGAGATCTACAAGGGCCTGTTCAAGGCCGAGCTGTTTAATGGCAAGGTGCTGAAGCA  
GCTGGGCACCGTGACCACAACCGAGCACGAGAACGCCCTGCTGCGGAGCTTCGACAAGTTTA  
CAACCTACTTCTCCGGCTTTTATGAGAACAGGAAGAACGTGTT CAGCGCCGAGGATATCAGC  
ACAGCCATCCCACACCGCATCGTGCAGGACAACCTCCCAAGTTTAAGGAGAATTGTCACAT

CTTCACACGCCTGATCACCGCCGTGCCAGCCTGCGGGAGCACTTTGAGAACGTGAAGAAGG  
CCATCGGCATCTTCGTGAGCACCTCCATCGAGGAGGTGTTTTCCCTTCCCTTTTTATAACCAG  
CTGCTGACACAGACCCAGATCGACCTGTATAACCAGCTGCTGGGAGGAATCTCTCGGGAGGC  
AGGCACCGAGAAGATCAAGGGCCTGAACGAGGTGCTGAATCTGGCCATCCAGAAGAATGATG  
AGACAGCCACATCATCGCCTCCCTGCCACACAGATTTCATCCCCCTGTTTAAGCAGATCCTG  
TCCGATAGGAACACCCTGTCTTTCATCCTGGAGGAGTTTAAGAGCGACGAGGAAGTGATCCA  
GTCCTTCTGCAAGTACAAGACACTGCTGAGAAACGAGAACGTGCTGGAGACAGCCGAGGCC  
TGTTTAACGAGCTGAACAGCATCGACCTGACACACATCTTCATCAGCCACAAGAAGCTGGAG  
ACAATCAGCAGCGCCCTGTGCGACCACTGGGATACTGAGGAATGCCCTGTATGAGCGGAG  
AATCTCCGAGCTGACAGGCAAGATCACCAAGTCTGCCAAGGAGAAGGTGCAGCGCAGCCTGA  
AGCACGAGGATATCAACCTGCAGGAGATCATCTCTGCCGAGGCAAGGAGCTGAGCGAGGCC  
TTCAAGCAGAAAACCAGCGAGATCCTGTCCCACGCACACGCCGCCCTGGATCAGCCACTGCC  
TACAACCCTGAAGAAGCAGGAGGAGAAGGAGATCCTGAAGTCTCAGCTGGACAGCCTGCTGG  
GCCTGTACCACCTGCTGGACTGGTTTTGCCGTGGATGAGTCCAACGAGGTGGACCCCGAGTTC  
TCTGCCCGGCTGACCGGCATCAAGCTGGAGATGGAGCCTTCTCTGAGCTTCTACAACAAGGC  
CAGAAATTATGCCACCAAGAAGCCCTACTCCGTGGAGAAGTTCAAGCTGAACTTTCAGATGC  
CTACACTGGCCTCTGGCTGGGACGTGAATAAGGAGAAGAACAATGGCGCCATCCTGTTTGTG  
AAGAACGGCCTGTACTATCTGGGCATCATGCCAAAGCAGAAGGGCAGGTATAAGGCCCTGAG  
CTTCGAGCCCACAGAGAAAACCAGCGAGGGCTTTGATAAGATGTACTATGACTACTTCCCTG  
ATGCCGCCAAGATGATCCCAAAGTGCAGCACCCAGCTGAAGGCCGTGACAGCCACTTTCAG  
ACCCACACAACCCCATCCTGCTGTCCAACAATTTTCATCGAGCCTCTGGAGATCACAAAGGA  
GATCTACGACCTGAACAATCCTGAGAAGGAGCCAAAGAAGTTTCAGACAGCCTACGCCAAGA  
AAACCGGCGACCAGAAGGGCTACAGAGAGGCCCTGTGCAAGTGGATCGACTTTCACAAGGGAT  
TTTCTGTCCAAGTATACCAAGACAACCTCTATCGATCTGTCTAGCCTGCGGCCATCCTCTCA  
GTATAAGGACCTGGGCGAGTACTATGCCGAGCTGAATCCCCTGCTGTACCACATCAGCTTCC  
AGAGAATCGCCGAGAAGGAGATCATGGATGCCGTGGAGACAGGCAAGCTGTACCTGTTCCAG  
ATCTATAACAAGGACTTTGCCAAGGGCCACCACGGCAAGCCTAATCTGCACACACTGTATTG  
GACCGGCCTGTTTTCTCCAGAGAACCTGGCCAAGACAAGCATCAAGCTGAATGGCCAGGCCG  
AGCTGTTCTACCGCCCTAAGTCCAGGATGAAGAGGATGGCACACCCGGCTGGGAGAGAAGATG  
CTGAACAAGAAGCTGAAGGATCAGAAAACCCCAATCCCCGACACCCTGTACCAGGAGCTGTA  
CGACTATGTGAATCACAGACTGTCCCACGACCTGTCTGATGAGGCCAGGGCCCTGCTGCCCA  
ACGTGATCACCAAGGAGGTGTCTCACGAGATCATCAAGGATAGGCGCTTTACCAGCGACAAG  
TTCTTTTTCCACGTGCCTATCACACTGAACTATCAGGCCGCCAATTCCTCCATCTAAGTTCAA  
CCAGAGGGTGAATGCCTACCTGAAGGAGCACCCCGAGACACCTATCATCGGCATCGATCGGG  
GCGAGAGAAACCTGATCTATATCACAGTGATCGACTCCACCGCAAGATCCTGGAGCAGCGG  
AGCCTGAACACCATCCAGCAGTTTGATTACCAGAAGAAGCTGGACAACAGGGAGAAGGAGAG  
GGTGGCAGCAAGGCAGGCCTGGTCTGTGGTGGGCACAATCAAGGATCTGAAGCAGGGCTATC  
TGAGCCAGGTATCCACGAGATCGTGGACCTGATGATCCACTACCAGGCCGTGGTGGTGCTG  
GAGAACCTGAATTTCCGGCTTTAAGAGCAAGAGGACCGGCATCGCCGAGAAGGCCGTGTACCA  
GCAGTTCGAGAAGATGCTGATCGATAAGCTGAATTCCTGGTGTGCTGAAGGACTATCCAGCAG  
AGAAAGTGGGAGGCGTGCTGAACCCATAACCAGCTGACAGACCAGTTCACCTCCTTTGCCAAG  
ATGGGCACCCAGTCTGGCTTCCCTGTTTTACGTGCCTGCCCCATATACATCTAAGATCGATCC  
CCTGACCGGCTTCGTGGACCCCTTCGTGTGAAAACCATCAAGAATCACGAGAGCCGCAAGC  
ACTTCCCTGGAGGGCTTCGACTTCTGCACTACGACGTGAAAACCGGCGACTTTCATCCTGCAC



TTTAAGATGAACAGAAATCTGTCCTTCCAGAGGGGCTGCCCGGCTTTATGCCTGCATGGGA  
TATCGTGTTTCGAGAAGAACGAGACACAGTTTGACGCCAAGGGCACCCCTTTCATCGCCGGCA  
AGAGAATCGTGCCAGTGATCGAGAATCACAGATTCACCGGCAGATACCGGGACCTGTATCCT  
GCCAACGAGCTGATCGCCCTGCTGGAGGAGAAGGGCATCGTGTTTCAGGGATGGCTCCAACAT  
CCTGCCAAAGCTGCTGGAGAATGACGATTCTCACGCCATCGACACCATGGTGGCCCTGATCC  
GCAGCGTGCTGCAGATGCGGAATCCAATGCCGCCACAGGCGAGGACTATATCAACAGCCCC  
GTGCGCGATCTGAATGGCGTGTGCTTCGACTCCCGGTTTTCAGAACCAGAGTGGCCCATGGA  
CGCCGATGCCAATGGCGCCTACCACATCGCCCTGAAGGGCCAGCTGCTGCTGAATCACCTGA  
AGGAGAGCAAGGATCTGAAGCTGCAGAACGGCATCTCCAATCAGGACTGGCTGGCCTACATC  
CAGGAGCTGCGCAAC

### **AsCas12a protein sequence**

MTQFEGFTNLYQVSKTLRFELIPQGKTLKHIQEQQFIEEDKARNNDHYKELKPIIDRIYKTYA  
DQCLQLVQLDWNLSAAIDSYRKEKTEETRNLALIEEQATYRNAIHDFYGRDNLTDANKR  
HAEIYKGLFKAELFNGKVLKQLGTVTTEHENALLRSFDKFTTYFSGFYENRKNVFSAE DIS  
TAIPHRIVQDNFPKFKENCHIFTRLITAVPSLREHFENVKKAIGIFVSTSIIEVFSFPFYNQ  
LLTQTQIDLYNQLLGGISREAGTEKIKGLNEVLNLAIQKNDETAHI IASLPHRFIPLFKQIL  
SDRNTLSFILEEFKSDEEVIQSFCKYKTLRLNENVLETAELFNELNSIDLTHIFISHKLE  
TISSALCDHWDTLRNALYERRISELTGKITKSAKEKVQVRSKLEDINLQEIISAAGKELSEA  
FKQKTSEILSHAHAALDQPLPTTLKKQEEKEILKSQDLSLLGLYHLLDWFVAVDESNEVDPEF  
SARLTGIKLEMEPSLSFYNKARNYATKKPYSVEKFKLNFQMPTLASGWDVNKEKNNGAILFV  
KNGLYYLGIMPQKQGRYKALSFEPTSEKTSSEGFDMYYDYFPDAAKMI PKCSTQLKAVTAHFQ  
THTTPILLSNNFIEPLEITKEIYDLNNPEKEPKKFQAYAKKTGDQKGYREALCKWIDFTRD  
FLSKYTKTTSIDLSSLRPSQYKDLGEYYAELNPLLYHISFQRIAEKEIMDAVETGKLYLFQ  
IYNKDFAKGHHGKPNLHTLYWTGLFSPENLAKTSIKLNGQAEFYRPKSRMKRMAHRLGKEM  
LNKKLKDQKTPIDTLYQELYDYVNHRLSHDLSDEARALLPNVITKEVSHEIIKDRRFTSDK  
FFFHVPITLNYQAANSPSKFNQRVNAYLKEHPETPIIGIDRGERNLIYITVIDSTGKILEQR  
SLNTIQQFDYQKKLDNREKERVAARQAWSVVGTIKDLKQGYLSQVIHEIVDLMIHYQAVVVL  
ENLNFGFKSKRTGIAEKAVYQQFEKMLIDKLNCLVLKDYPAEKVGGVLPYQLTDQFTSFAK  
MGTQSGFLFYVPAPYTSKIDPLTGFDVDFVWKTIKNHESRKHFLGDFDLHYDVKTGDFILH  
FKMNRNLSFQRGLPGFMPAWDIVFEKNETQFQDAKGTFFIAGKRIVPVIENHRFTGRYRDLYP  
ANELIALLEEKGIVFRDGSNILPKLLENDDSHAIDTMVALIRSVLQMRNSNAATGEDYINSP  
VRDLNGVCFDSRFQNPWPMDADANGAYHIALKGQLLLNHLKESKDLKLQNGISNQDWLAYI  
QELRN

### **pCAG-2AeGFP backbone partial sequence**

(CAG-NLS-*XmaI*-*NheI*-NLS-3xHA-T2A-eGFP-SV40)

gacattgattattgactagttattaatagtaatacaattacgggggtcattagttcatagccca  
tatatggaggttccGCGTTACATAACTTACGGTAAATGGCCCGCCTGGCTGACCGCCCAACGA  
CCCCCGCCATTGACGTCAATAATGACGTATGTTCCCATAGTAACGCCAATAGGGACTTTCC  
ATTGACGTCAATGGGTGGACTATTTACGGTAAACTGCCCACTTGGCAGTACATCAAGTGTAT  
CATATGCCAAGTACGCCCCCTATTGACGTCAATGACGGTAAATGGCCCGCCTGGCATTATGC  
CCAGTACATGACCTTATGGGACTTTCTACTTGGCAGTACATCTACGTATTAGTCATCGCTA  
TTACCATGGGTGAGGTGAGCCCCACGTTCTGCTTCACTCTCCCCATCTCCCCCCCCCTCCCC

ACCCCAATTTTGTATTTATTTATTTTTTAATTATTTTGTGCAGCGATGGGGGCGGGGGGG  
GGGGGCGCGGCCAGGCGGGGCGGGGCGGGGCGAGGGGCGGGGCGGGGCGAGGCGGAGAGG  
TGCGGCGGCAGCCAATCAGAGCGGCGCGCTCCGAAAGTTTCCTTTTATGGCGAGGCGGCGGC  
GGCGGCGGCCCTATAAAAAGCGAAGCGCGCGGGGCGGGAGTCGCTGCGTTGCCTTCGCC  
CGTGCCCCGCTCCGCGCCGCTCGCGCCCGCCCGCCCGGCTCTGACTGACCGGTTACTCCC  
ACAGGTGAGCGGGCGGGACGGCCCTTCTCCTCCGGGCTGTAATTAGCGCTTGGTTTAAATGAC  
GGCTCGTTTCTTTTCTGTGGCTGCGTGAAAGCCTTAAAGGGCTCCGGGAGGGCCCTTTGTGC  
GGGGGGAGCGGCTCGGGGGGTGCGTGCGTGTGTGTGTGCGTGGGGAGCGCCGCTGCGGCC  
CGCGCTGCCCGGCGGCTGTGAGCGCTGCGGGCGCGGCGGGGCTTTGTGCGCTCCGCGTGT  
GCGCGAGGGGAGCGCGGCCGGGGGCGGTGCCCGCGGTTGCGGGGGGGCTGCGAGGGGAACAA  
AGGCTGCGTGCGGGGTGTGTGCGTGGGGGGTGTGAGCAGGGGGTGTGGGCGCGGCGGTGCGGC  
TGTAACCCCCCTGCACCCCCCTCCCCGAGTTGCTGAGCACGGCCCGCTTCGGGTGCGGG  
GCTCCGTACGGGGCGTGGCGCGGGGCTCGCCGTGCCGGGCGGGGGGTGGCGGCAGGTGGGGG  
TGCCGGGCGGGGCGGGGCCGCTCGGGCCGGGGAGGGCTCGGGGAGGGGCGCGGCGGCCCC  
CGGAGCGCCGGCGGCTGTGAGGCGCGGCGAGCCCGAGCCATTGCCTTTTATGGTAATCGTG  
CGAGAGGGCGCAGGGACTTCCTTTGTCCCAAATCTGTGCGGAGCCGAAATCTGGGAGGCGCC  
GCCGACCCCCCTTAGCGGGCGCGGGGCGAAGCGGTGCGGCGCCGGCAGGAAGGAAATGGGC  
GGGAGGGCCTTCGTGCGTGC CGCGCCGCGCTCCCTTCTCCATCTCCAGCCTCGGGGCTG  
TCCGCAGGGGGACGGCTGCCTTCGGGGGGGACGGGGCAGGGCGGGGTTCGGCTTCTGGCGTG  
TGACCGGCGGCTCTAGcGCCTCTGCTAACCATGTTTCATGCCTTCTTCTTTTCTTACAGctc  
ctgggcaacgtgctggttattgtgctgtctcatcattttggcaaaGCTAGTGAATTCTAATA  
CGACTACTATAGGCCGCCACCATGCCCAAGAAGAAGAGGAAGGTTcccgggctagcCCAA  
AGAAGAAGAGGAAAGTCTctagaTACCCTTATGATGTTCCAGATTATGCCGGATACCCATAC  
GATGTCCCTGACTATGCAGGCTCCTACCCTTATGACGTCCAGACTACGCCggatccAGGTC  
CGGCGGCGGAGAGGGGAGAGGAAGTCTTCTAACATGCGGTGACGTGGAGGAGAATCCCGGCC  
CAATGGTGAGCAAGGGCGAGGAGCTGTTACCGGGGTGGTGCCCATCTGGTTCGAGCTGGAC  
GGCGACGTAAACGGCCACAAGTTCAGCGTGTCCGGCGAGGGCGAGGGCGATGCCACCTACGG  
CAAGCTGACCCTGAAGTTCATCTGCACCACCGCAAGCTGCCCGTGCCCTGGCCCACCTCG  
TGACCACCCTGACCTACGGCGTGCAGTGCTTCAGCCGCTACCCCGACCACATGAAGCAGCAC  
GACTTCTTCAAGTCCGCCATGCCCGAAGGCTACGTCCAGGAGCGCACCATCTTCTTCAAGGA  
CGACGGCAACTACAAGACCCGCGCCGAGGTGAAGTTCGAGGGCGACACCCTGGTGAACCGCA  
TCGAGCTGAAGGGCATCGACTTCAAGGAGGACGGCAACATCCTGGGGCACAAGCTGGAGTAC  
AACTACAACAGCCACAACGTCTATATCATGGCCGACAAGCAGAAGAACGGCATCAAGGTGAA  
CTTCAAGATCCGCCACAACATCGAGGACGGCAGCGTGCAGCTCGCCGACCACTACCAGCAGA  
ACACCCCATCGGCGACGGCCCCGTGCTGCTGCCCCGACAACCACTACCTGAGCACCCAGTCC  
GCCCTGAGCAAAGACCCCAACGAGAAGCGGATCACATGGTCTGCTGGAGTTCGTGACCGC  
CGCCGGGATCACTCTCGGCATGGACGAGCTGTACAAGtaactgcagcgcgggatctcatgc  
tgagattcttcgccaccccaacttgtttattgcagcttataatggttacaaataaagcaat  
agcatcacaattttcacaataaagcatttttttactgcattctagttgtggtttgtccaa  
actcatcaatgtatctta

**BPK2104-ccdB backbone partial sequence**  
(*lacI*-T7-*lacO*-NLS-*XmaI*-*SpeI*-His<sub>10</sub>-terminator)

TCACTGCCCGCTTCCAGTCGGGAAACCTGTCGTGCCAGCTGCATTAATGAATCGGCCAACG  
CGCGGGGAGAGGCGGTTTGCATATTGGGCGCCAGGGTGGTTTTTCTTTTACCAGTGAGACG  
GGCAACAGCTGATTGCCCTTACCAGCCTGGCCCTGAGAGAGTTGCAGCAAGCGGTCCACGCT  
GGTTTGCCCCAGCAGGCGAAAAATCCTGTTTGTGGTGGTTAACGGCGGGATATAACATGAGC  
TGTCTTCGGTATCGTCGTATCCCCTACCGAGATGTCCGCACCAACGCGCAGCCCGGACTCG  
GTAATGGCGCGCATTGCGCCCAGCGCCATCTGATCGTTGGCAACCAGCATCGCAGTGGGAAC  
GATGCCCTCATTGAGCATTTCATGGTTTGTGAAAACCGGACATGGCACTCCAGTGCCTT  
CCCGTTCCGCTATCGGCTGAATTTGATTGCGAGTGAGATATTTATGCCAGCCAGCCAGACGC  
AGACGCGCCGAGACAGAACTTAATGGGCCCGCTAACAGCGCGATTTGCTGGTGACCCAATGC  
GACCAGATGCTCCACGCCAGTCGCGTACCGTCTTCATGGGAGAAAATAACTGTTGATGG  
GTGTCTGGTCAGAGACATCAAGAAATAACGCCGGAACATTAGTGCAGGCAGCTTCCACAGCA  
ATGGCATCCTGGTCATCCAGCGGATAGTTAATGATCAGCCACTGACGCGTTGCGCGAGAAG  
ATTGTGCACCGCCGCTTTACAGGCTTCGACGCGCTTCGTTCTACCATCGACACCACCACGC  
TGGCACCCAGTTGATCGGCGGAGATTTAATCGCCGCGACAATTTGCGACGGCGCGTGCAGG  
GCCAGACTGGAGGTGGCAACGCCAATCAGCAACGACTGTTTGCCCGCCAGTTGTTGTGCCAC  
GCGGTTGGGAATGTAATTCAGCTCCGCCATCGCCGCTTCCACTTTTTCCCGCGTTTTTCGCAG  
AAACGTGGCTGGCCTGGTTACCACGCGGGAAACGGTCTGATAAGAGACACCGGCATACTCT  
GCGACATCGTATAACGTTACTGGTTTTACATTCACCACCCTGAATTGACTCTCTTCCGGGCG  
CTATCATGCCATACCGCGAAAGTTTTGCGCCATTCGATGGTGTCCGGGATCTCGACGCTCT  
CCCTTATGCGACTCCTGCATTAGGAAATTAATACGACTCACTATAAGGGGAATTTGTGAGCGGA  
TAAACAATTCCTGTAGAAATAATTTGTTAACTTTAATAAGGAGATATCATATGCCCAAG  
AAGAAGAGGAAGGTTccccgggctagtcATCACCATCACCCATCATCACCATCACTAGGC  
GGCCGCATAATGCTTAAGTCGAACAGAAAGTAATCGTATTGTACACGGCCGCATAATCGAAA  
TTAATacgactcactataggGAATTCGGTACctgagaataa~~ctagcaTAACCCCTTGGGGCC~~  
TCTAAACGGGTCTTGAGGGGTTTTTTGCTGAAACCTCAGGCATTT

**pUC19-U6-crRNA1 backbone partial sequence**

(U6-tRNA-crRNA1-BasI-BasI-tRNA-terminator)

TGTA AACGACG GCCAGTGAATTCGAGGGCCTATTTCCCATGATTCCTTCATATTTGCATAT  
ACGATACAAGGCTGTTAGAGAGATAAATTGGAATTAATTTGACTGTAAACACAAAGATATTAG  
TACAAAATACGTGACGTAGAAAGTAATAATTTCTTGGGTAGTTTGCAGTTTTAAAATTATGT  
TTTAAAATGGACTATCATATGCTTACCGTAACTTGAAAGTATTTGATTTCTTGGCTTTATA  
TATCTTGTGGAAAGGACGAAACACCGGAACAAAGCACCAGTGGTCTAGTGGTGGAAATAGTAC  
CCTGCCACGGTACAGACCCGGGTTTCGATTCCCGGCTGGTGCATTTCTACTATTGTAGATAG  
AGACCGAGAGAGGGTCTCAAACAAGCACCAGTGGTCTAGTGGTGGAAATAGTACCCTGCCAC  
GGTACAGACCCGGGTTTCGATTCCCGGCTGGTGCANNNNNNNNNNNNNNNNNNNNNNNNNNN  
NNNNNNNNNNNNNNNNNNNNNNNNNNNNNNNNNNNNNNNNNNNNNNNNNNNNNNNNNNNN  
AAGCTTGCGCT  
AATCATGGTCATAGCTGTTTCCTG

**pUC19-U6-crRNA2 backbone partial sequence**

(U6-tRNA-crRNA2-BasI-BasI-tRNA-terminator)

TGTA AACGACG GCCAGTGAATTCGAGGGCCTATTTCCCATGATTCCTTCATATTTGCATAT  
ACGATACAAGGCTGTTAGAGAGATAAATTGGAATTAATTTGACTGTAAACACAAAGATATTAG  
TACAAAATACGTGACGTAGAAAGTAATAATTTCTTGGGTAGTTTGCAGTTTTAAAATTATGT
